# Supplementary material for: Synthesis of 8-hydroxy-2-iminochromene derivatives as selective and potent inhibitors of human carbonyl reductase 1
Source: Royal Society of Chemistry journal article supplement (doi:10.1039/c5ob00847f), 2015-01-01
Supplement: c5ob00847f1.pdf [file c5ob00847f1.pdf]

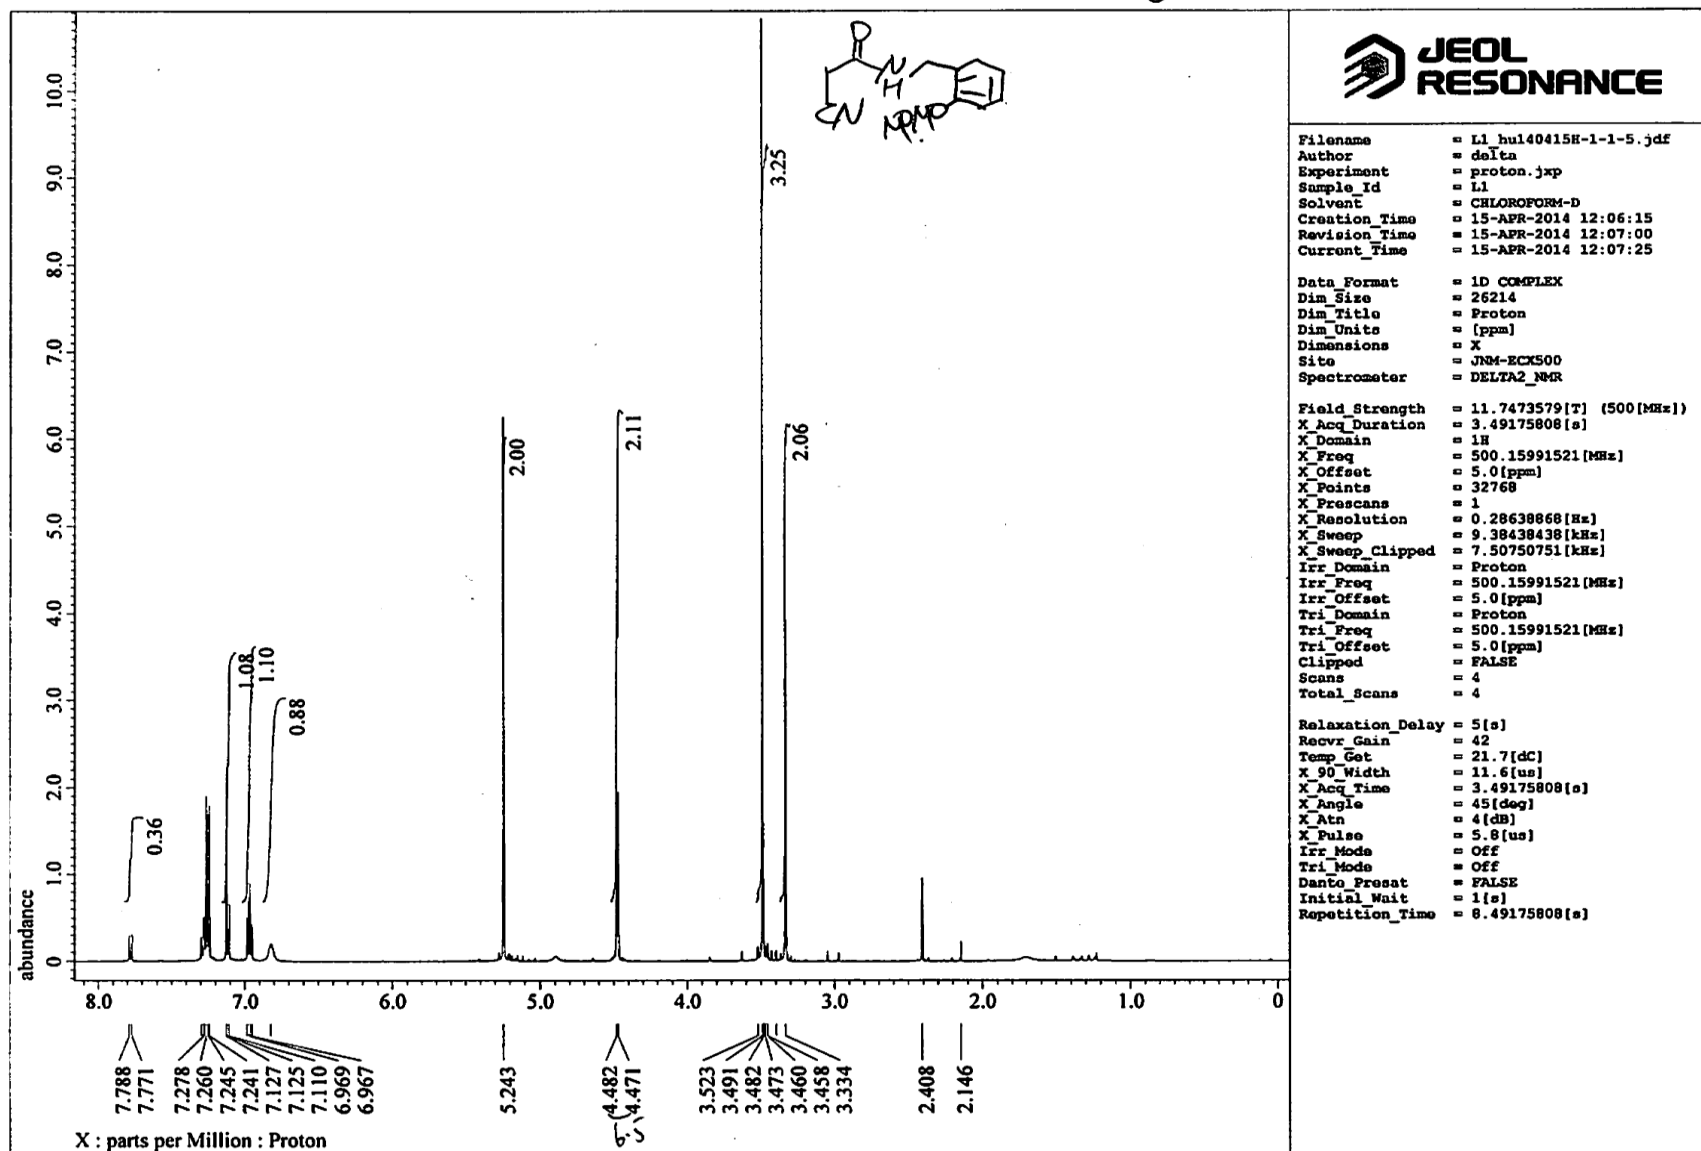

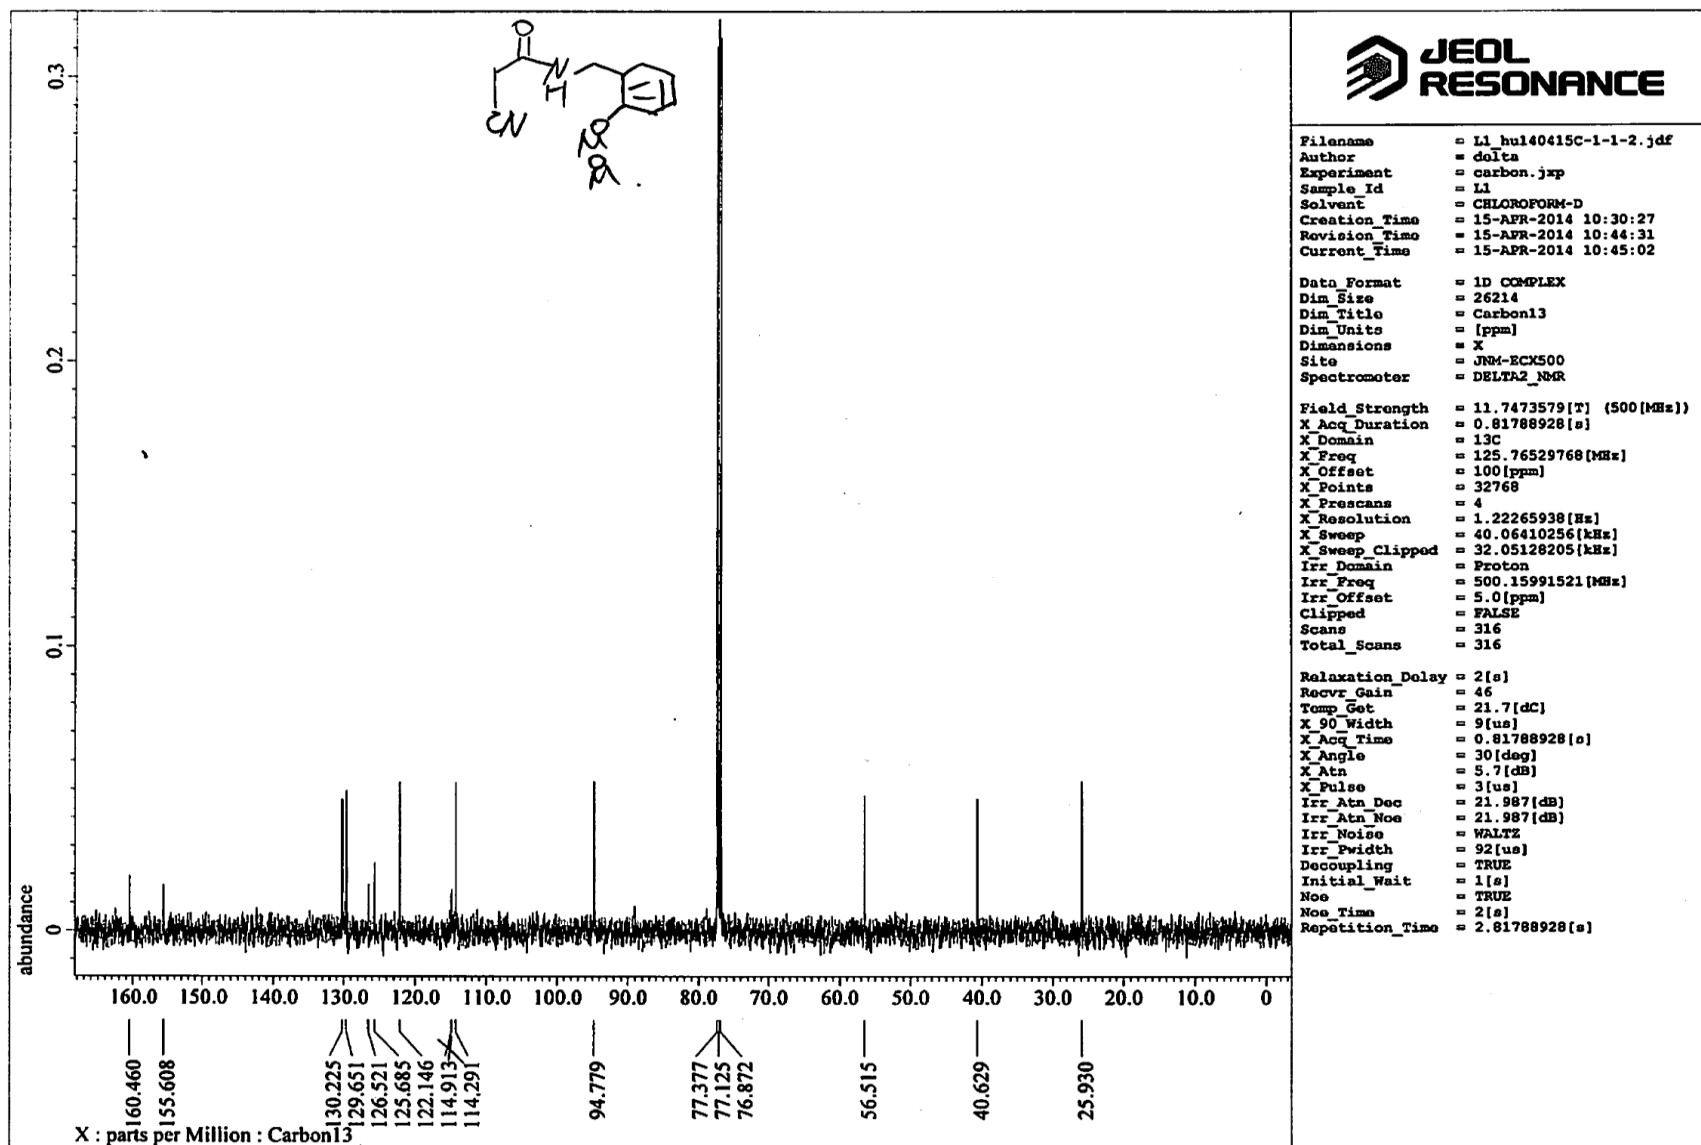

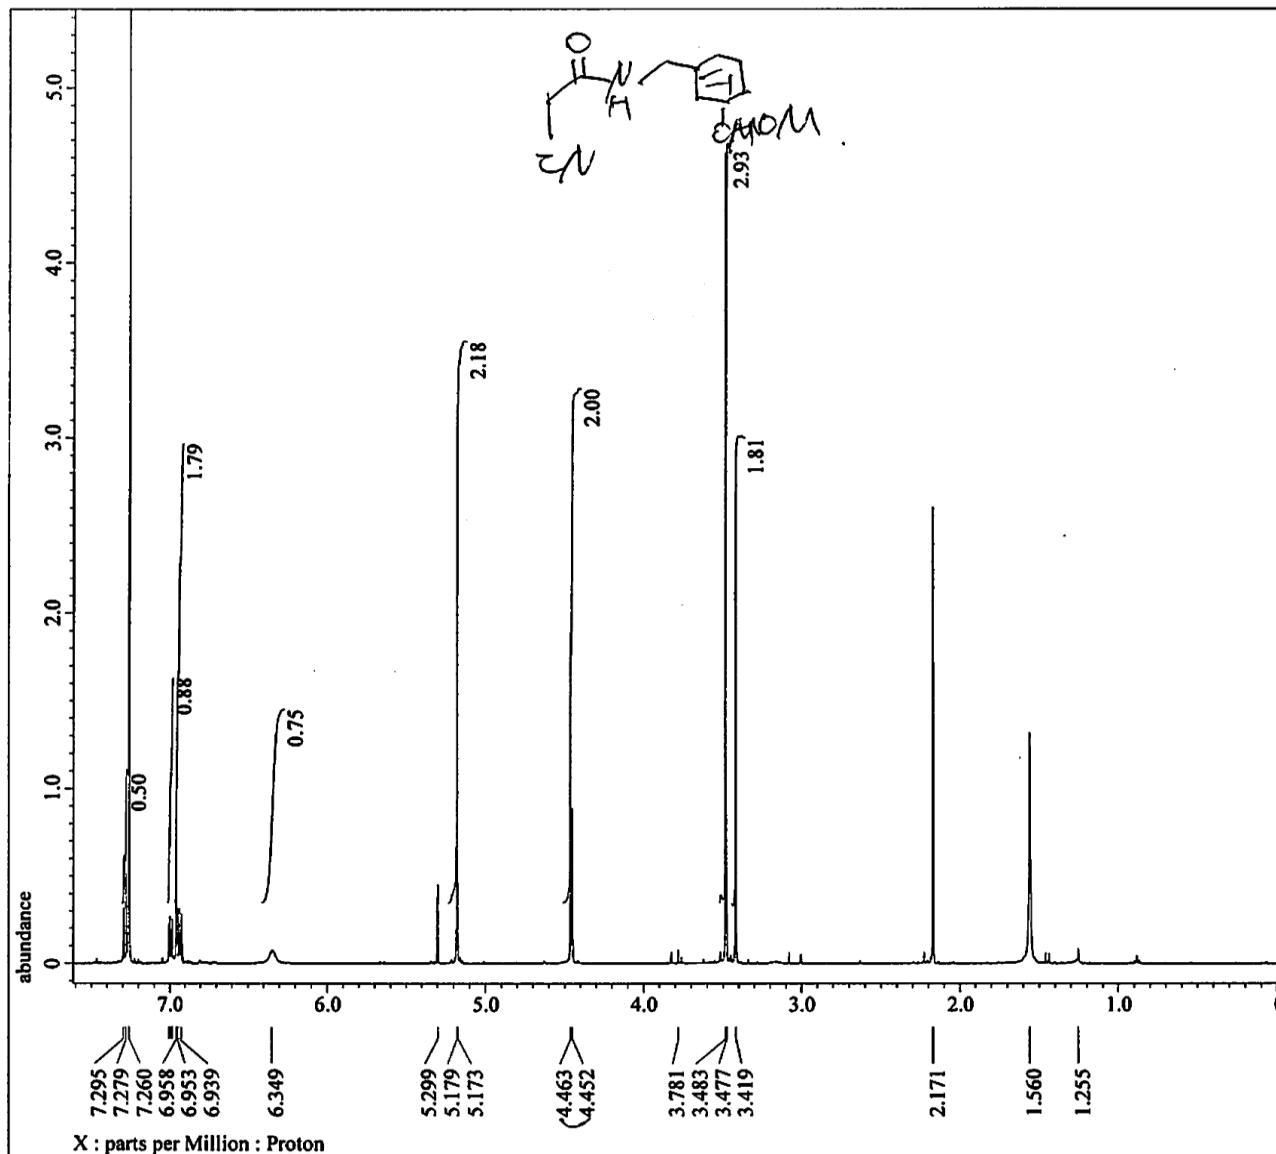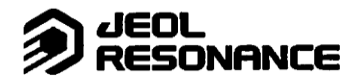

Filename = L1\_hu140117H-1-1-5.jdf  
 Author = delta  
 Experiment = proton.jpg  
 Sample Id = L1  
 Solvent = CHLOROFORM-D  
 Creation Time = 17-JAN-2014 14:26:33  
 Revision Time = 17-JAN-2014 14:28:55  
 Current Time = 17-JAN-2014 14:29:18

Data Format = 1D COMPLEX  
 Dim Size = 26214  
 Dim Title = Proton  
 Dim Units = [ppm]  
 Dimensions = X  
 Site = JNM-ECS500  
 Spectrometer = DELTA2\_NMR

Field Strength = 11.7473579[T] (500[MHz])  
 X Acq Duration = 3.49175808[s]  
 X Domain = 1H  
 X Freq = 500.15991521[MHz]  
 X Offset = 5.0[ppm]  
 X Points = 32768  
 X Prescans = 1  
 X Resolution = 0.28638868[Hz]  
 X Sweep = 9.38438438[kHz]  
 X Sweep\_Clippped = 7.50750751[kHz]  
 Irr Domain = Proton  
 Irr Freq = 500.15991521[MHz]  
 Irr Offset = 5.0[ppm]  
 Tri Domain = Proton  
 Tri Freq = 500.15991521[MHz]  
 Tri Offset = 5.0[ppm]  
 Clipped = FALSE  
 Scans = 8  
 Total Scans = 8

Relaxation\_Delay = 5[s]  
 Recvr Gain = 54  
 Temp Get = 22.3[degC]  
 X 90\_Width = 11.6[us]  
 X Acq Time = 3.49175808[s]  
 X Angle = 45[deg]  
 X Atn = 4[dB]  
 X Pulse = 5.8[us]  
 Irr Mode = Off  
 Tri Mode = Off  
 Datto Presat = FALSE  
 Initial Wait = 1[s]  
 Repetition Time = 6.49175808[s]

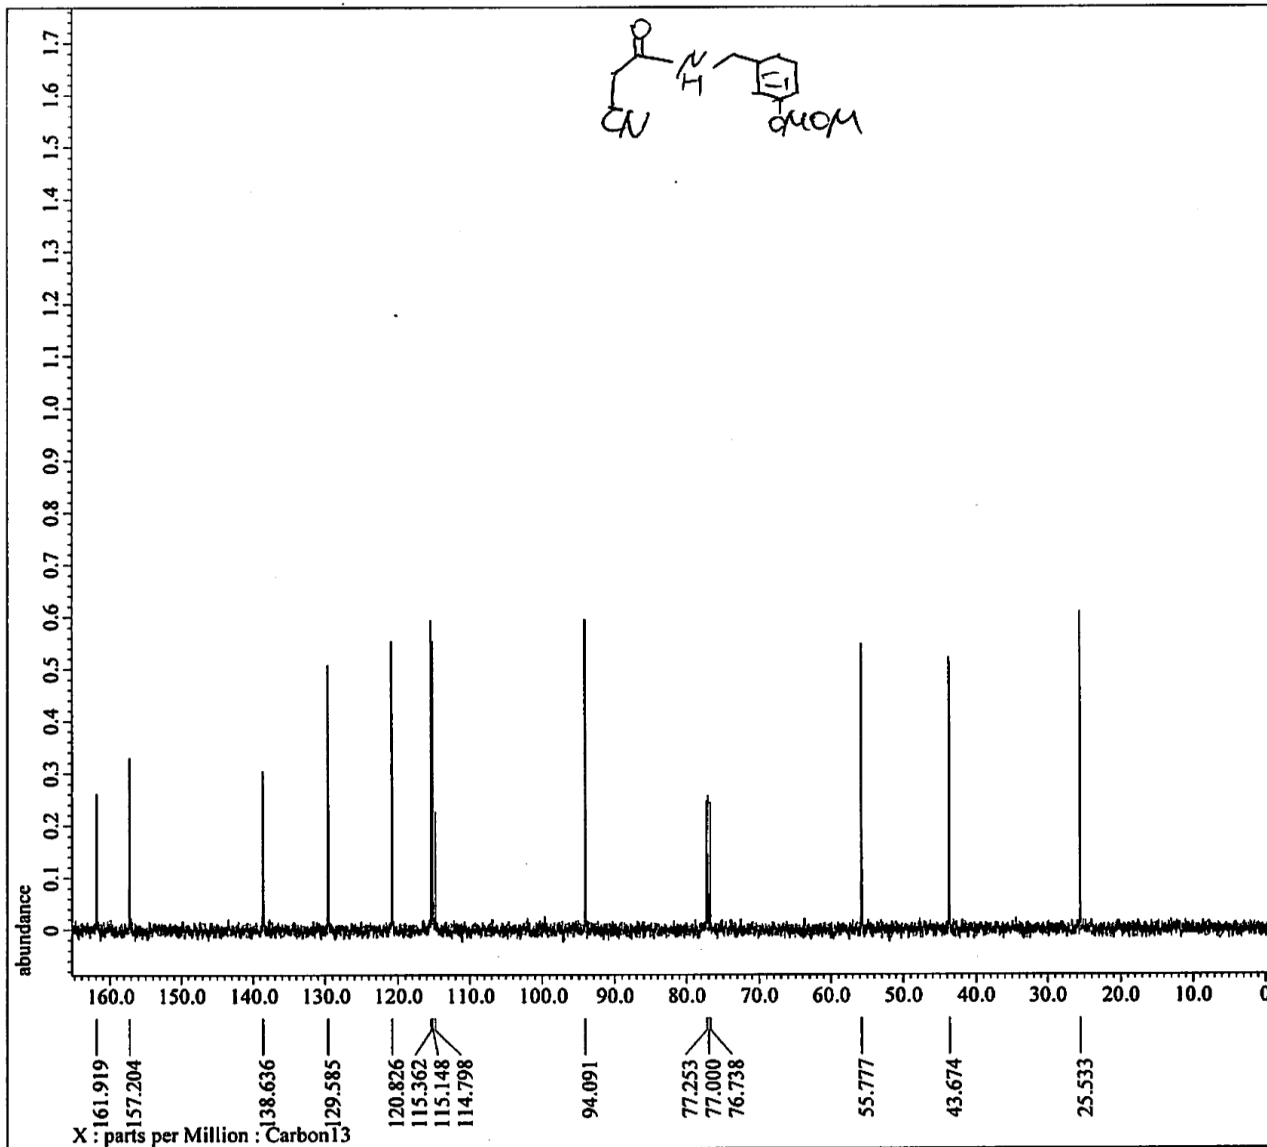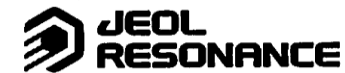

Filename = L1\_hul40120H-1-1-3.jdf  
 Author = delta  
 Experiment = carbon.jsp  
 Sample\_Id = L1  
 Solvent = CHLOROFORM-D  
 Creation Time = 20-JAN-2014 09:48:37  
 Revision Time = 20-JAN-2014 09:50:24  
 Current Time = 20-JAN-2014 09:50:33  
 Comment = p.67-Fr.5  
 Data Format = 1D COMPLEX  
 Dim Size = 26214  
 Dim Title = Carbon13  
 Dim Units = [ppm]  
 Dimensions = X  
 Site = JNM-ECK500  
 Spectrometer = DELTA2 NMR  
 Field Strength = 11.7473579[T] (500[MHz])  
 X\_Acq\_Duration = 0.81788928[s]  
 X\_Domain = 13C  
 X\_Freq = 125.76529768[MHz]  
 X\_Offset = 100[ppm]  
 X\_Points = 32768  
 X\_Prescans = 4  
 X\_Resolution = 1.22265938[Hz]  
 X\_Sweep = 40.06410256[kHz]  
 X\_Sweep\_Clipped = 32.05128205[kHz]  
 Irr\_Domain = Proton  
 Irr\_Freq = 500.15991521[MHz]  
 Irr\_Offset = 5.0[ppm]  
 Clipped = FALSE  
 Scans = 41  
 Total\_Scans = 41  
 Relaxation\_Delay = 1[s]  
 Recvr\_Gain = 46  
 Temp\_Got = 21.3[deg]  
 X\_90\_Width = 9[us]  
 X\_Acq\_Time = 0.81788928[s]  
 X\_Angle = 30[deg]  
 X\_Atn = 5.7[dB]  
 X\_Pulse = 3[us]  
 Irr\_Atn\_Dec = 21.987[dB]  
 Irr\_Atn\_Noe = 21.987[dB]  
 Irr\_Noise = WALTZ  
 Irr\_Pwidth = 92[us]  
 Decoupling = TRUE  
 Initial\_Wait = 1[s]  
 Noe = TRUE  
 Noe\_Time = 1[s]  
 Repetition\_Time = 1.81788928[s]



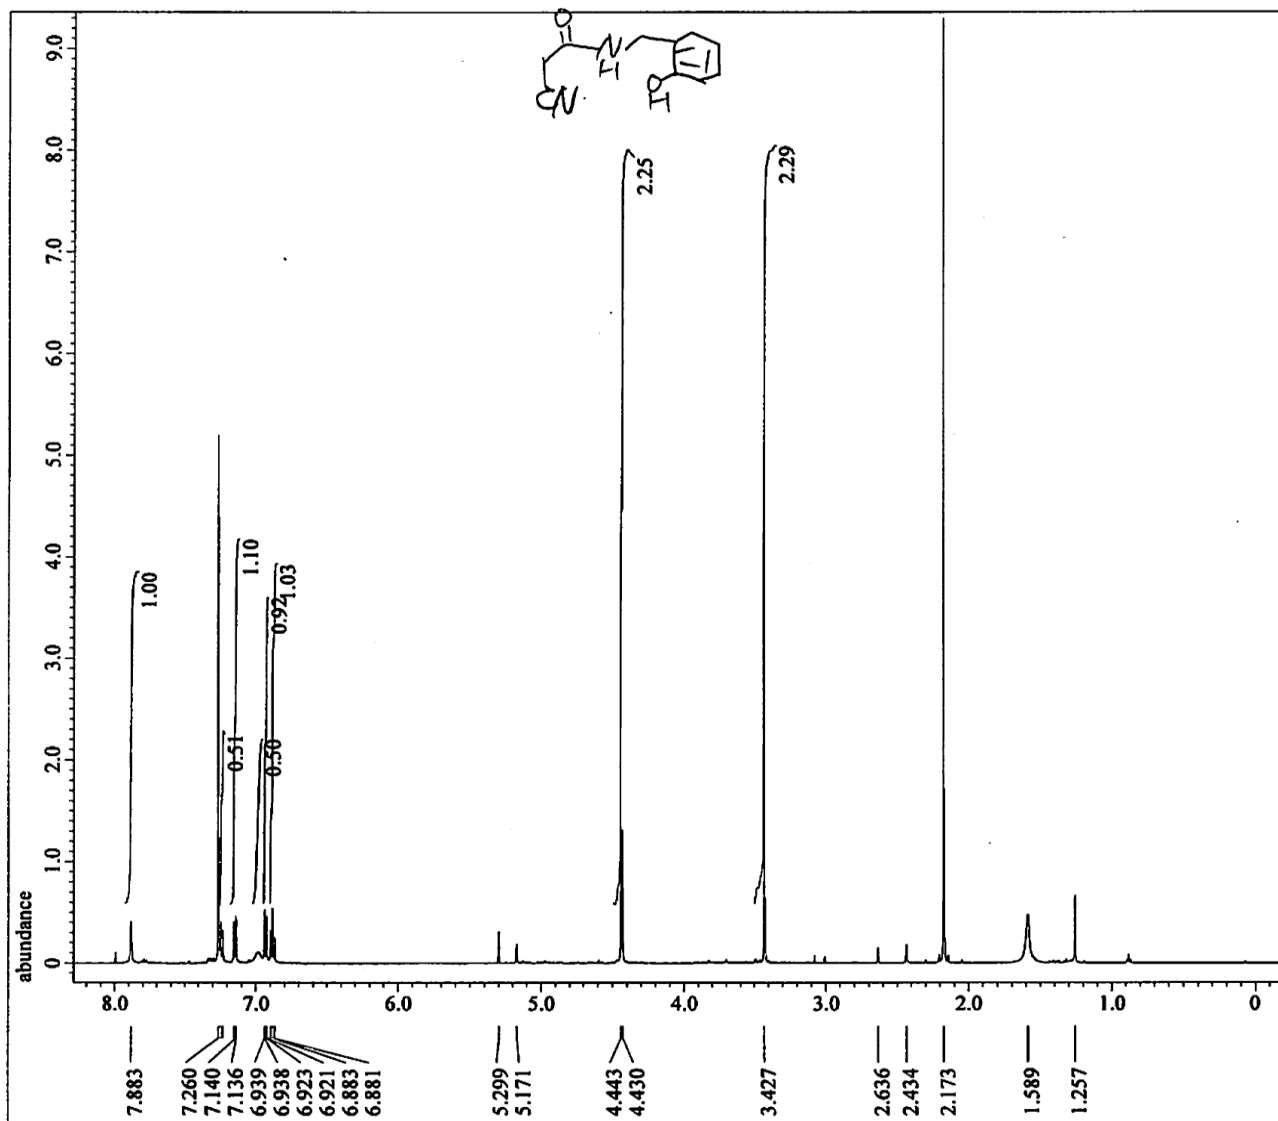

X : parts per Million : Proton

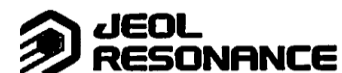

Filename = LI\_hul40228H-1-1-7.jdf  
 Author = delta  
 Experiment = proton.jpg  
 Sample Id = LI  
 Solvent = CHLOROFORM-D  
 Creation Time = 28-FEB-2014 11:08:40  
 Revision Time = 28-FEB-2014 11:11:13  
 Current Time = 28-FEB-2014 11:11:28  
  
 Data Format = 1D COMPLEX  
 Dim Size = 26214  
 Dim Title = Proton  
 Dim Units = [ppm]  
 Dimensions = X  
 Site = JNM-ECM500  
 Spectrometer = DELTA2 NMR  
  
 Field Strength = 11.7473579[T] (500[MHz])  
 X Acq Duration = 3.49175808[s]  
 X Domain = 1H  
 X Freq = 500.15991521[MHz]  
 X Offset = 5.0[ppm]  
 X Points = 32768  
 X Prescans = 1  
 X Resolution = 0.28638868[Hz]  
 X Sweep = 9.38438438[kHz]  
 X Sweep Clipped = 7.50750751[kHz]  
 Irr Domain = Proton  
 Irr Freq = 500.15991521[MHz]  
 Irr Offset = 5.0[ppm]  
 Tri Domain = Proton  
 Tri Freq = 500.15991521[MHz]  
 Tri Offset = 5.0[ppm]  
 Clipped = FALSE  
 Scans = 8  
 Total Scans = 8  
  
 Relaxation Delay = 5[s]  
 Recvr Gain = 54  
 Temp Get = 22.1[degC]  
 X 90 Width = 11.6[us]  
 X Acq Time = 3.49175808[s]  
 X Angle = 45[deg]  
 X Atn = 4[deg]  
 X Pulse = 5.8[us]  
 Irr Mode = Off  
 Tri Mode = Off  
 Dante Presat = FALSE  
 Initial Wait = 1[s]  
 Repetition Time = 8.49175808[s]

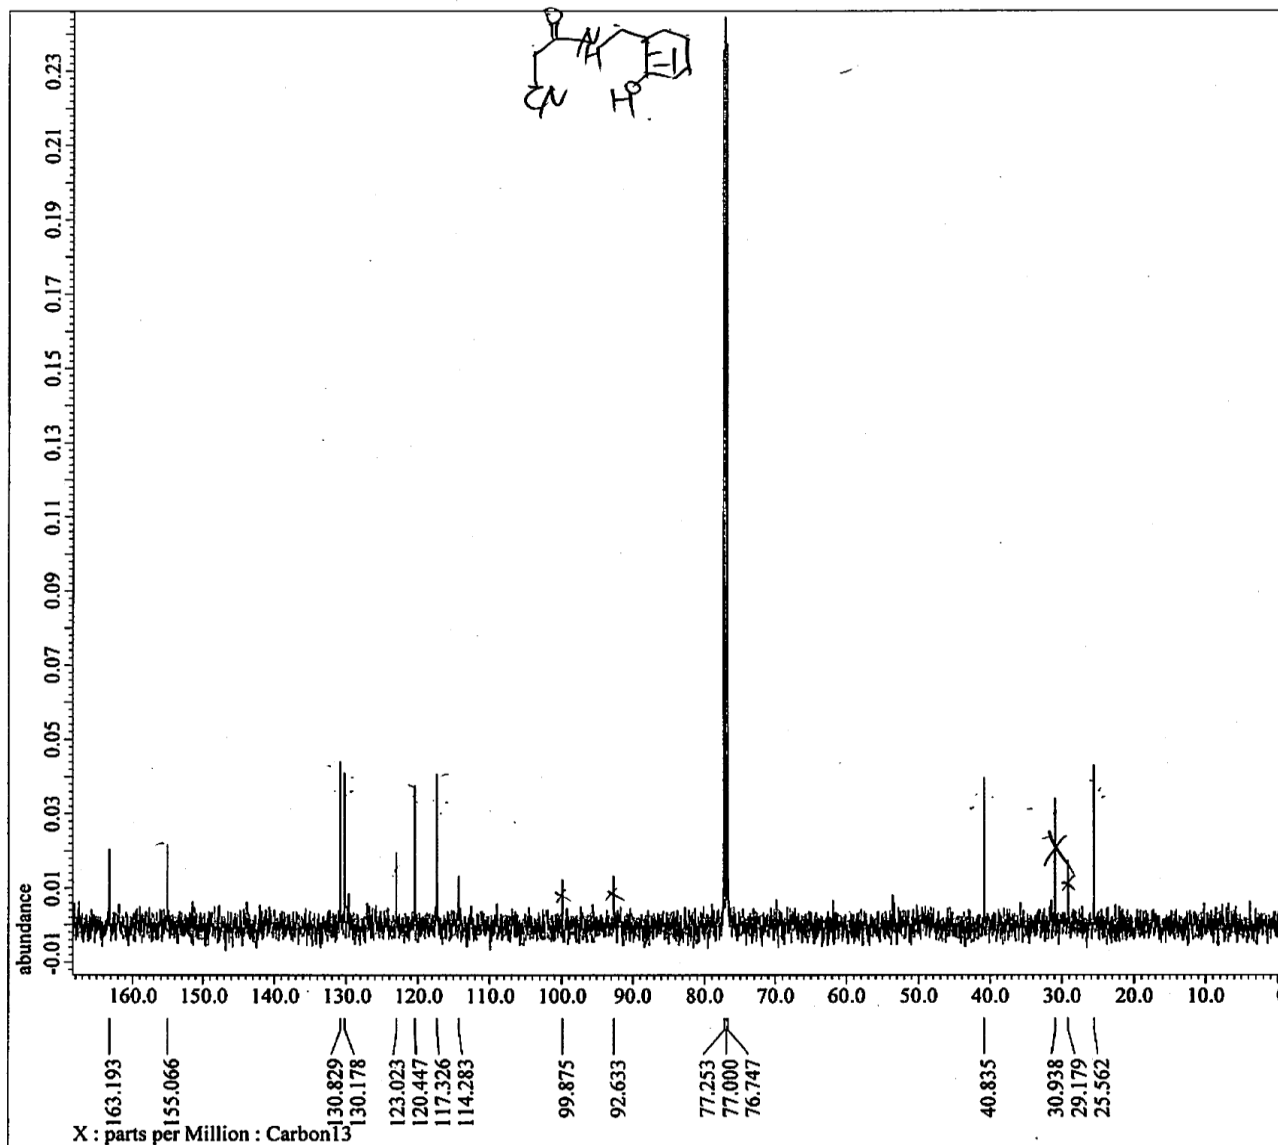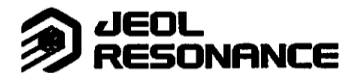

Filename = LI\_hul40228C-1-1-5.jdf  
 Author = delta  
 Experiment = carbon.jxp  
 Sample\_Id = LI  
 Solvent = CHLOROFORM-D  
 Creation Time = 28-FEB-2014 12:21:19  
 Revision Time = 28-FEB-2014 12:45:07  
 Current Time = 28-FEB-2014 12:45:19  
  
 Data Format = 1D COMPLEX  
 Dim Size = 26214  
 Dim Title = Carbon13  
 Dim Units = [ppm]  
 Dimensions = X  
 Site = JNM-ECK500  
 Spectrometer = DELTA2\_NMR  
  
 Field Strength = 11.7473579[T] (500[MHz])  
 X\_Acq\_Duration = 0.81788928[s]  
 X\_Domain = 13C  
 X\_Freq = 125.76529768[MHz]  
 X\_Offset = 100[ppm]  
 X\_Points = 32768  
 X\_Prescans = 4  
 X\_Resolution = 1.22265938[Hz]  
 X\_Sweep = 40.06410256[kHz]  
 X\_Sweep\_Clipped = 32.05128205[kHz]  
 Irr\_Domain = Proton  
 Irr\_Freq = 500.15991521[MHz]  
 Irr\_Offset = 5.0[ppm]  
 Clipped = FALSE  
 Scans = 498  
 Total\_Scans = 498  
  
 Relaxation\_Delay = 2[s]  
 Recvr\_Gain = 46  
 Temp\_Got = 22.6[dC]  
 X\_90\_Width = 9[us]  
 X\_Acq\_Time = 0.81788928[s]  
 X\_Angle = 30[deg]  
 X\_Atn = 5.7[dB]  
 X\_Pulse = 3[us]  
 Irr\_Atn\_Dec = 21.987[dB]  
 Irr\_Atn\_Noe = 21.987[dB]  
 Irr\_Noise = WALTZ  
 Irr\_Fwidth = 92[us]  
 Decoupling = TRUE  
 Initial\_Wait = 1[s]  
 Noe = TRUE  
 Noe\_Time = 2[s]  
 Repetition\_Time = 2.81788928[s]

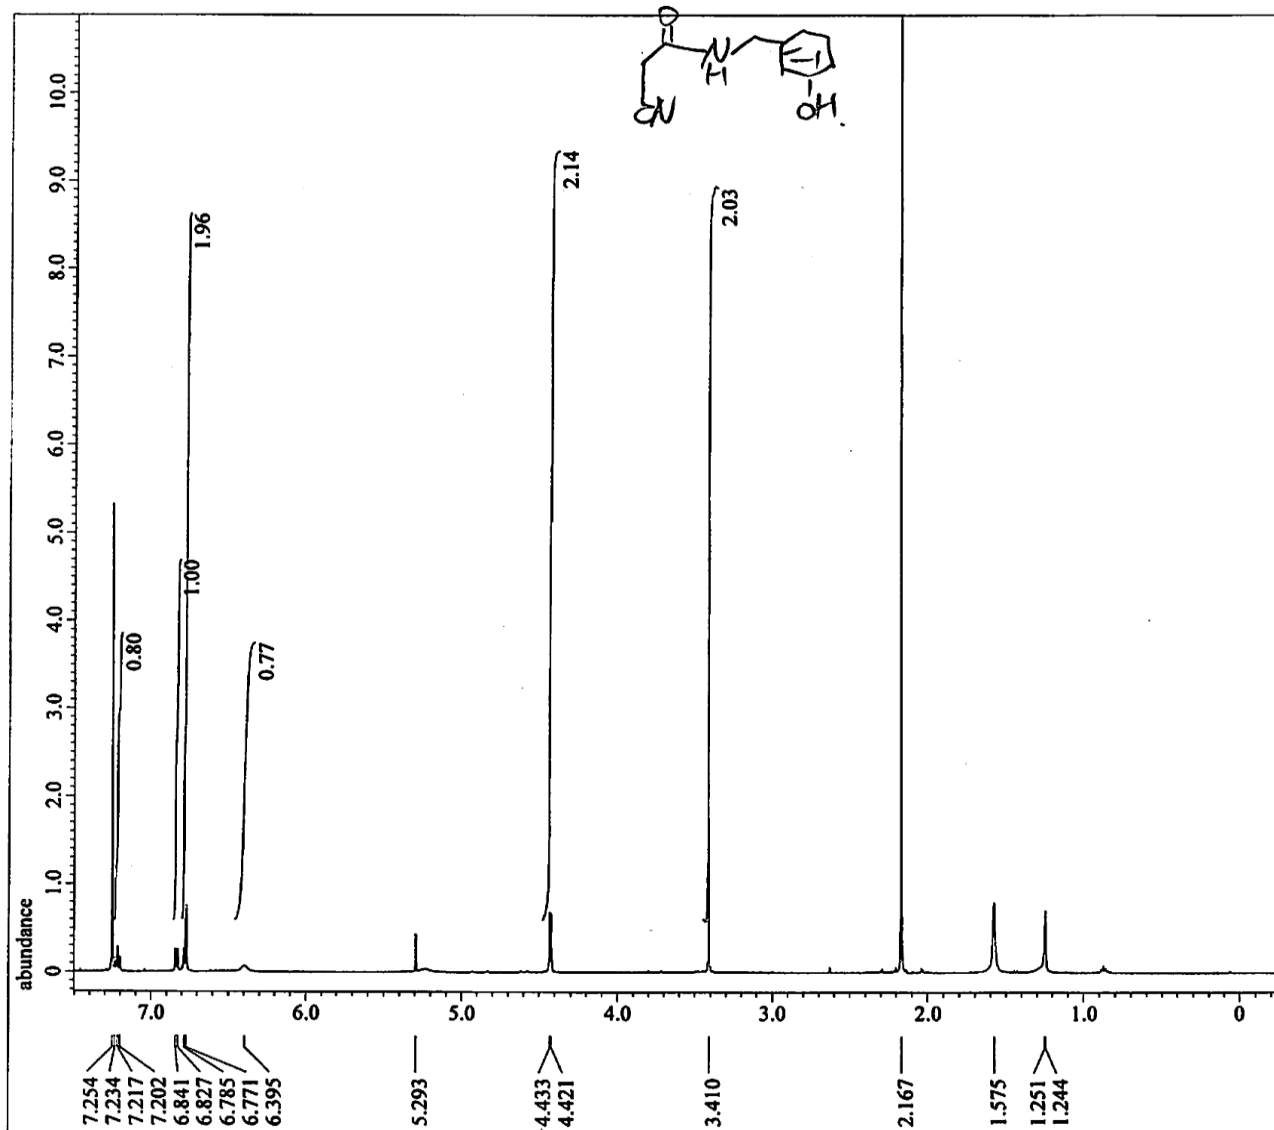

X : parts per Million : Proton

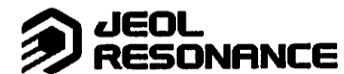

Filename = LI\_hu140121H-1-1-4.jdf  
 Author = delta  
 Experiment = proton.jxp  
 Sample Id = LI  
 Solvent = CHLOROFORM-D  
 Creation Time = 21-JAN-2014 17:51:22  
 Revision Time = 21-JAN-2014 17:53:54  
 Current Time = 21-JAN-2014 17:54:02  
 Comment = kobayashi-p.67-Fr.5  
 Data Format = 1D COMPLEX  
 Dim Size = 26214  
 Dim Title = Proton  
 Dim Units = [ppm]  
 Dimensions = X  
 Site = JNM-ECX500  
 Spectrometer = DELTA2\_NMR  
 Field Strength = 11.7473579[T] (500[MHz])  
 X\_Acq\_Duration = 3.49175808[s]  
 X\_Domain = 1H  
 X\_Freq = 500.15991521[MHz]  
 X\_Offset = 5.0[ppm]  
 X\_Points = 32768  
 X\_Prescans = 1  
 X\_Resolution = 0.28638868[Hz]  
 X\_Sweep = 9.38438438[kHz]  
 X\_Sweep\_Clipped = 7.50750751[kHz]  
 Irr\_Domain = Proton  
 Irr\_Freq = 500.15991521[MHz]  
 Irr\_Offset = 5.0[ppm]  
 Tri\_Domain = Proton  
 Tri\_Freq = 500.15991521[MHz]  
 Tri\_Offset = 5.0[ppm]  
 Clipped = FALSE  
 Scans = 8  
 Total\_Scans = 8  
 Relaxation\_Delay = 5[s]  
 Recvr\_Gain = 54  
 Temp\_Got = 22.3[dC]  
 X\_90\_Width = 11.6[us]  
 X\_Acq\_Time = 3.49175808[s]  
 X\_Angle = 45[deg]  
 X\_Atn = 4[dB]  
 X\_Pulse = 5.8[us]  
 Irr\_Mode = Off  
 Tri\_Mode = Off  
 Dante\_Preset = FALSE  
 Initial\_Wait = 1[s]  
 Repetition\_Time = 8.49175808[s]

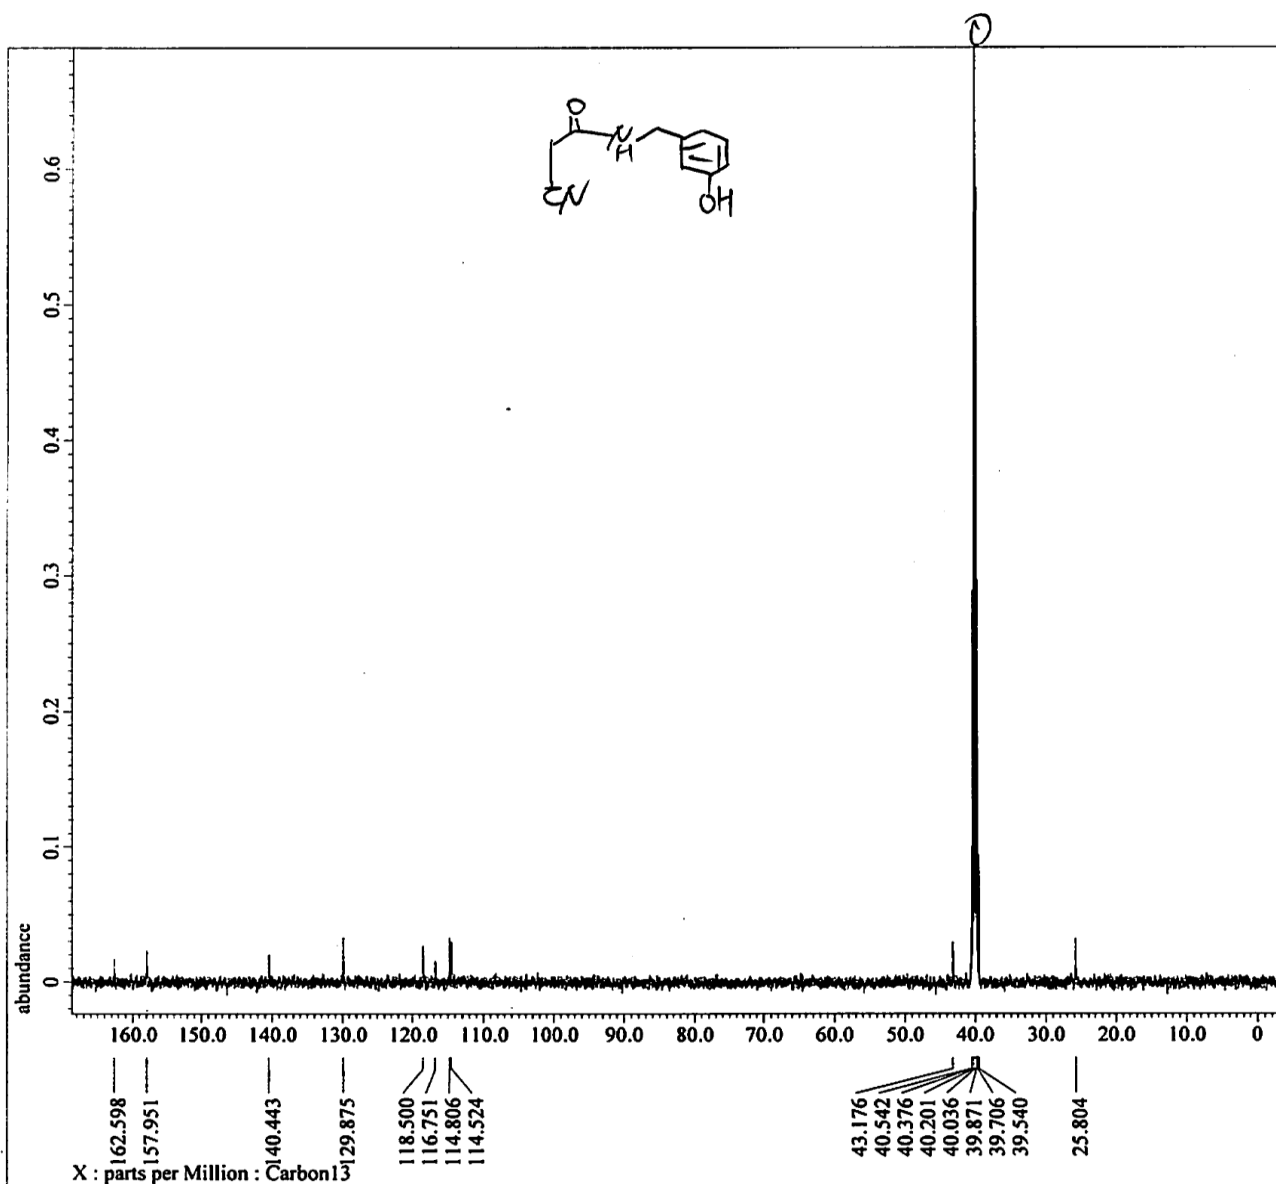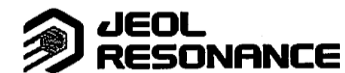

```

Filename      = L1_hu140430C-1-1-2.jdf
Author       = delta
Experiment    = carbon.jpg
Sample Id     = L1
Solvent       = DMSO-D6
Creation Time = 30-APR-2014 10:28:56
Revision Time = 30-APR-2014 10:45:22
Current Time  = 30-APR-2014 10:45:37

Data Format    = 1D COMPLEX
Dim Size      = 26214
Dim Title     = Carbon13
Dim Units     = [ppm]
Dimensions    = X
Site          = JNM-ECX500
Spectrometer  = DELTA2_NMR

Field Strength = 11.7473579[T] (500[MHz])
X_Acq_Duration = 0.81788928[s]
X_Domain       = 13C
X_Freq         = 125.76529768[MHz]
X_Offset       = 100[ppm]
X_Points       = 32768
X_Proscans     = 4
X_Resolution   = 1.22265938[Hz]
X_Sweep        = 40.06410256[kHz]
X_Sweep_Clipped = 32.05128205[kHz]
Irr_Domain     = Proton
Irr_Freq       = 500.15991521[MHz]
Irr_Offset     = 5.0[ppm]
Clipped        = TRUE
Scans          = 365
Total_Scans    = 365

Relaxation Delay = 2[s]
Recvr Gain      = 46
Temp_Got        = 23.1[degC]
X_90_Width      = 9[us]
X_Acq_Time      = 0.81788928[s]
X_Angle         = 30[deg]
X_Atn           = 5.7[dB]
X_Pulse         = 3[us]
Irr_Atn_Dec     = 21.987[dB]
Irr_Atn_Noe     = 21.987[dB]
Irr_Noise       = WALTZ
Irr_Pwidth      = 92[us]
Decoupling      = TRUE
Initial_Wait    = 1[s]
Noe              = TRUE
Noe_Time        = 2[s]
Repetition_Time = 2.81788928[s]
  
```

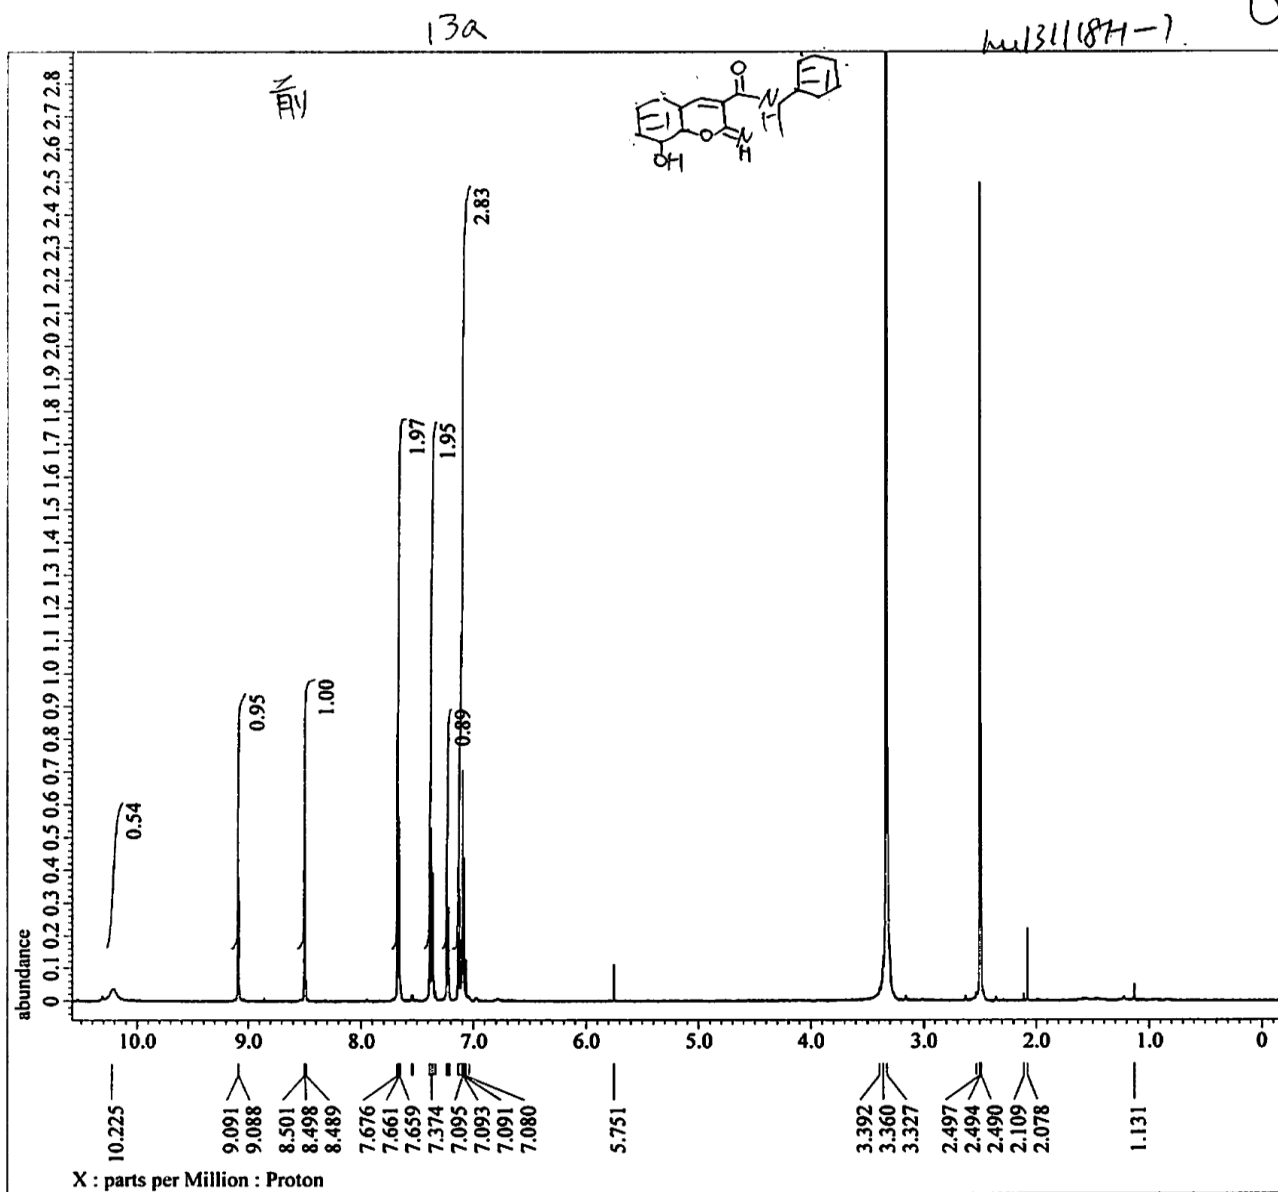

Filename = LI\_bul31118H-2-1-6.jdf  
 Author = delta  
 Experiment = proton.jpg  
 Sample Id = LI  
 Solvent = DMSO-D6  
 Creation Time = 18-NOV-2013 18:15:16  
 Revision Time = 18-NOV-2013 18:18:39  
 Current Time = 18-NOV-2013 18:18:56

Data Format = 1D COMPLEX  
 Dim Size = 26214  
 Dim Title = Proton  
 Dim Units = [ppm]  
 Dimensions = X  
 Site = JNM-ECK500  
 Spectrometer = DELTA2 NMR

Field Strength = 11.7473579[T] (500[Mhz])  
 X Acq Duration = 3.49175808[s]  
 X Domain = 1H  
 X Freq = 500.15991521[Mhz]  
 X Offset = 5.0[ppm]  
 X Points = 32768  
 X Prescans = 1  
 X Resolution = 0.28638868[Hz]  
 X Sweep = 9.38438438[kHz]  
 X Sweep Clipped = 7.50750751[kHz]  
 Irr Domain = Proton  
 Irr Freq = 500.15991521[Mhz]  
 Irr Offset = 5.0[ppm]  
 Tri Domain = Proton  
 Tri Freq = 500.15991521[Mhz]  
 Tri Offset = 5.0[ppm]  
 Clipped = FALSE  
 Scans = 7  
 Total Scans = 7

Relaxation Delay = 5[s]  
 Recvr Gain = 54  
 Temp Get = 20.9[dc]  
 X 90 Width = 11.6[us]  
 X Acq Time = 3.49175808[s]  
 X Angle = 45[deg]  
 X Atn = 4[db]  
 X Pulse = 5.8[us]  
 Irr Mode = Off  
 Tri Mode = Off  
 Dante Presat = FALSE  
 Initial Wait = 1[s]  
 Repetition Time = 8.49175808[s]

13a

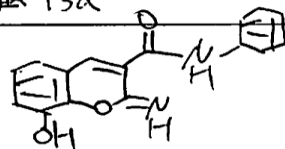

0

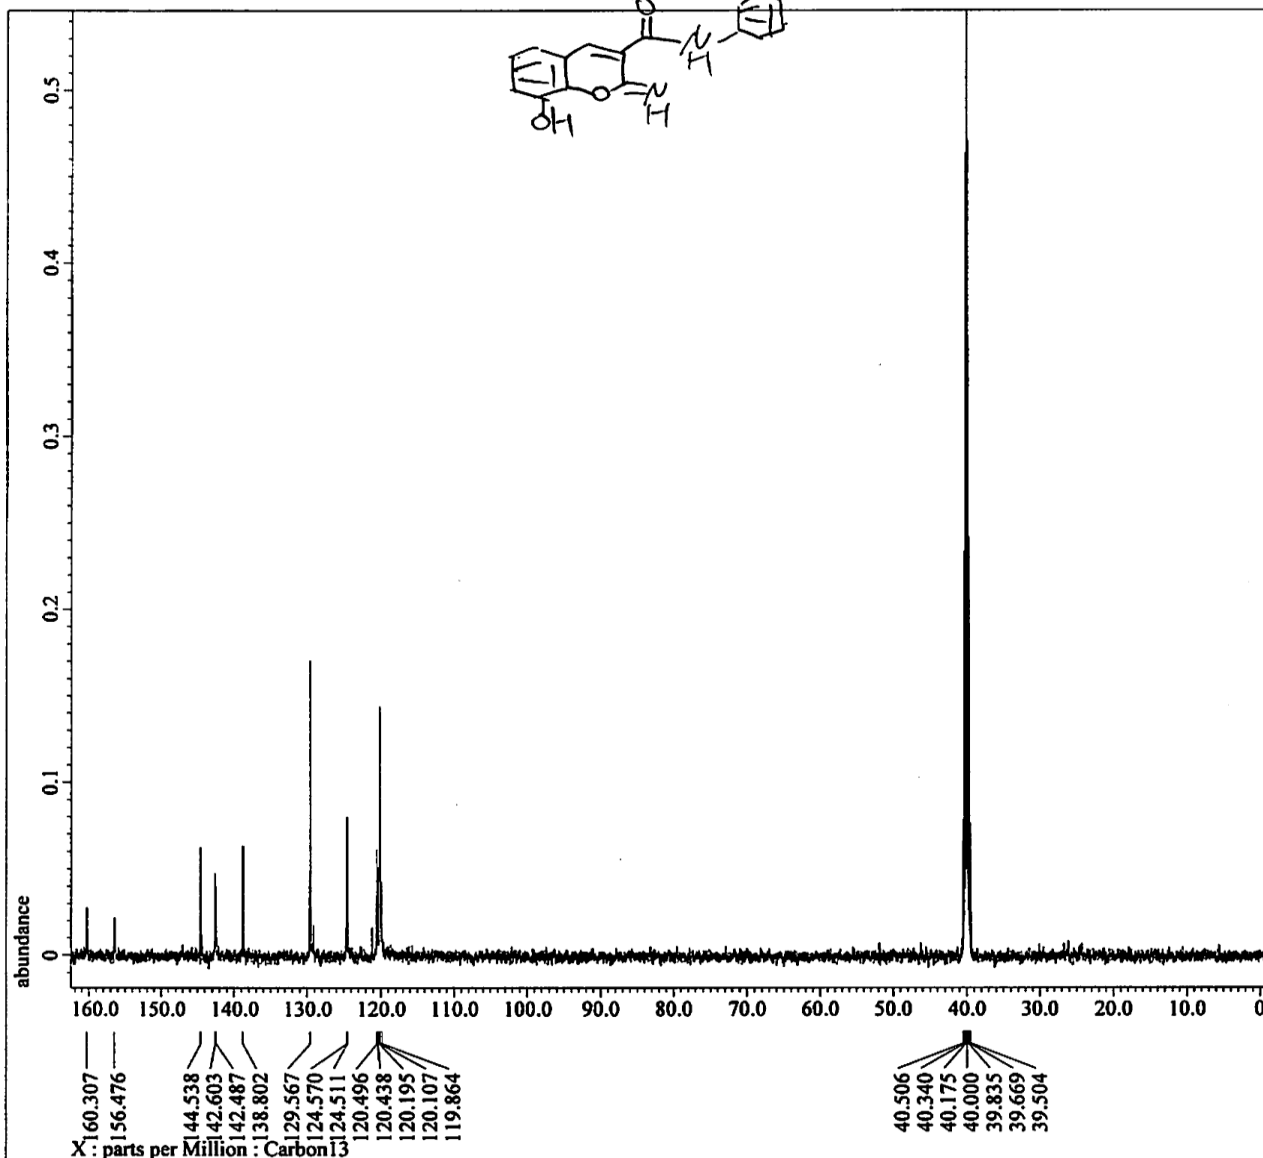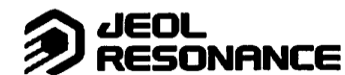

Filename = L1\_hu140205C-3-1-5.jdf  
 Author = delta  
 Experiment = carbon.jpg  
 Sample Id = L1  
 Solvent = DMSO-D6  
 Creation Time = 5-FEB-2014 14:16:21  
 Revision Time = 5-FEB-2014 14:34:09  
 Current Time = 5-FEB-2014 14:34:38  
 Comment = p.67-Fr.5  
 Data Format = 1D COMPLEX  
 Dim Size = 26214  
 Dim Title = Carbon13  
 Dim Units = [ppm]  
 Dimensions = X  
 Site = JNM-ECX500  
 Spectrometer = DELTA2\_NMR  
 Field Strength = 11.7473579[T] (500[MHz])  
 X\_Acq\_Duration = 0.81788928[s]  
 X\_Domain = 13C  
 X\_Freq = 125.76529768[MHz]  
 X\_Offset = 100[ppm]  
 X\_Points = 32768  
 X\_Prescans = 4  
 X\_Resolution = 1.22265938[Hz]  
 X\_Sweep = 40.06410256[kHz]  
 X\_Sweep\_Clipped = 32.05128205[kHz]  
 Irr\_Domain = Proton  
 Irr\_Freq = 500.15991521[MHz]  
 Irr\_Offset = 5.0[ppm]  
 Clipped = FALSE  
 Scans = 561  
 Total\_Scans = 561  
 Relaxation\_Delay = 1[s]  
 Recvr Gain = 46  
 Temp\_Got = 23[dC]  
 X\_90\_Width = 9[us]  
 X\_Acq\_Time = 0.81788928[s]  
 X\_Angle = 30[deg]  
 X\_Atn = 5.7[dB]  
 X\_Pulse = 3[us]  
 Irr\_Atn\_Dec = 21.987[dB]  
 Irr\_Atn\_Noe = 21.987[dB]  
 Irr\_Noise = WALTZ  
 Irr\_Pwidth = 92[us]  
 Decoupling = TRUE  
 Initial\_Wait = 1[s]  
 Noe = TRUE  
 Noe\_Time = 1[s]  
 Repetition\_Time = 1.81788928[s]

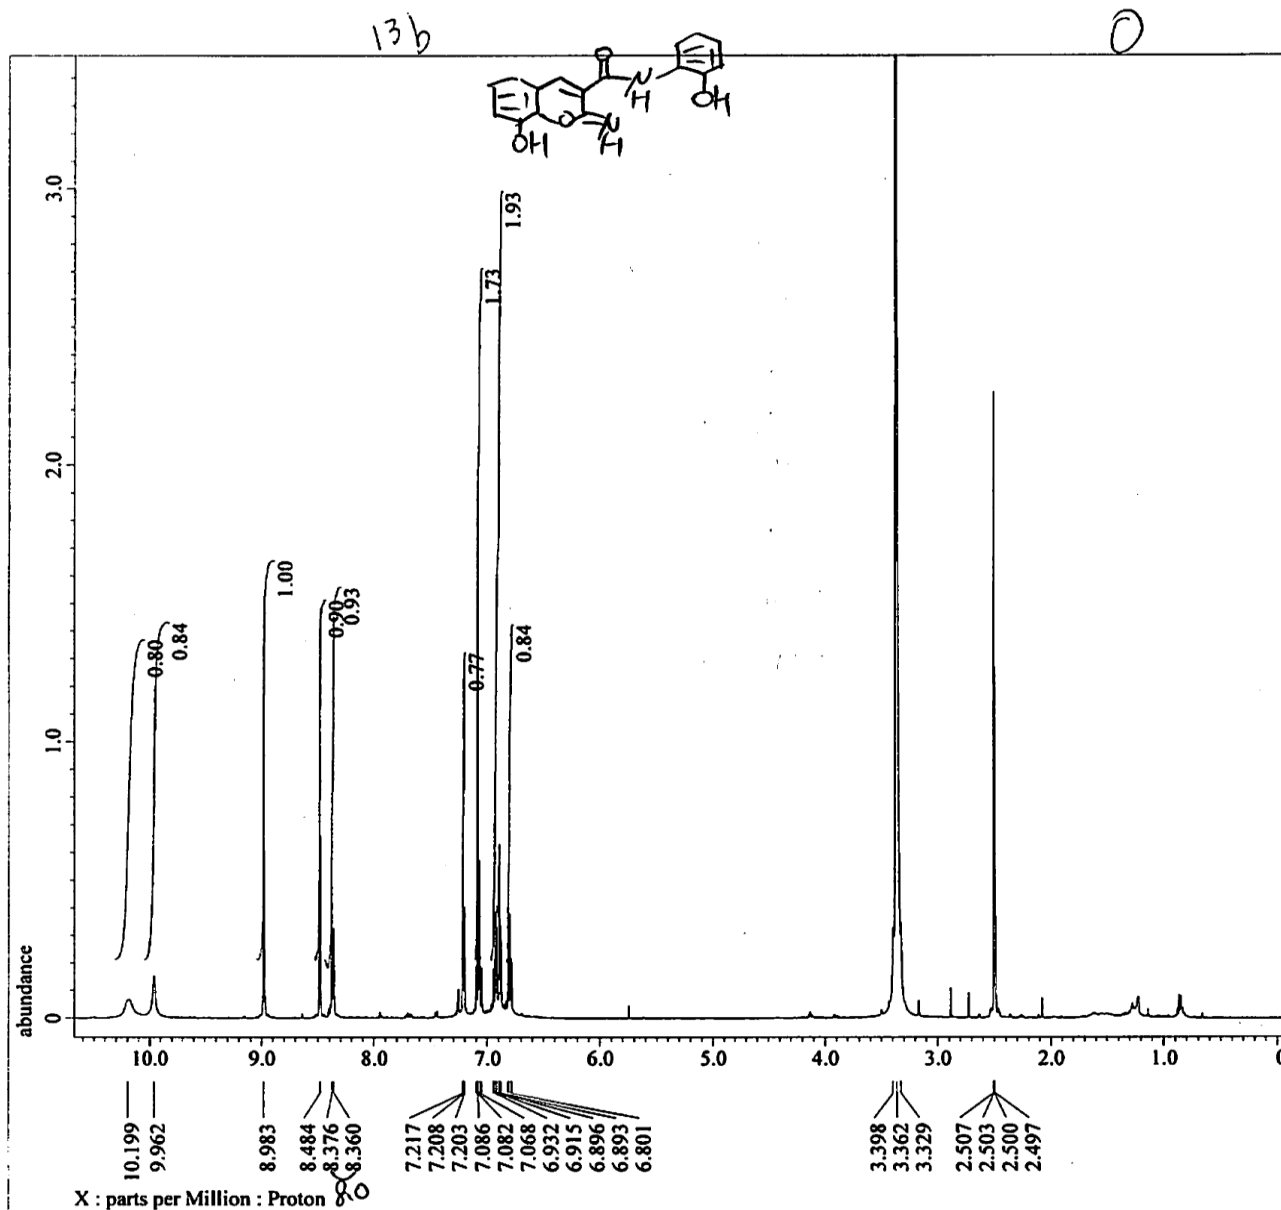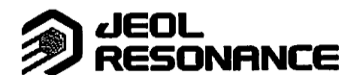

Filename = L1\_hul40501H-1-1-5.jdf  
 Author = delta  
 Experiment = proton.jxp  
 Sample Id = L1  
 Solvent = DMSO-D6  
 Creation Time = 1-MAY-2014 15:37:17  
 Revision Time = 1-MAY-2014 15:39:09  
 Current Time = 1-MAY-2014 15:39:27  
  
 Data Format = 1D COMPLEX  
 Dim Size = 13107  
 Dim Title = Proton  
 Dim Units = [ppm]  
 Dimensions = X  
 Site = JNM-ECK500  
 Spectrometer = DELTA2\_NMR  
  
 Field Strength = 11.7473579[T] (500[MHz])  
 X Acq Duration = 1.74587904[s]  
 X Domain = 1H  
 X Freq = 500.15991521[MHz]  
 X Offset = 5.0[ppm]  
 X Points = 16384  
 X Prescans = 1  
 X Resolution = 0.57277737[Hz]  
 X Sweep = 9.38438438[kHz]  
 X Sweep Clipped = 7.50750751[kHz]  
 Irr Domain = Proton  
 Irr Freq = 500.15991521[MHz]  
 Irr Offset = 5.0[ppm]  
 Tri Domain = Proton  
 Tri Freq = 500.15991521[MHz]  
 Tri Offset = 5.0[ppm]  
 Clipped = FALSE  
 Scans = 8  
 Total Scans = 8  
  
 Relaxation Delay = 5[s]  
 Recvr Gain = 38  
 Temp Set = 22.7[dC]  
 X 90 Width = 11.6[us]  
 X Acq Time = 1.74587904[s]  
 X Angle = 45[deg]  
 X Atn = 4[dB]  
 X Pulse = 5.8[us]  
 Irr Mode = Off  
 Tri Mode = Off  
 Dante Presat = FALSE  
 Initial Wait = 1[s]  
 Repetition Time = 6.74587904[s]

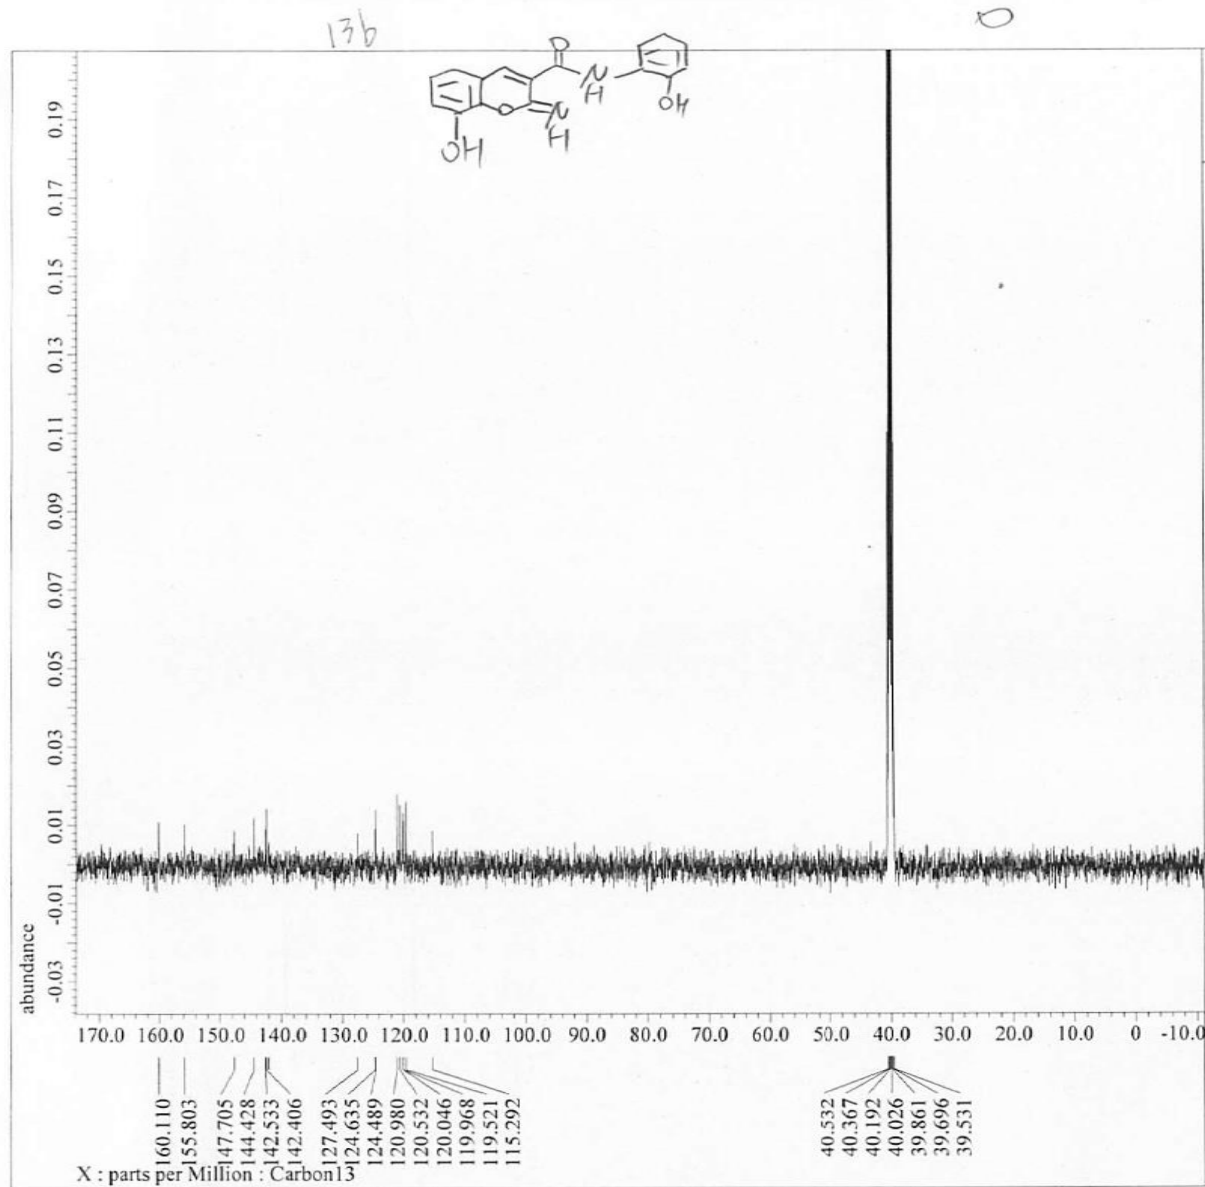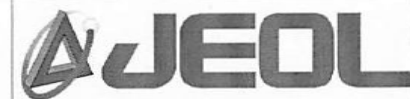

Filename = C:\Users\ws2-DATA\L1\_hul  
Author = delta  
Experiment = carbon.jsp  
Sample Id = L1  
Solvent = DMSO-D6  
Creation Time = 1-MAY-2014 12:38:09  
Revision Time = 1-MAY-2014 13:03:49  
Current Time = 1-MAY-2014 13:04:04

Data Format = 1D COMPLEX  
Dim Size = 26214  
Dim Title = Carbon13  
Dim Units = [ppm]  
Dimensions = X  
Site = JNM-ECX500  
Spectrometer = DELTA2\_NMR

Field Strength = 11.7473579[T] (500[MHz])  
X\_Acq\_Duration = 0.81788928[s]  
X\_Domain = 13C  
X\_Freq = 125.76529768[MHz]  
X\_Offset = 100[ppm]  
X\_Points = 32768  
X\_Prescans = 4  
X\_Resolution = 1.22265938[Hz]  
X\_Sweep = 40.06410256[kHz]  
X\_Sweep\_Clipped = 32.05128205[kHz]  
Irr\_Domain = Proton  
Irr\_Freq = 500.15991521[MHz]  
Irr\_Offset = 5.0[ppm]  
Clipped = FALSE  
Scans = 502.0  
Total\_Scans = 502.0

Relaxation\_Delay = 2[s]  
Recvr\_Gain = 46  
Temp\_Get = 23.1[degC]  
X\_90\_Width = 9[us]  
X\_Acq\_Time = 0.81788928[s]  
X\_Angle = 30[deg]  
X\_Atn = 5.7[dB]  
X\_Pulse = 3[us]  
Irr\_Atn\_Dec = 21.987[dB]  
Irr\_Atn\_No = 21.987[dB]  
Irr\_Noise = WALTZ  
Irr\_Pwidth = 92[us]  
Decoupling = TRUE  
Initial\_Wait = 1[s]  
Noe = TRUE  
Noe\_Time = 2[s]  
Repetition\_Time = 2.81788928[s]



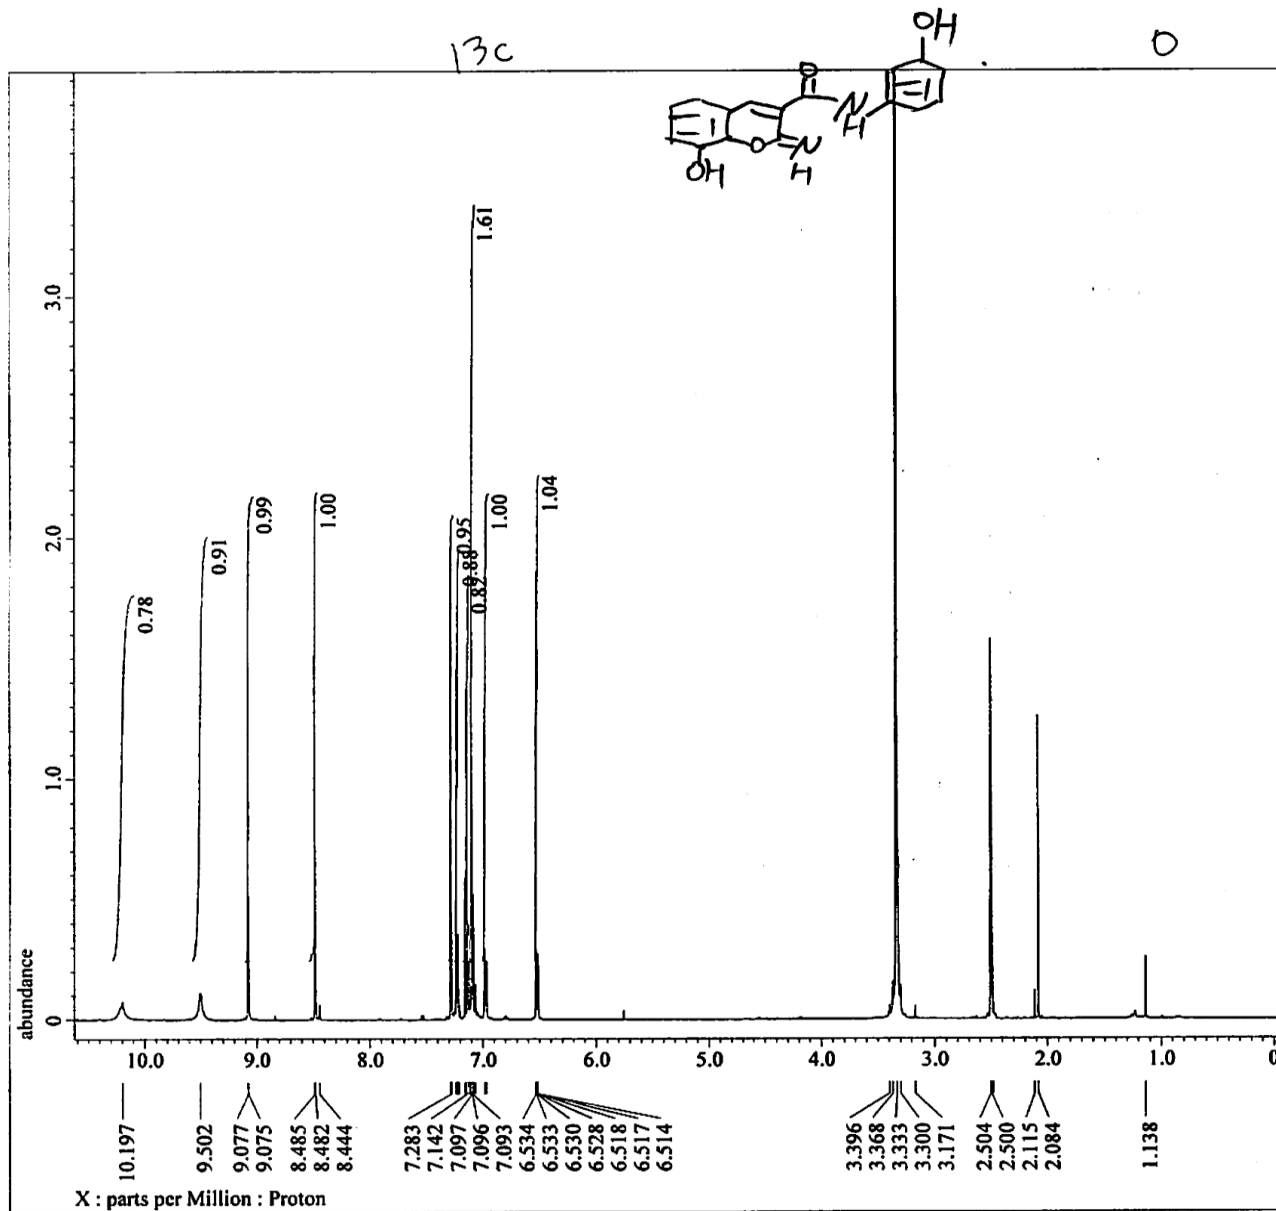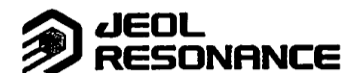

Filename = L1\_hu131129H-1-1-5.jdf  
 Author = delta  
 Experiment = proton.jxp  
 Sample Id = L1  
 Solvent = DMSO-D6  
 Creation Time = 29-NOV-2013 12:24:28  
 Revision Time = 29-NOV-2013 12:27:34  
 Current Time = 29-NOV-2013 12:27:54  
 Comment = 2-p.43-Fr.22-46  
 Data Format = 1D COMPLEX  
 Dim Size = 26214  
 Dim Title = Proton  
 Dim Units = [ppm]  
 Dimensions = X  
 Site = JNM-ECX500  
 Spectrometer = DELTA2 NMR  
 Field Strength = 11.7473579[T] (500[MHz])  
 X Acq\_Duration = 3.49175808[s]  
 X Domain = 1H  
 X Freq = 500.15991521[MHz]  
 X Offset = 5.0[ppm]  
 X Points = 32768  
 X Prescans = 1  
 X Resolution = 0.28638868[Hz]  
 X Sweep = 9.38438438[kHz]  
 X Sweep\_Clippped = 7.50750751[kHz]  
 Irr\_Domain = Proton  
 Irr\_Freq = 500.15991521[MHz]  
 Irr\_Offset = 5.0[ppm]  
 Tri\_Domain = Proton  
 Tri\_Freq = 500.15991521[MHz]  
 Tri\_Offset = 5.0[ppm]  
 Clipped = FALSE  
 Scans = 8  
 Total\_Scans = 8  
 Relaxation\_Delay = 5[s]  
 Recvr\_Gain = 50  
 Temp\_Got = 22.2[degC]  
 X 90\_Width = 11.6[us]  
 X Acq\_Time = 3.49175808[s]  
 X Angle = 45[deg]  
 X Atn = 4[deg]  
 X Pulse = 5.8[us]  
 Irr\_Mode = OFF  
 Tri\_Mode = OFF  
 Dante\_Preset = FALSE  
 Initial\_Wait = 1[s]  
 Repetition\_Time = 8.49175808[s]

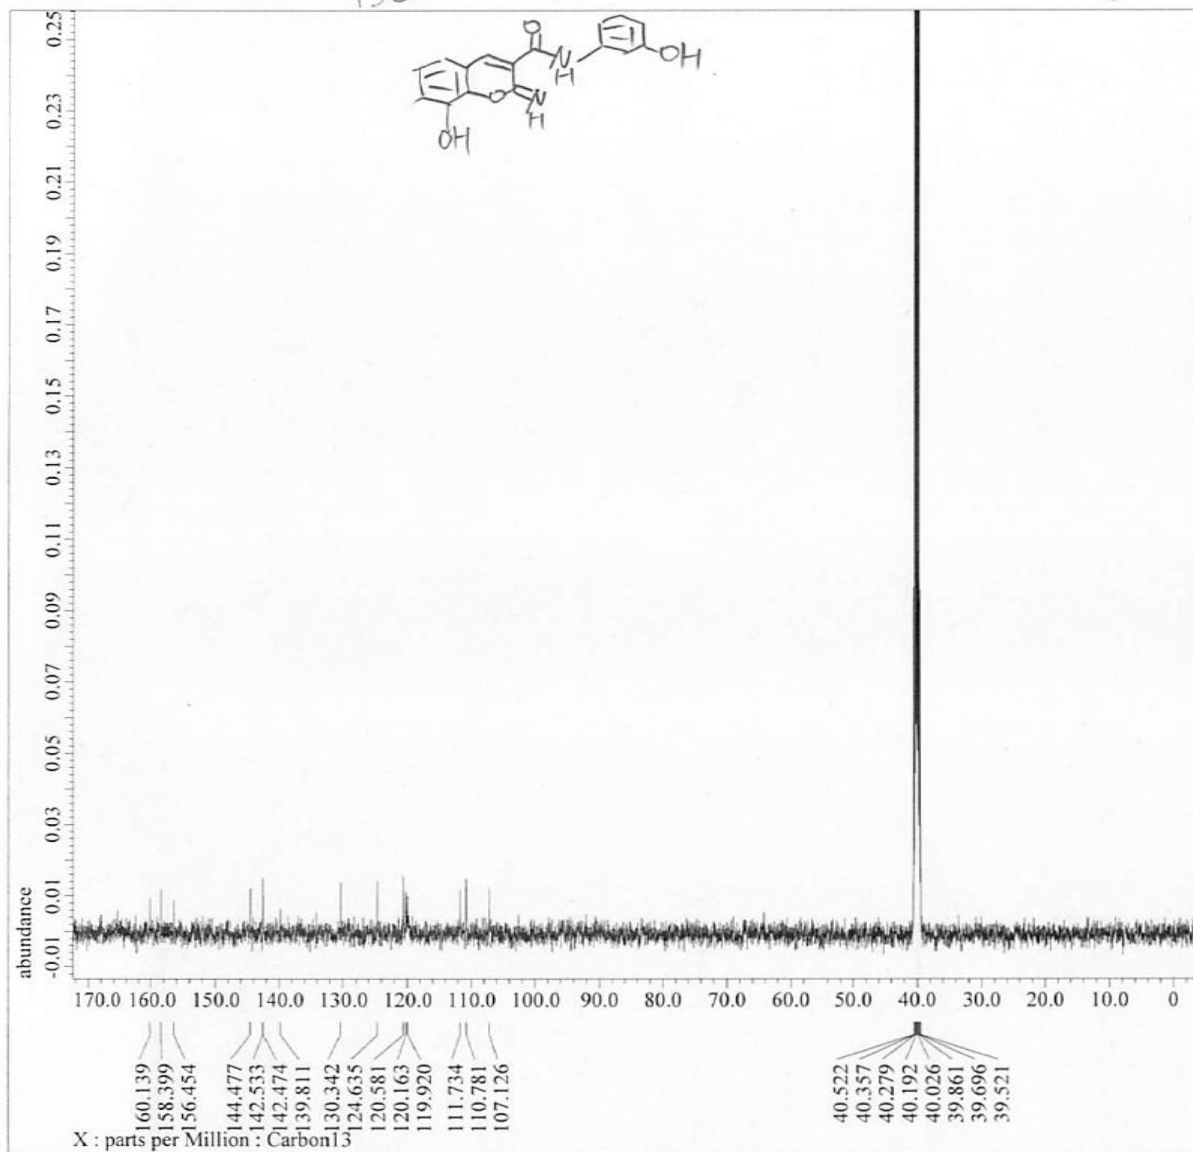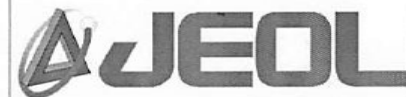

Filename = C:\Users\ws2-DATA\L1\_hul  
Author = delta  
Experiment = carbon.jpg  
Sample\_Id = L1  
Solvent = DMSO-D6  
Creation\_Time = 7-MAY-2014 10:27:12  
Revision\_Time = 7-MAY-2014 11:02:21  
Current\_Time = 7-MAY-2014 11:02:49

Data Format = 1D COMPLEX  
Dim\_Size = 26214  
Dim\_Title = Carbon13  
Dim\_Units = [ppm]  
Dimensions = X  
Site = JNM-ECX500  
Spectrometer = DELTA2 NMR

Field\_Strength = 11.7473579[T] (500[MHz])  
X\_Acq\_Duration = 0.81788928[s]  
X\_Domain = 13C  
X\_Freq = 125.76529768[MHz]  
X\_Offset = 100[ppm]  
X\_Points = 32768  
X\_Prescans = 4  
X\_Resolution = 1.22265938[Hz]  
X\_Sweep = 40.06410256[kHz]  
X\_Sweep\_Clipped = 32.05128205[kHz]  
Irr\_Domain = Proton  
Irr\_Freq = 500.15991521[MHz]  
Irr\_Offset = 5.0[ppm]  
Clipped = TRUE  
Scans = 658  
Total\_Scans = 658

Relaxation\_Delay = 2[s]  
Recvr\_Gain = 46  
Temp\_Get = 22[dC]  
X\_90\_Width = 9[us]  
X\_Acq\_Time = 0.81788928[s]  
X\_Angle = 30[deg]  
X\_Atn = 5.7[dB]  
X\_Pulse = 3[us]  
Irr\_Atn\_Dec = 21.987[dB]  
Irr\_Atn\_Noe = 21.987[dB]  
Irr\_Noise = WALTZ  
Irr\_Pwidth = 92[us]  
Decoupling = TRUE  
Initial\_Wait = 1[s]  
Noe = TRUE  
Noe\_Time = 2[s]  
Repetition\_Time = 2.81788928[s]

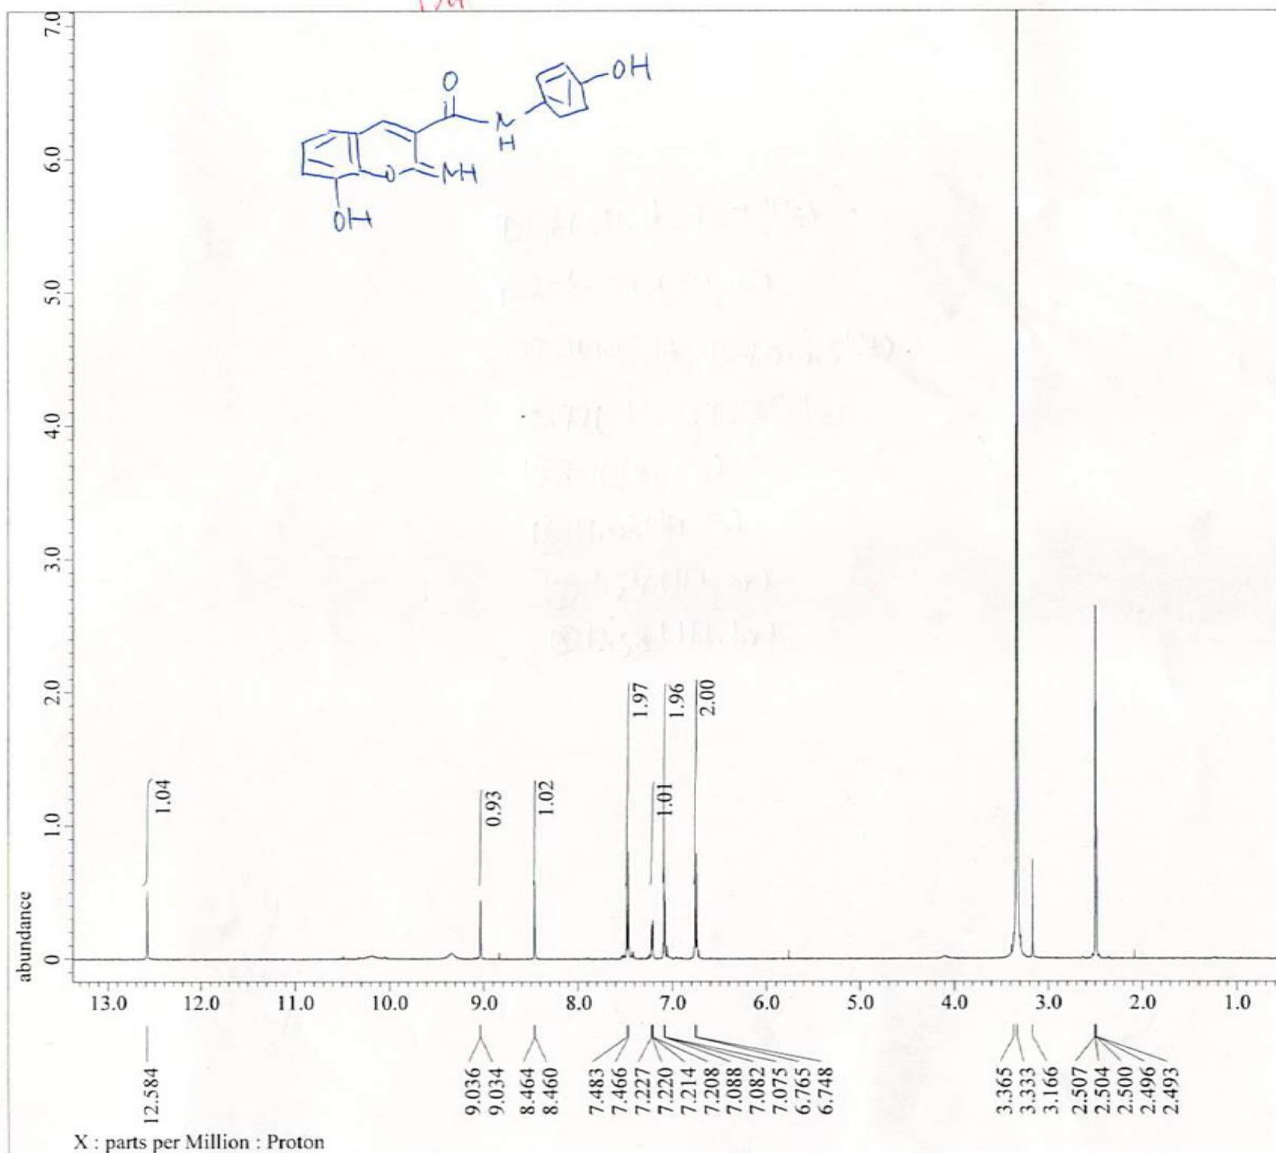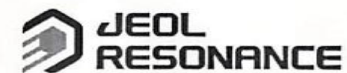

Filename = L1\_ifuku20131115-H01-1-4.j  
 Author = delta  
 Experiment = proton.jpg  
 Sample\_Id = L1  
 Solvent = DMSO-D6  
 Creation Time = 15-NOV-2013 13:25:42  
 Revision Time = 15-NOV-2013 13:31:04  
 Current Time = 15-NOV-2013 13:31:54

Data Format = 1D COMPLEX  
 Dim Size = 26214  
 Dim Title = Proton  
 Dim Units = [ppm]  
 Dimensions = X  
 Site = JNM-ECX500  
 Spectrometer = DELTA2 NMR

Field Strength = 11.7473579[T] (500 [MHz])  
 X Acq Duration = 2.61881856[s]  
 X Domain = 1H  
 X Freq = 500.15991521 [MHz]  
 X Offset = 5.0 [ppm]  
 X Points = 32768  
 X Prescans = 1  
 X Resolution = 0.38185158 [Hz]  
 X Sweep = 12.51251251 [kHz]  
 X Sweep\_Clippped = 10.01001001 [kHz]  
 Irr\_Domain = Proton  
 Irr\_Freq = 500.15991521 [MHz]  
 Irr\_Offset = 5.0 [ppm]  
 Tri\_Domain = Proton  
 Tri\_Freq = 500.15991521 [MHz]  
 Tri\_Offset = 5.0 [ppm]  
 Clipped = FALSE  
 Scans = 4  
 Total Scans = 4

Relaxation\_Delay = 5[s]  
 Recvr Gain = 52  
 Temp\_Get = 21.2 [dC]  
 X 90\_Width = 11.6 [us]  
 X Acq Time = 2.61881856[s]  
 X Angle = 45 [deg]  
 X Atn = 4 [dB]  
 X Pulse = 5.8 [us]  
 Irr\_Mode = Off  
 Tri\_Mode = Off  
 Dante\_Presat = FALSE  
 Initial\_Wait = 1[s]  
 Repetition\_Time = 7.61881856[s]

13d

D

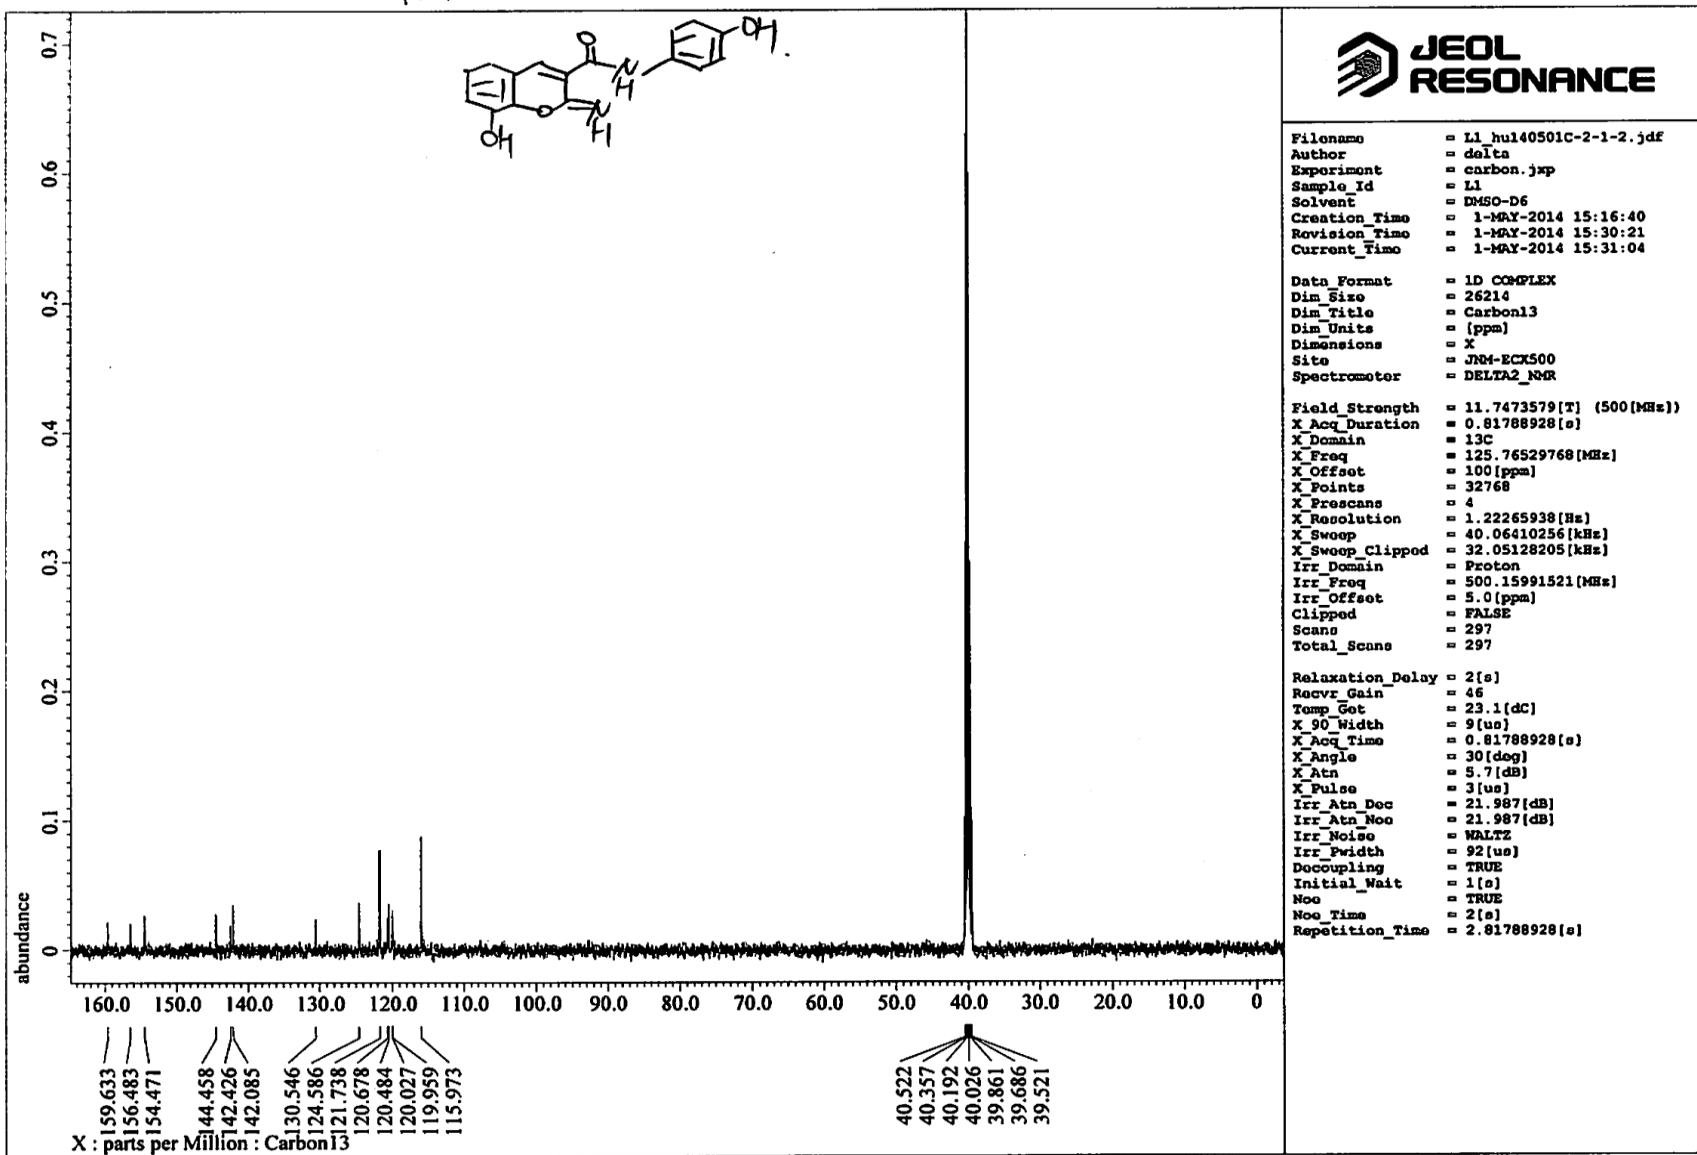

13e

CBR-5

0

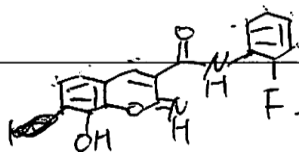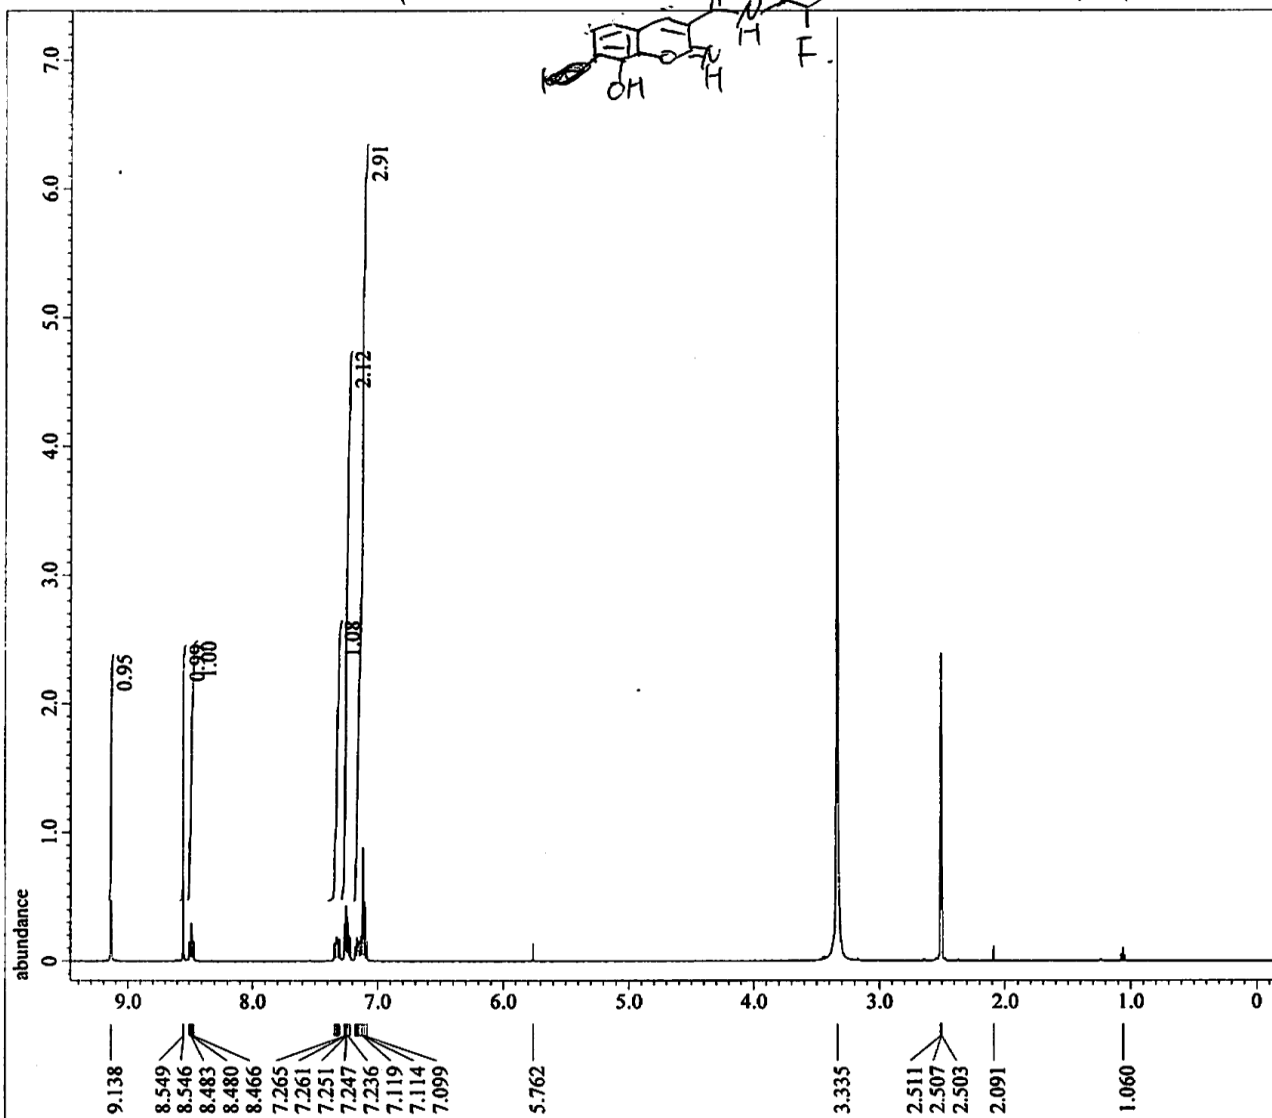

X : parts per Million : Proton

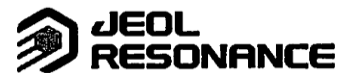

Filename = LI\_hul311228-1-1-4.jdf  
 Author = delta  
 Experiment = proton.jpg  
 Sample\_Id = LI  
 Solvent = DMSO-D6  
 Creation\_Time = 22-NOV-2013 14:43:37  
 Revision\_Time = 22-NOV-2013 14:48:42  
 Current\_Time = 22-NOV-2013 14:48:56

Data Format = 1D COMPLEX  
 Dim Size = 26214  
 Dim Title = Proton  
 Dim Units = [ppm]  
 Dimensions = X  
 Site = JNM-ECK500  
 Spectrometer = DELTA2 NMR

Field Strength = 11.7473579[T] (500[MHz])  
 X\_Acq\_Duration = 3.49175808[s]  
 X\_Domain = 1H  
 X\_Freq = 500.15991521[MHz]  
 X\_Offset = 5.0[ppm]  
 X\_Points = 32768  
 X\_Prescans = 1  
 X\_Resolution = 0.28638868[Hz]  
 X\_Sweep = 9.38438438[kHz]  
 X\_Sweep\_Clipped = 7.50750751[kHz]  
 Irr\_Domain = Proton  
 Irr\_Freq = 500.15991521[MHz]  
 Irr\_Offset = 5.0[ppm]  
 Tri\_Domain = Proton  
 Tri\_Freq = 500.15991521[MHz]  
 Tri\_Offset = 5.0[ppm]  
 Clipped = FALSE  
 Scans = 8  
 Total\_Scans = 8

Relaxation\_Delay = 5[s]  
 Recvr\_Gain = 54  
 Temp\_Got = 22.5[degC]  
 X\_90\_Width = 11.6[us]  
 X\_Acq\_Time = 3.49175808[s]  
 X\_Angle = 45[deg]  
 X\_Atn = 4[db]  
 X\_Pulse = 5.8[us]  
 Irr\_Mode = Off  
 Tri\_Mode = Off  
 Dante\_Present = FALSE  
 Initial\_Wait = 1[s]  
 Repetition\_Time = 8.49175808[s]

(21)

13c

0

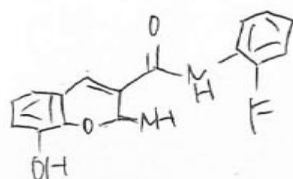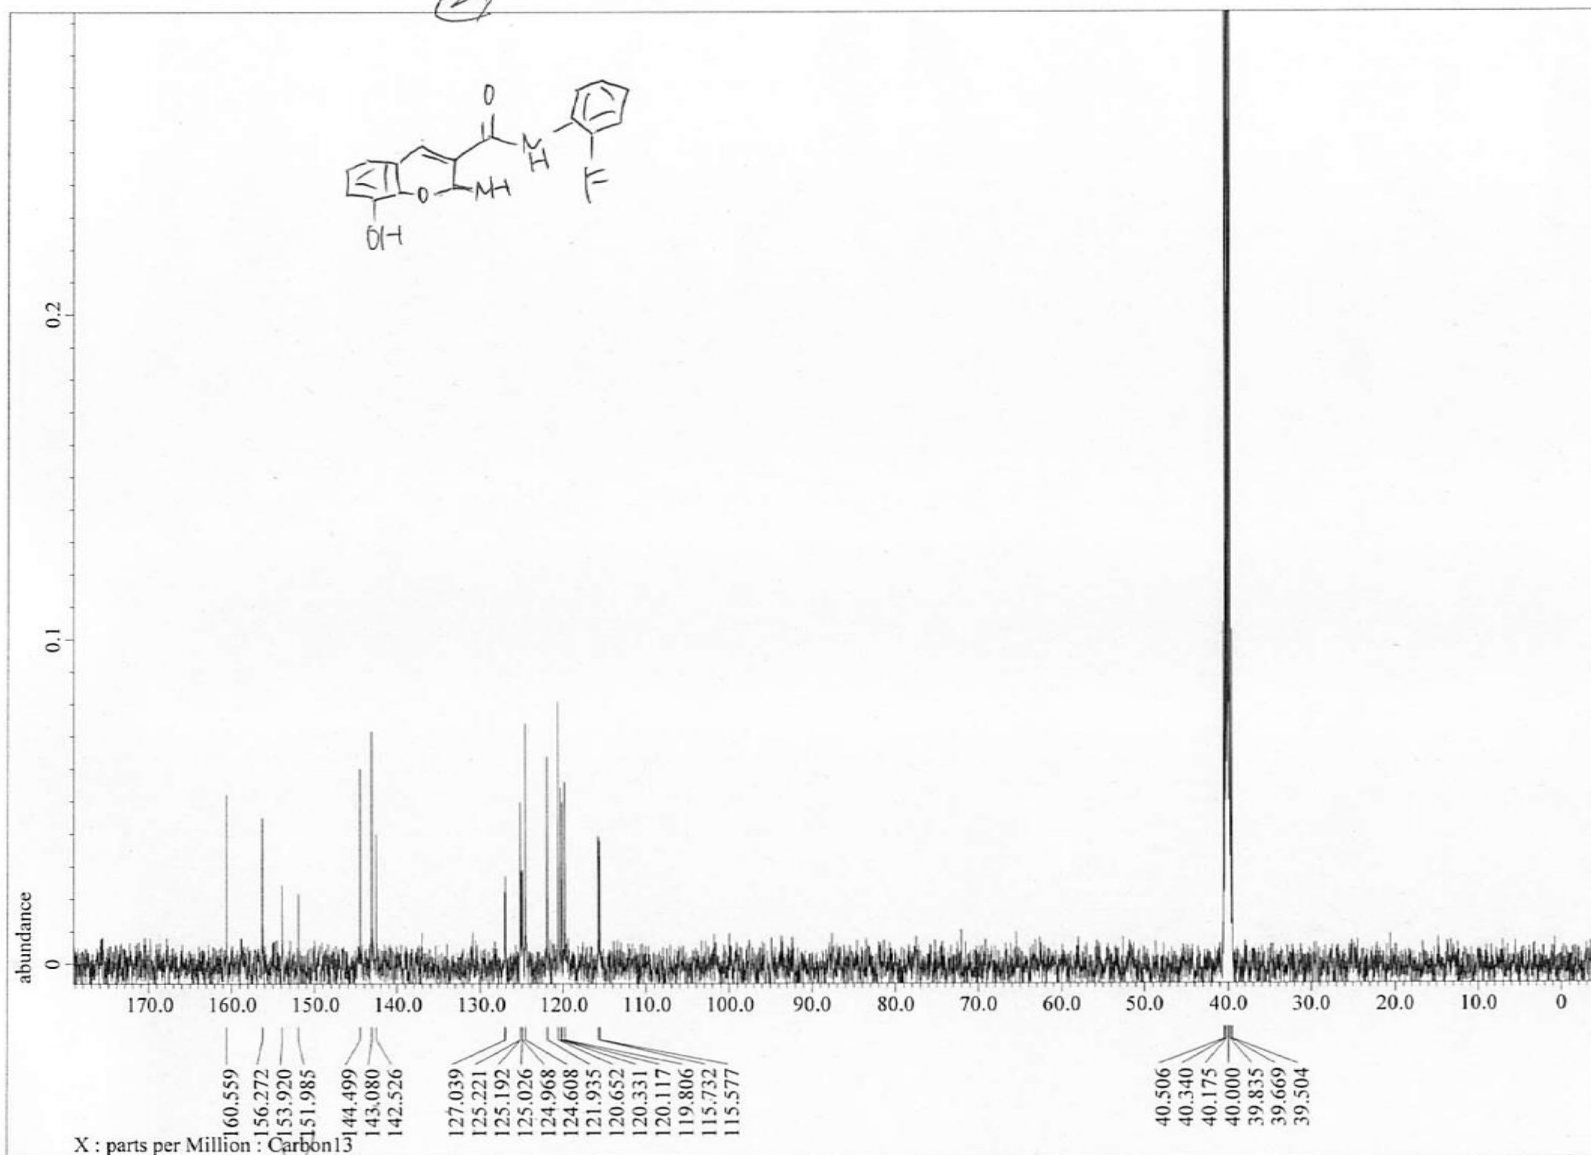

79.8

(21)

13c

0

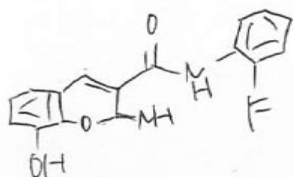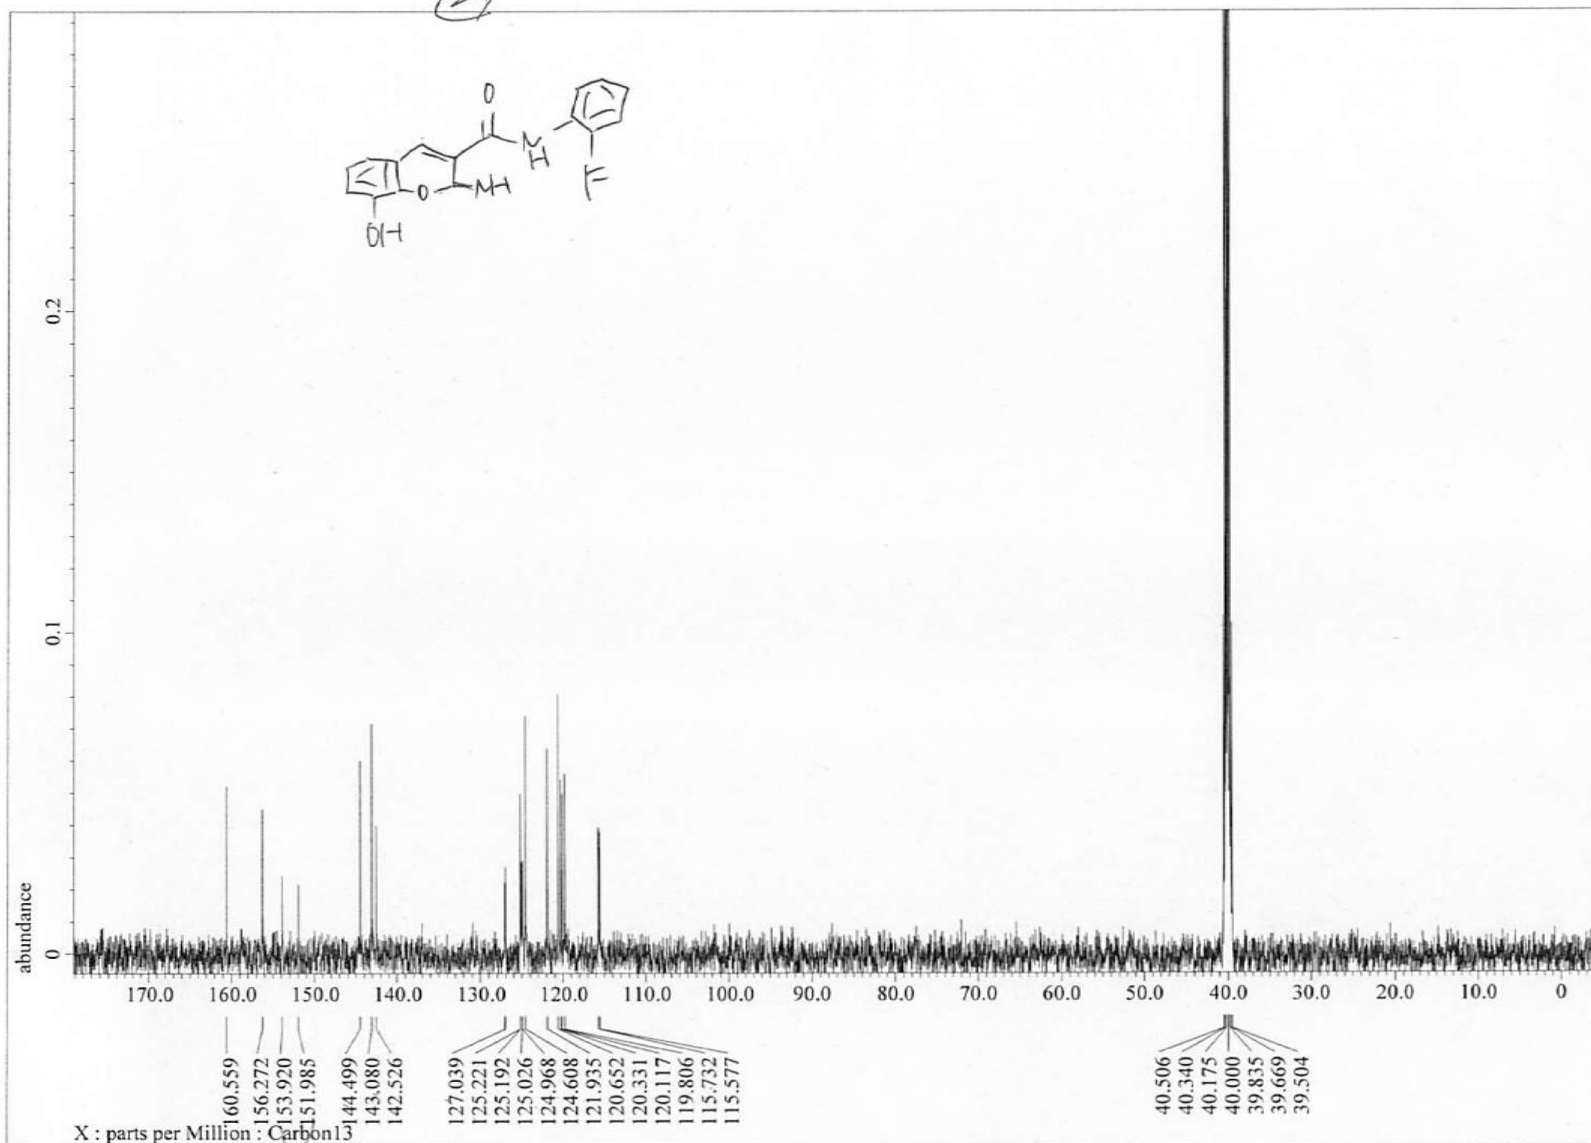

79.8

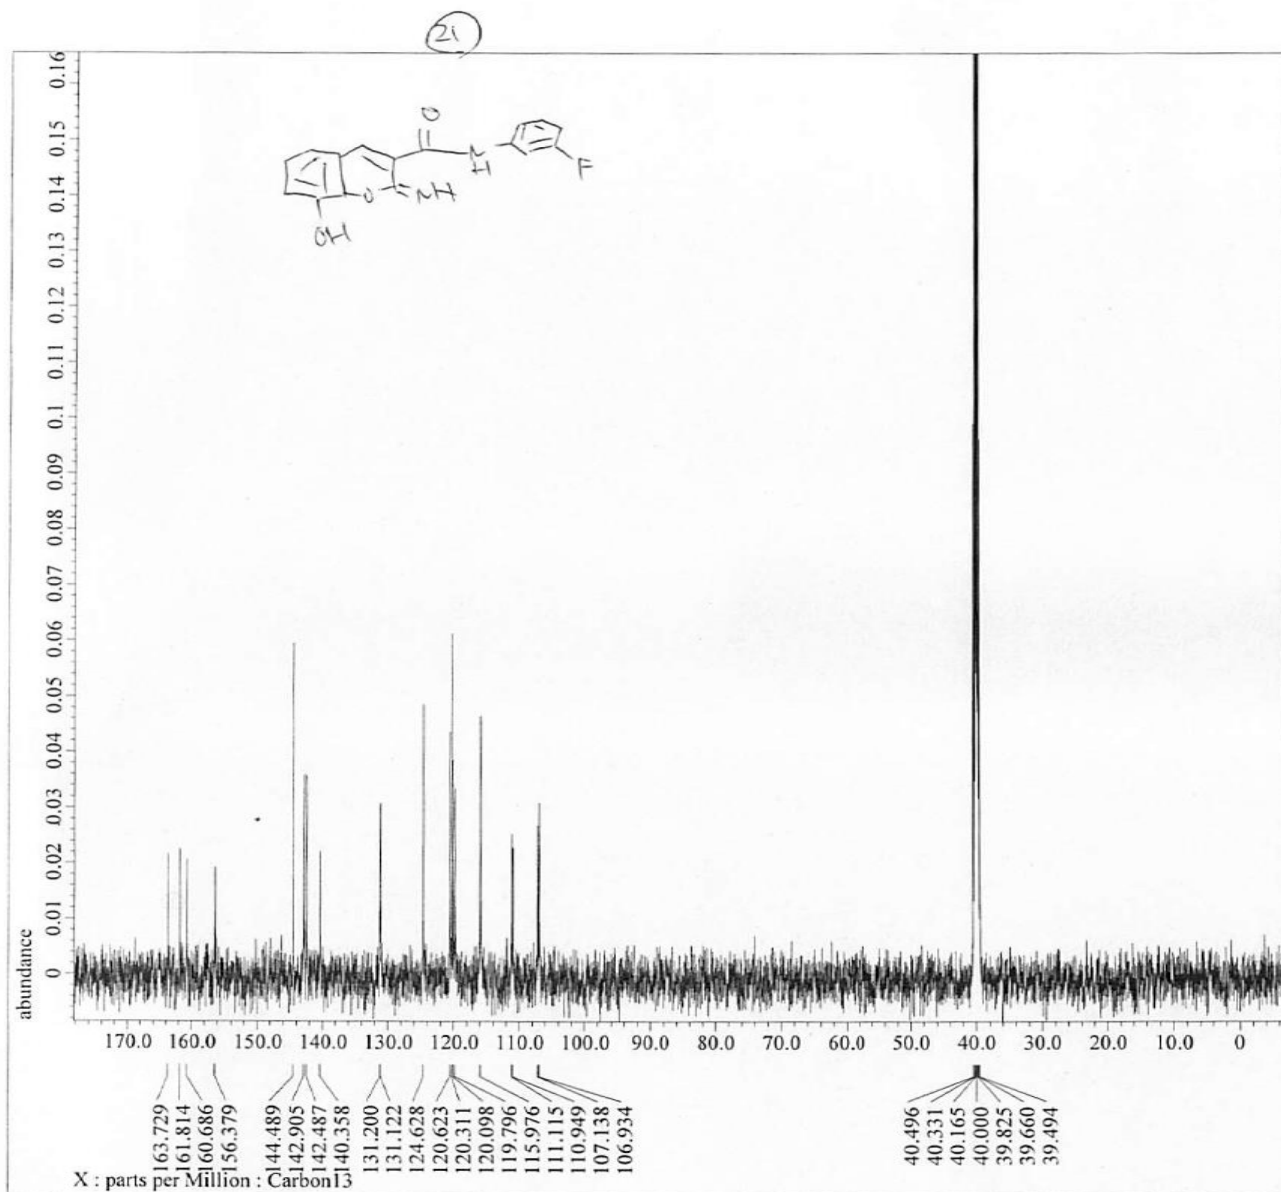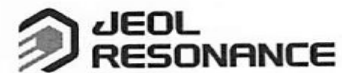

Filename = L1\_ifuku20131226-C01-1-3.j  
Author = delta  
Experiment = carbon.jxp  
Sample\_Id = L1  
Solvent = DMSO-D6  
Creation\_Time = 26-DEC-2013 11:05:05  
Revision\_Time = 26-DEC-2013 11:21:10  
Current\_Time = 26-DEC-2013 11:21:48

Data Format = 1D COMPLEX  
Dim Size = 26214  
Dim Title = Carbon13  
Dim Units = [ppm]  
Dimensions = X  
Site = JNM-ECX500  
Spectrometer = DELTA2\_NMR

Field\_Strength = 11.7473579[T] (500[MHz])  
X\_Acq\_Duration = 0.81788928[s]  
X\_Domain = 13C  
X\_Freq = 125.76529768[MHz]  
X\_Offset = 100[ppm]  
X\_Points = 32768  
X\_Prescans = 4  
X\_Resolution = 1.22265938[Hz]  
X\_Sweep = 40.06410256[kHz]  
X\_Sweep\_Clipped = 32.05128205[kHz]  
Irr\_Domain = Proton  
Irr\_Freq = 500.15991521[MHz]  
Irr\_Offset = 5.0[ppm]  
Clipped = FALSE  
Scans = 339  
Total\_Scans = 339

Relaxation\_Delay = 2[s]  
Recvr\_Gain = 46  
Temp\_Get = 21.8[dC]  
X\_90\_Width = 9[us]  
X\_Acq\_Time = 0.81788928[s]  
X\_Angle = 30[deg]  
X\_Atn = 5.7[dB]  
X\_Pulse = 3[us]  
Irr\_Atn\_Dec = 21.987[dB]  
Irr\_Atn\_Noe = 21.987[dB]  
Irr\_Noise = WALTZ  
Irr\_Pwidth = 92[us]  
Decoupling = TRUE  
Initial\_Wait = 1[s]  
Noe = TRUE  
Noe\_Time = 2[s]  
Repetition\_Time = 2.81788928[s]



13g D

P-F

CBR-1

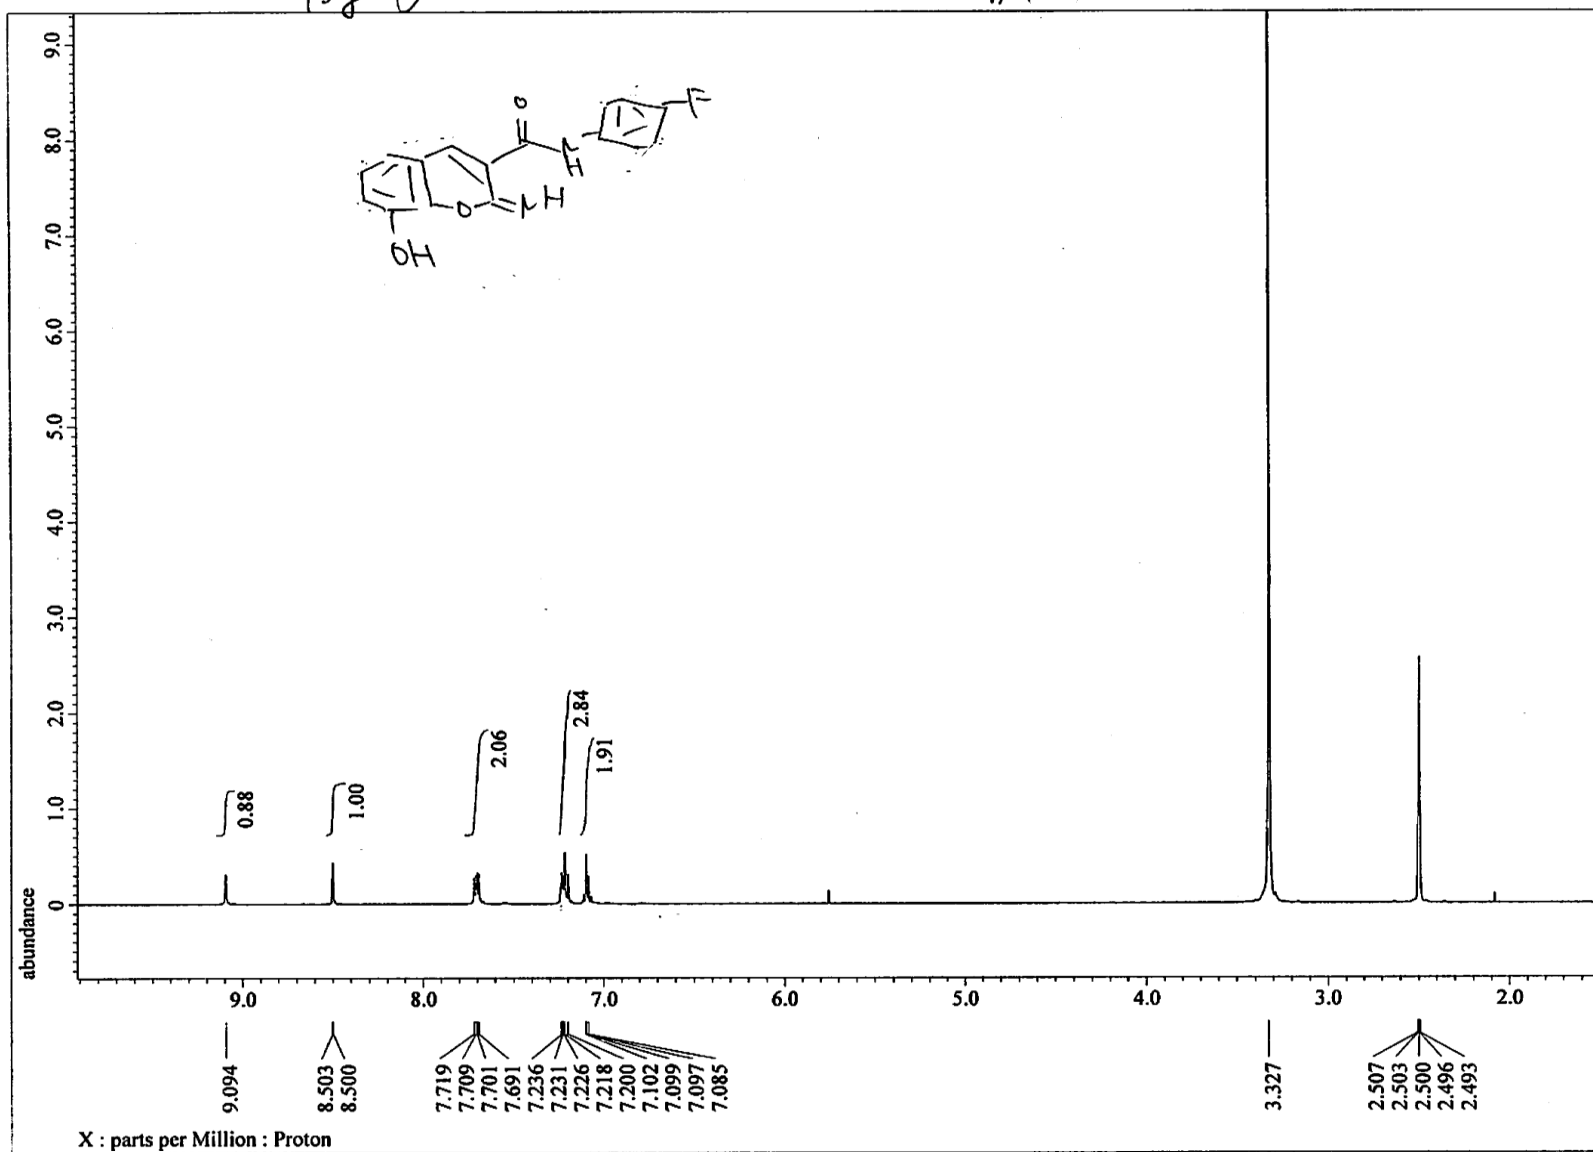

14+2

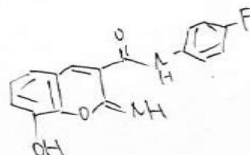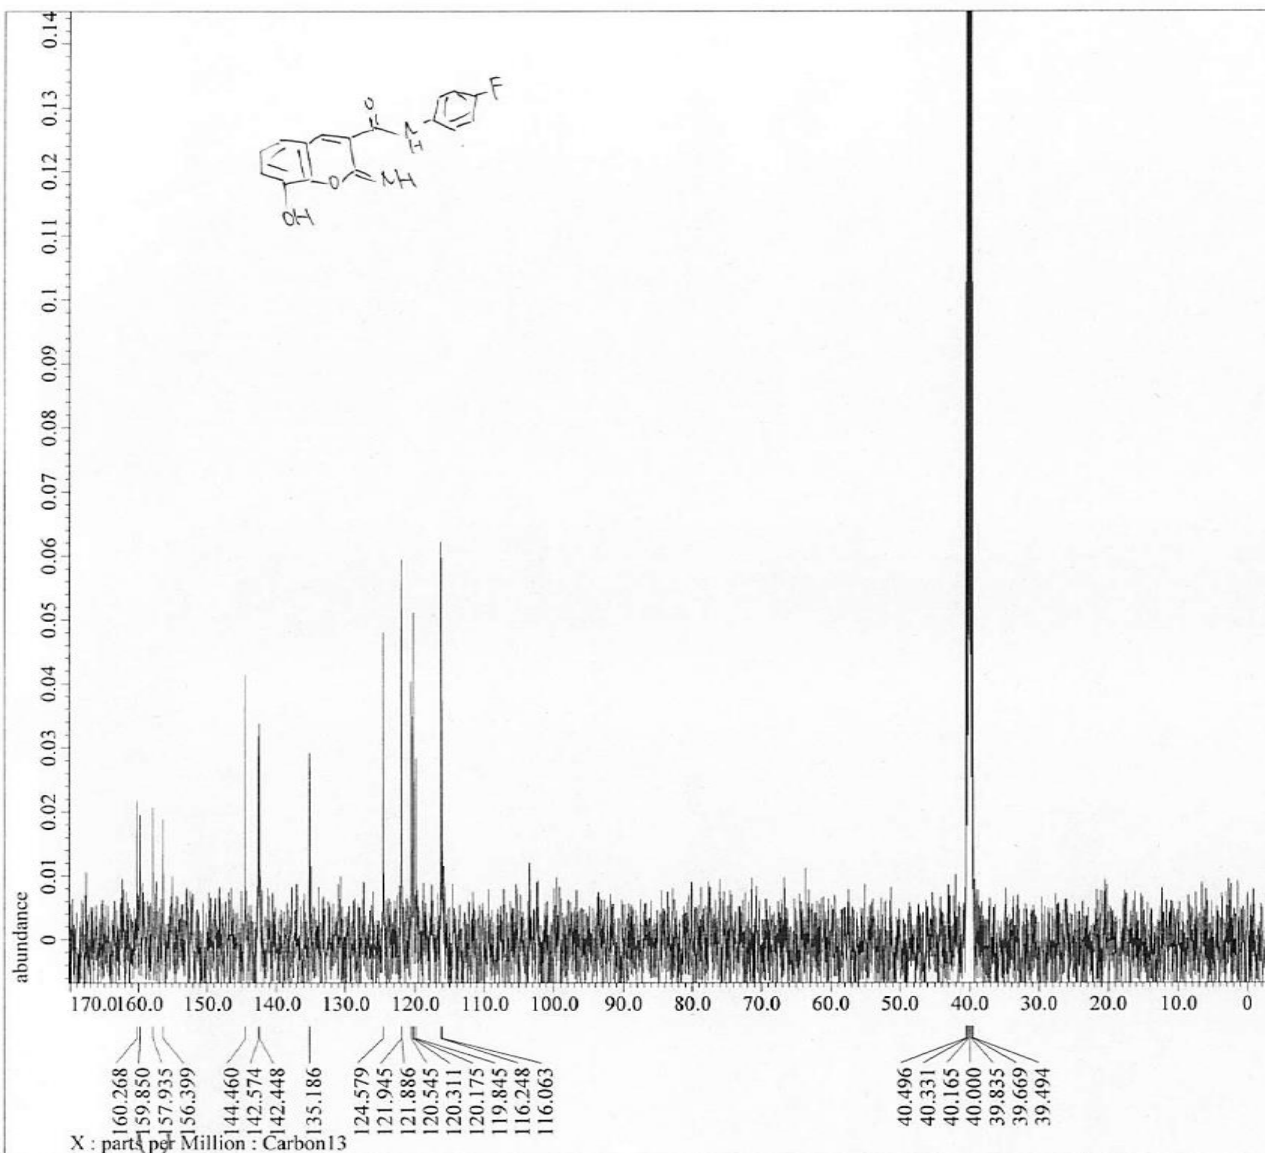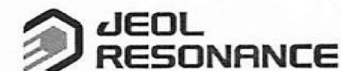

Filename = L1\_ifuku20131121-C01\_copy1  
 Author = delta  
 Experiment = carbon.jpg  
 Sample\_Id = L1  
 Solvent = DMSO-D6  
 Creation\_Time = 21-NOV-2013 14:36:16  
 Revision\_Time = 21-NOV-2013 14:45:19  
 Current\_Time = 21-NOV-2013 14:47:19

Data\_Format = 1D\_COMPLEX  
 Dim\_Size = 26214  
 Dim\_Title = Carbon13  
 Dim\_Units = [ppm]  
 Dimensions = X  
 Site = JNM-ECX500  
 Spectrometer = DELTA2\_NMR

Field\_Strength = 11.7473579[T] (500[MHz])  
 X\_Acq\_Duration = 0[s]  
 X\_Domain = 13C  
 X\_Freq = 125.76529768[MHz]  
 X\_Offset = 100[ppm]  
 X\_Points = 32768  
 X\_Prescans = 4  
 X\_Resolution = 1.22265938[Hz]  
 X\_Sweep = 40.06410256[kHz]  
 X\_Sweep\_Clipped = 32.05128205[kHz]  
 Irr\_Domain = Proton  
 Irr\_Freq = 500.15991521[MHz]  
 Irr\_Offset = 5.0[ppm]  
 Clipped = FALSE  
 Incomplete\_Copy = TRUE  
 Scans = 157  
 Total\_Scans = 157

Relaxation\_Delay = 2[s]  
 Recvr\_Gain = 46  
 Temp\_Get = 22.7[dC]  
 X\_90\_Width = 9[us]  
 X\_Acq\_Time = 0.81788928[s]  
 X\_Angle = 30[deg]  
 X\_Atn = 5.7[dB]  
 X\_Pulse = 3[us]  
 Irr\_Atn\_Dec = 21.987[dB]  
 Irr\_Atn\_Noe = 21.987[dB]  
 Irr\_Noise = WALTZ  
 Irr\_Pwidth = 92[us]  
 Decoupling = TRUE  
 Initial\_Wait = 1[s]  
 Noe = TRUE  
 Noe\_Time = 2[s]  
 Repetition\_Time = 2.81788928[s]

13h

0

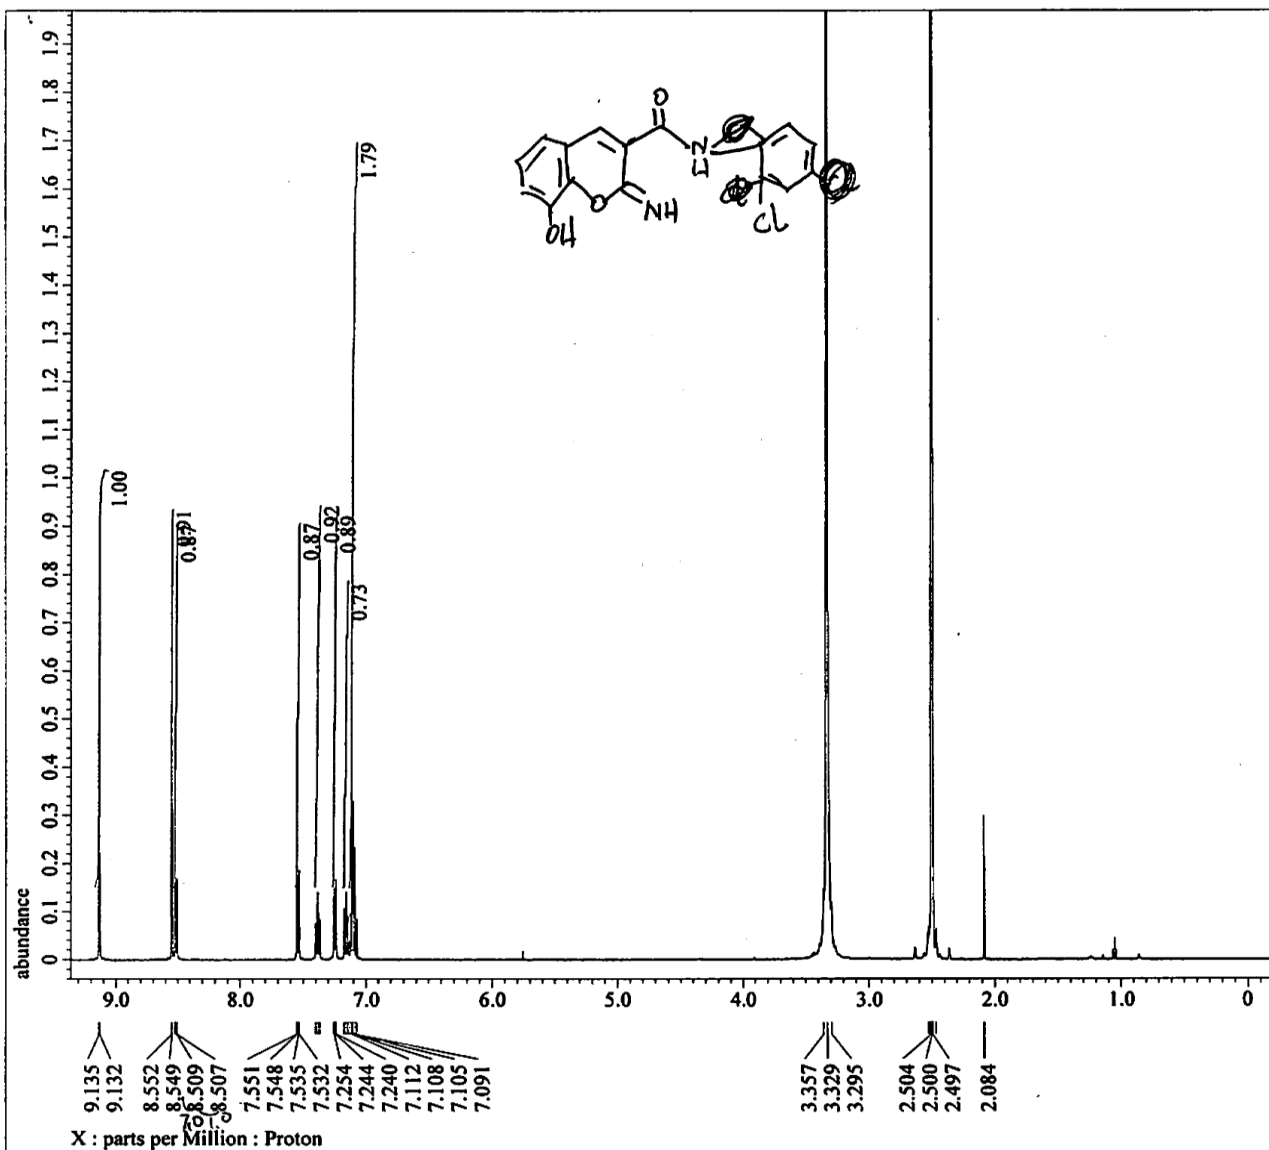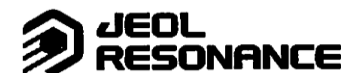

Filename = LI\_xia140314H-1-1-S.jdf  
 Author = delta  
 Experiment = proton.jxp  
 Sample Id = LI  
 Solvent = DMSO-D6  
 Creation Time = 14-MAR-2014 14:34:33  
 Revision Time = 14-MAR-2014 14:37:08  
 Current Time = 14-MAR-2014 14:37:36  
 Data Format = 1D COMPLEX  
 Dim Size = 26214  
 Dim Title = Proton  
 Dim Units = [ppm]  
 Dimensions = X  
 Site = JNM-ECS500  
 Spectrometer = DELTA2\_NMR  
 Field Strength = 11.7473579[T] (500[MHz])  
 X Acq Duration = 3.49175808[s]  
 X Domain = 1H  
 X Freq = 500.15991521[MHz]  
 X Offset = 5.0[ppm]  
 X Points = 32768  
 X Prescans = 1  
 X Resolution = 0.28638868[Hz]  
 X Sweep = 9.38438438[kHz]  
 X Sweep Clipped = 7.50750751[kHz]  
 Irr Domain = Proton  
 Irr Freq = 500.15991521[MHz]  
 Irr Offset = 5.0[ppm]  
 Tri Domain = Proton  
 Tri Freq = 500.15991521[MHz]  
 Tri Offset = 5.0[ppm]  
 Clipped = FALSE  
 Scans = 8  
 Total Scans = 8  
 Relaxation Delay = 5[s]  
 Recvr Gain = 48  
 Temp Get = 22.6[degC]  
 X 90 Width = 11.6[us]  
 X Acq Time = 3.49175808[s]  
 X Angle = 45[deg]  
 X Atn = 4[db]  
 X Pulse = 5.8[us]  
 Irr Mode = OFF  
 Tri Mode = OFF  
 Dante Presat = FALSE  
 Initial Wait = 1[s]  
 Repetition Time = 8.49175808[s]

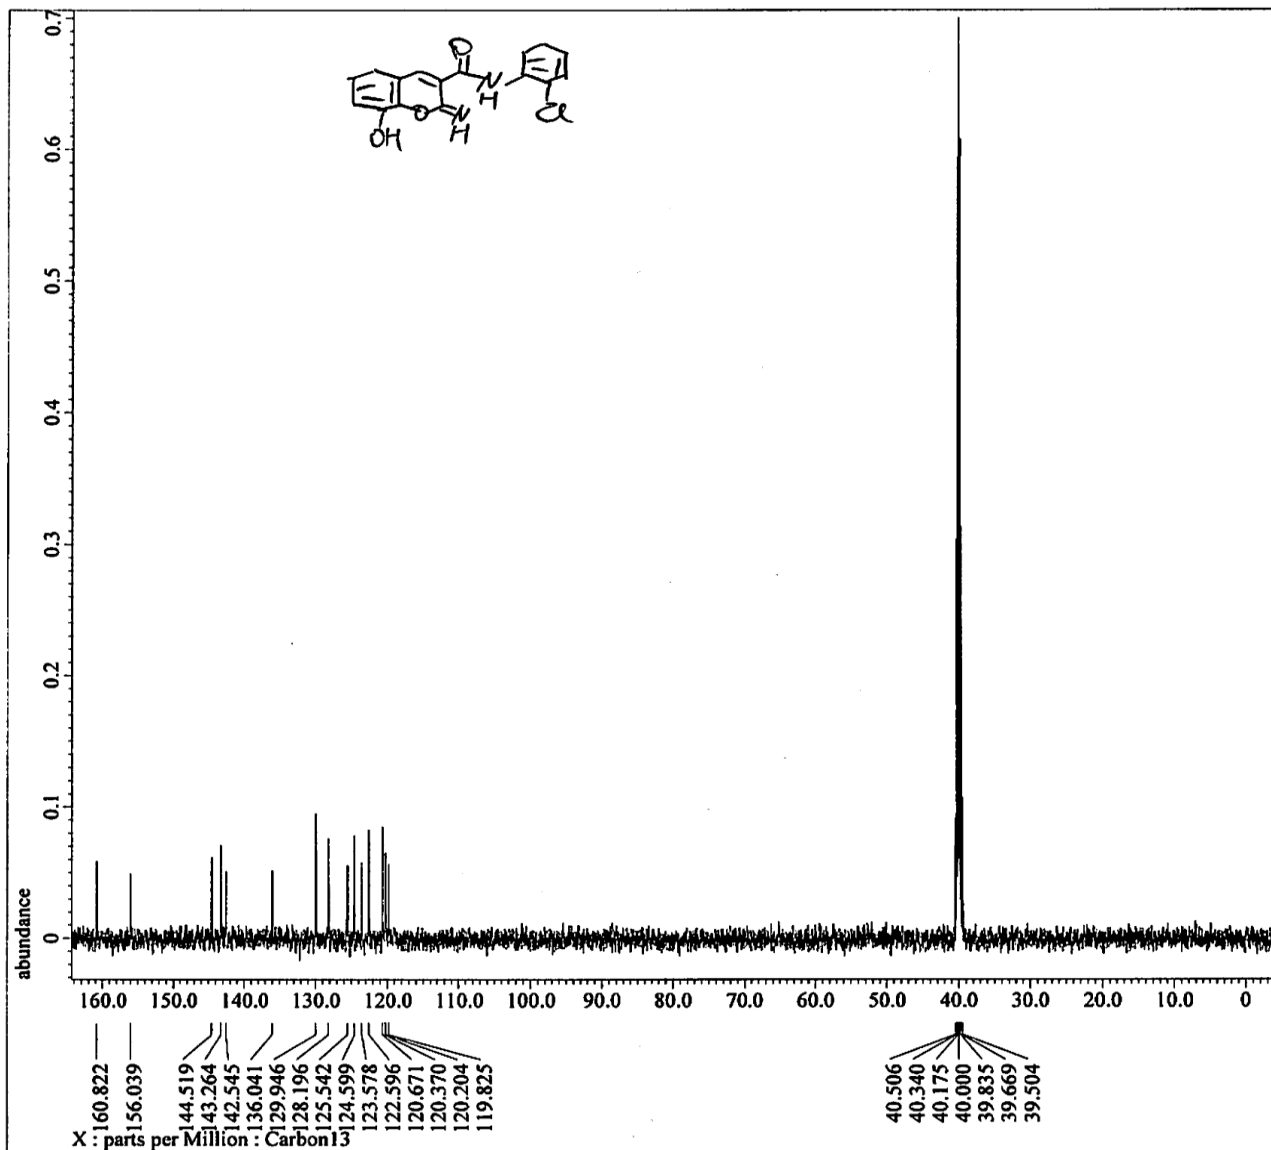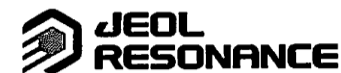

Filename = L1\_hul40407C-1-1-3.jdf  
Author = delta  
Experiment = carbon.jsp  
Sample Id = L1  
Solvent = DMSO-D6  
Creation Time = 7-APR-2014 10:40:56  
Revision Time = 7-APR-2014 10:46:52  
Current Time = 7-APR-2014 10:47:09

Data Format = 1D COMPLEX  
Dim Size = 26214  
Dim Title = Carbon13  
Dim Units = [ppm]  
Dimensions = X  
Site = JNM-ECS500  
Spectrometer = DELTA2\_NMR

Field Strength = 11.7473579[T] (500[MHz])  
X\_Acq\_Duration = 0.81788928[s]  
X\_Domain = 13C  
X\_Freq = 125.76529768[MHz]  
X\_Offset = 100[ppm]  
X\_Points = 32768  
X\_Programs = 4  
X\_Resolution = 1.22265938[Hz]  
X\_Sweep = 40.06410256[kHz]  
X\_Sweep\_Clipped = 32.05128205[kHz]  
Irr\_Domain = Proton  
Irr\_Freq = 500.15991521[MHz]  
Irr\_Offset = 5.0[ppm]  
Clipped = FALSE  
Scans = 124  
Total Scans = 124

Relaxation\_Delay = 2[s]  
Recvr\_Gain = 46  
Temp\_Got = 20.8[deg]  
X\_90\_Width = 9[us]  
X\_Acq\_Time = 0.81788928[s]  
X\_Angle = 30[deg]  
X\_Atn = 5.7[dB]  
X\_Pulse = 3[us]  
Irr\_Atn\_Doc = 21.987[dB]  
Irr\_Atn\_Noc = 21.987[dB]  
Irr\_Noise = WALTZ  
Irr\_Pwidth = 92[us]  
Decoupling = TRUE  
Initial\_Wait = 1[s]  
Noc = TRUE  
Noc\_Time = 2[s]  
Repetition\_Time = 2.81788928[s]

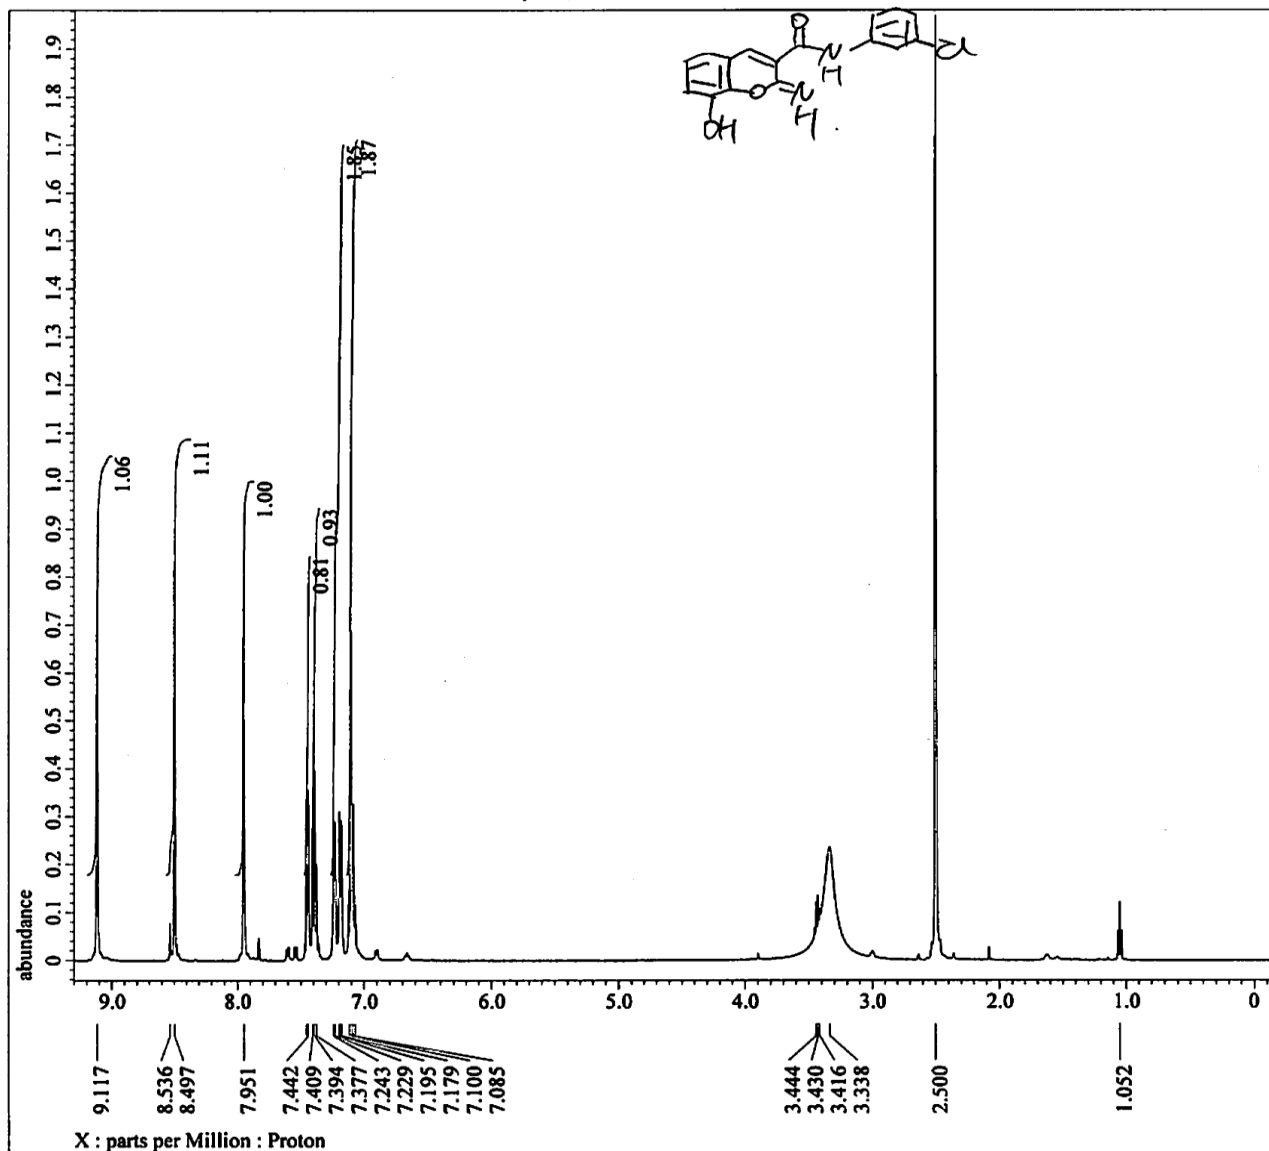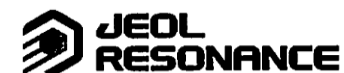

Filename = LI\_hu140212H-1-1-7.jdf  
 Author = delta  
 Experiment = proton.jpg  
 Sample Id = LI  
 Solvent = DMSO-D6  
 Creation Time = 12-FEB-2014 09:47:52  
 Revision Time = 12-FEB-2014 09:50:35  
 Current Time = 12-FEB-2014 09:50:59

Data Format = 1D COMPLEX  
 Dim Size = 26214  
 Dim Title = Proton  
 Dim Units = [ppm]  
 Dimensions = X  
 Site = JNM-ECK500  
 Spectrometer = DELTA2\_NMR

Field Strength = 11.7473579[T] (500[MHz])  
 X Acq Duration = 3.49175808[s]  
 X Domain = 1H  
 X Freq = 500.15991521[MHz]  
 X Offset = 5.0[ppm]  
 X Points = 32768  
 X Prescans = 1  
 X Resolution = 0.28638868[Hz]  
 X Sweep = 9.38438438[kHz]  
 X Sweep Clipped = 7.50750751[kHz]  
 Irr Domain = Proton  
 Irr Freq = 500.15991521[MHz]  
 Irr Offset = 5.0[ppm]  
 Tri Domain = Proton  
 Tri Freq = 500.15991521[MHz]  
 Tri Offset = 5.0[ppm]  
 Clipped = FALSE  
 Scans = 8  
 Total Scans = 8

Relaxation Delay = 5[s]  
 Recvr Gain = 44  
 Temp Get = 21.4[dC]  
 X 90 Width = 11.6[us]  
 X Acq Time = 3.49175808[s]  
 X Angle = 45[deg]  
 X Atn = 4[dB]  
 X Pulse = 5.8[us]  
 Irr Mode = Off  
 Tri Mode = Off  
 Danto Presat = FALSE  
 Initial Wait = 1[s]  
 Repetition Time = 8.49175808[s]

H<sub>13</sub>

O

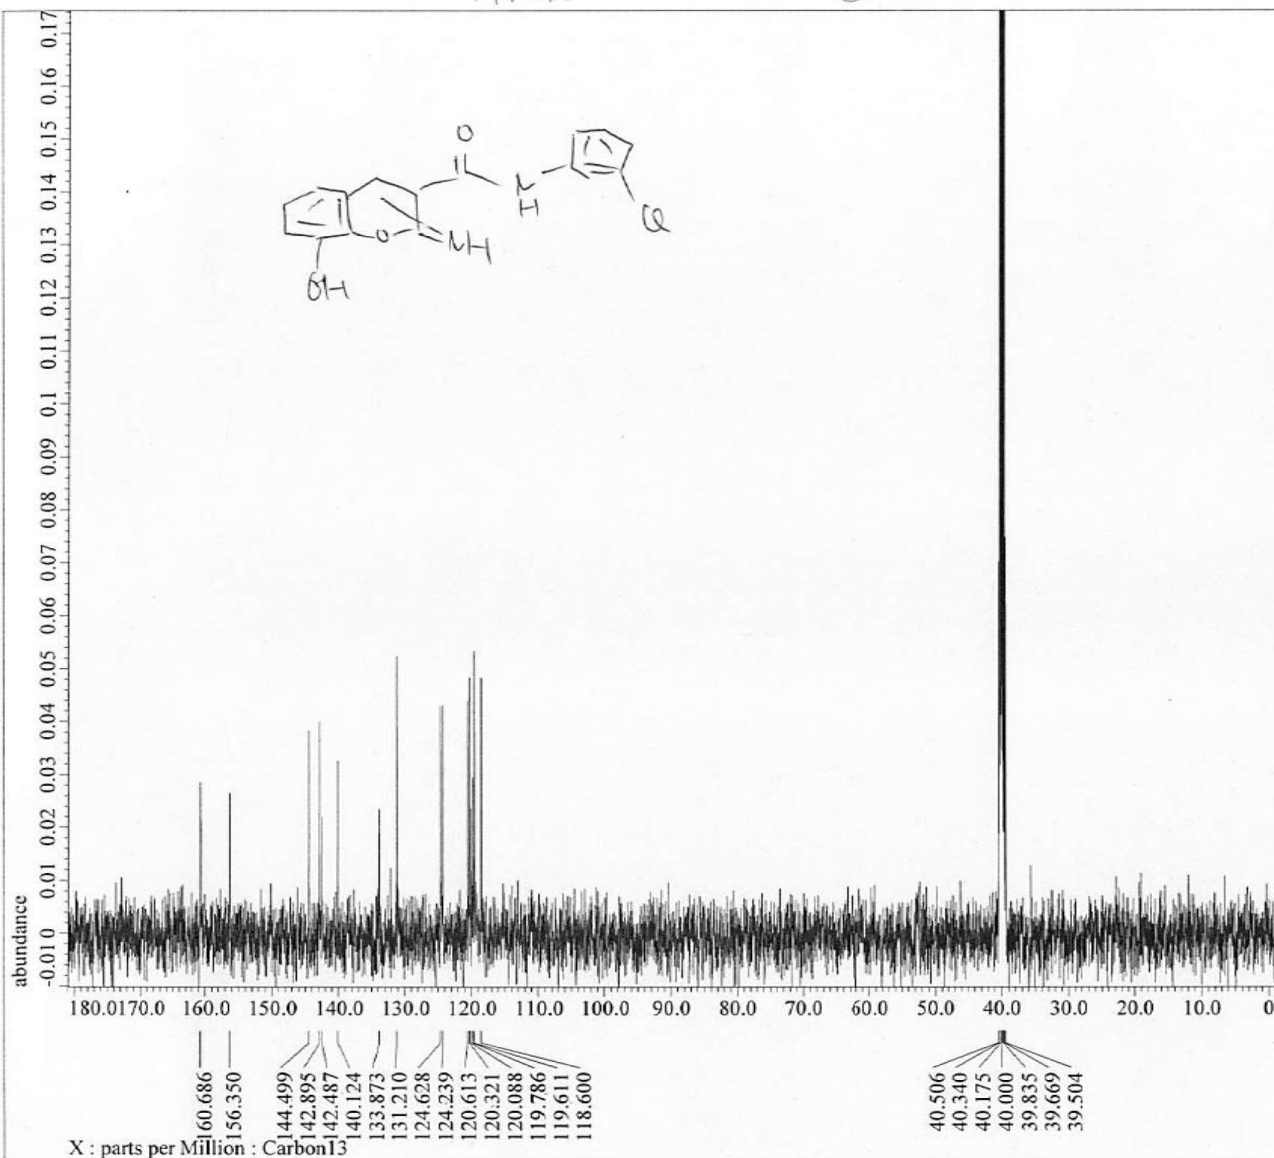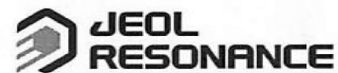

Filename = L1\_ifuku20140131-C01-1-3.j  
 Author = delta  
 Experiment = carbon.jxp  
 Sample Id = L1  
 Solvent = DMSO-D6  
 Creation Time = 31-JAN-2014 16:35:05  
 Revision Time = 31-JAN-2014 16:40:11  
 Current Time = 31-JAN-2014 16:40:32

Comment = p.67-Fr.5  
 Data Format = 1D COMPLEX  
 Dim Size = 26214  
 Dim Title = Carbon13  
 Dim Units = [ppm]  
 Dimensions = X  
 Site = JNM-ECX500  
 Spectrometer = DELTA2\_NMR  
 Field Strength = 11.7473579[T] (500[MHz])  
 X\_Acq\_Duration = 0.81788928[s]  
 X\_Domain = 13C  
 X\_Freq = 125.76529768[MHz]  
 X\_Offset = 100[ppm]  
 X\_Points = 32768  
 X\_Prescans = 4  
 X\_Resolution = 1.22265938[Hz]  
 X\_Sweep = 40.06410256[kHz]  
 X\_Sweep\_Clipped = 32.05128205[kHz]  
 Irr\_Domain = Proton  
 Irr\_Freq = 500.15991521[MHz]  
 Irr\_Offset = 5.0[ppm]  
 Clipped = FALSE  
 Scans = 160  
 Total\_Scans = 160

Relaxation\_Delay = 1[s]  
 Recvr Gain = 46  
 Temp\_Get = 22.7[dC]  
 X\_90\_Width = 9[us]  
 X\_Acq\_Time = 0.81788928[s]  
 X\_Angle = 30[deg]  
 X\_Atn = 5.7[dB]  
 X\_Pulse = 3[us]  
 Irr\_Atn\_Dec = 21.987[dB]  
 Irr\_Atn\_Noe = 21.987[dB]  
 Irr\_Noise = WALTZ  
 Irr\_Pwidth = 92[us]  
 Decoupling = TRUE  
 Initial\_Wait = 1[s]  
 Noe = TRUE  
 Noe\_Time = 1[s]  
 Repetition\_Time = 1.81788928[s]

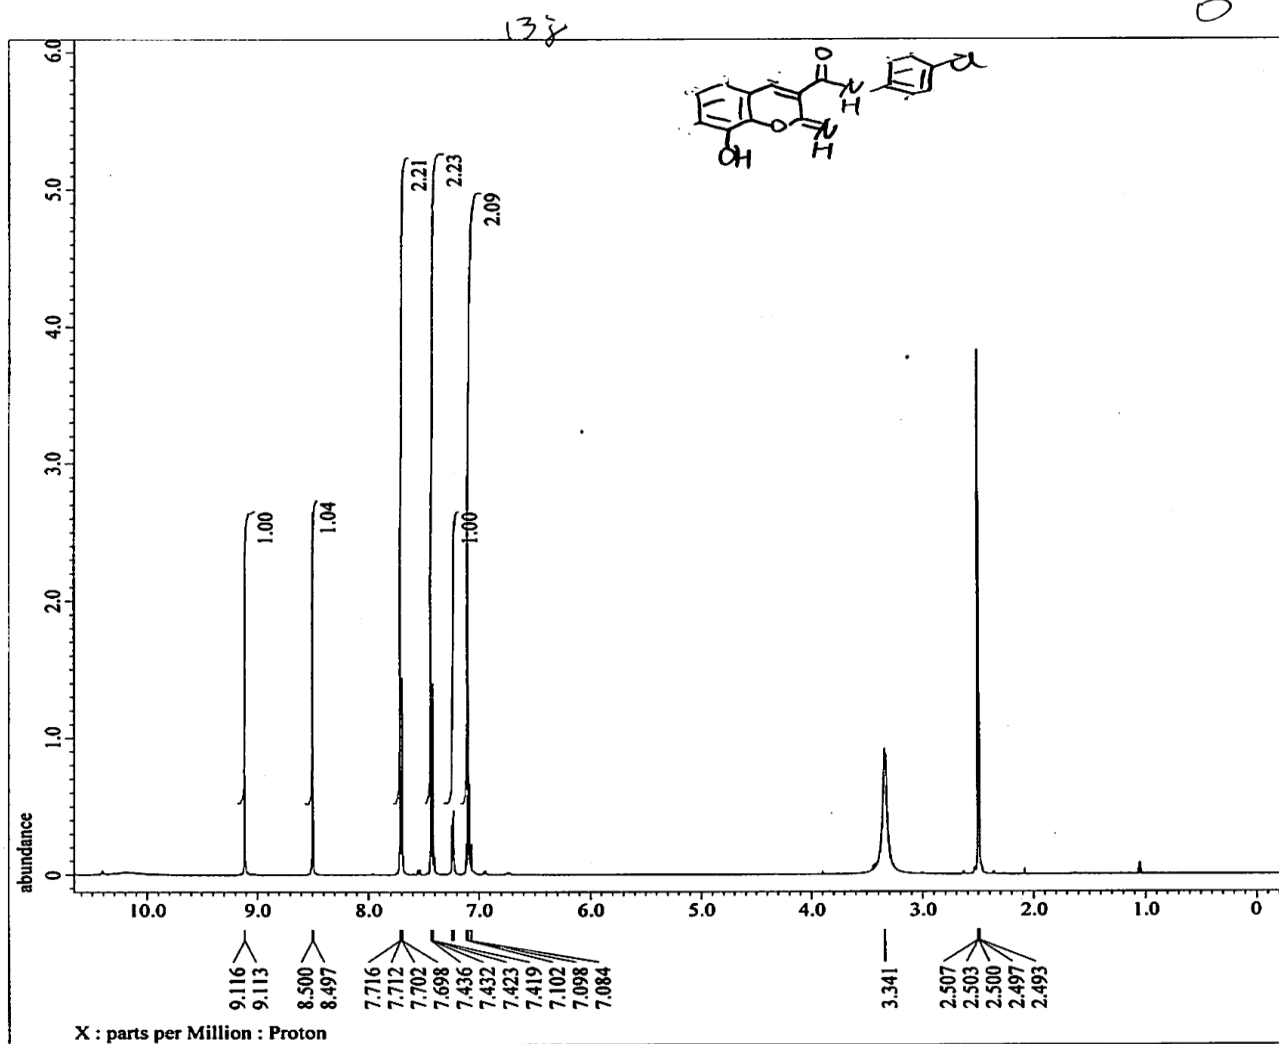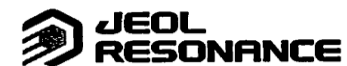

Filename = LI\_hul40310H-3-1-5.jdf  
 Author = delta  
 Experiment = proton.jpg  
 Sample Id = LI  
 Solvent = DMSO-D6  
 Creation Time = 10-MAR-2014 12:54:32  
 Revision Time = 10-MAR-2014 12:56:25  
 Current Time = 10-MAR-2014 12:56:50

Data Format = 1D COMPLEX  
 Dim Size = 26214  
 Dim Title = Proton  
 Dim Units = [ppm]  
 Dimensions = X  
 Site = JNM-ECX500  
 Spectrometer = DELTA2\_NMR

Field Strength = 11.7473579[T] (500[MHz])  
 X\_Acq\_Duration = 3.49175808[s]  
 X\_Domain = 1H  
 X\_Freq = 500.15991521[MHz]  
 X\_Offset = 5.0[ppm]  
 X\_Points = 32768  
 X\_Prescans = 1  
 X\_Resolution = 0.28638868[Hz]  
 X\_Sweep = 9.38438438[kHz]  
 X\_Sweep\_Clipped = 7.50750751[kHz]  
 Irr\_Domain = Proton  
 Irr\_Freq = 500.15991521[MHz]  
 Irr\_Offset = 5.0[ppm]  
 Tri\_Domain = Proton  
 Tri\_Freq = 500.15991521[MHz]  
 Tri\_Offset = 5.0[ppm]  
 Clipped = FALSE  
 Scans = 8  
 Total\_Scans = 8

Relaxation\_Delay = 5[s]  
 Recvr\_Gain = 48  
 Temp\_Got = 21.1[dC]  
 X\_90\_Width = 11.6[us]  
 X\_Acq\_Time = 3.49175808[s]  
 X\_Angle = 45[deg]  
 X\_Atn = 4[dB]  
 X\_Pulse = 5.8[us]  
 Irr\_Mode = Off  
 Tri\_Mode = Off  
 Datto\_Presat = FALSE  
 Initial\_Wait = 1[s]  
 Repetition\_Time = 8.49175808[s]

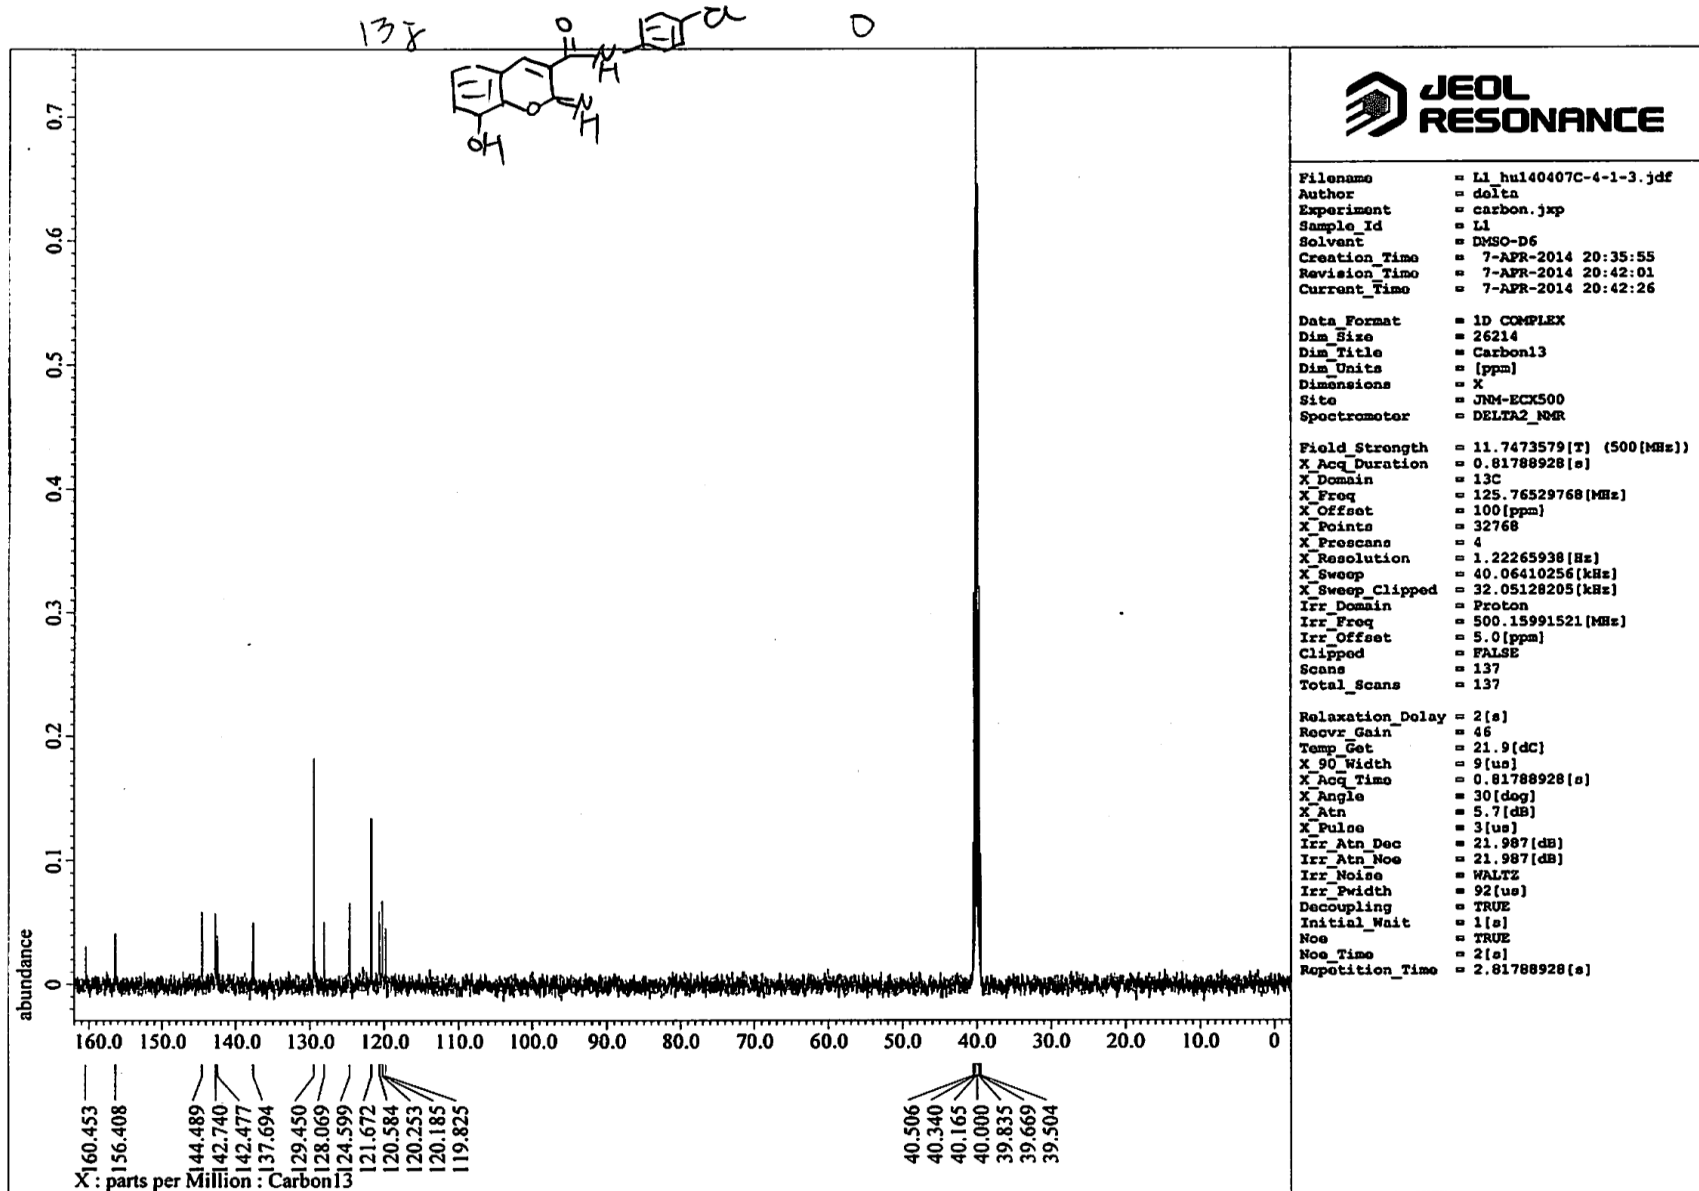



13k

①

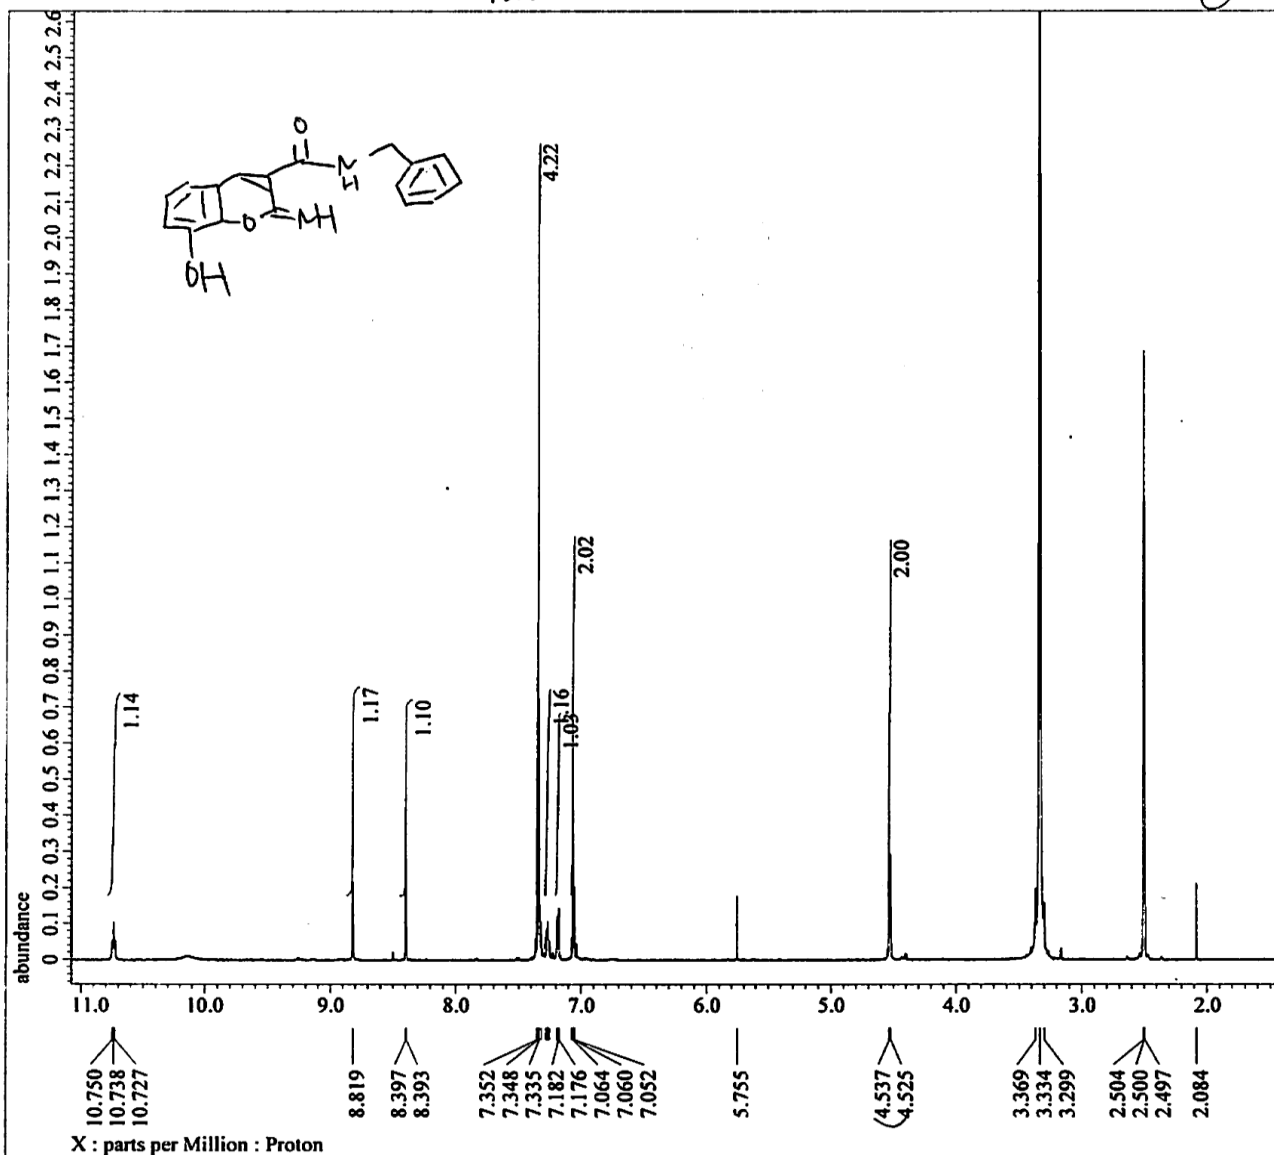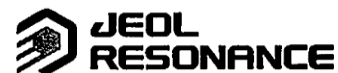

Filename = LI ifuku20131213-R02-1-4.j  
 Author = delta  
 Experiment = proton.jpg  
 Sample Id = LI  
 Solvent = DMSO-D6  
 Creation Time = 13-DEC-2013 14:50:02  
 Revision Time = 13-DEC-2013 14:56:44  
 Current Time = 13-DEC-2013 14:56:58

Data Format = 1D COMPLEX  
 Dim Size = 26214  
 Dim Title = Proton  
 Dim Units = [ppm]  
 Dimensions = X  
 Site = JNM-ECK500  
 Spectrometer = DELTA2 NMR

Field Strength = 11.7473579[T] (500[MHz])  
 X Acq Duration = 3.49175808[s]  
 X Domain = 18  
 X Freq = 500.15991521[MHz]  
 X Offset = 5.0[ppm]  
 X Points = 32768  
 X Prescans = 1  
 X Resolution = 0.28638868[Hz]  
 X Sweep = 9.38438438[kHz]  
 X Sweep Clipped = 7.50750751[kHz]  
 Irr Domain = Proton  
 Irr Freq = 500.15991521[MHz]  
 Irr Offset = 5.0[ppm]  
 Tri Domain = Proton  
 Tri Freq = 500.15991521[MHz]  
 Tri Offset = 5.0[ppm]  
 Clipped = FALSE  
 Scans = 4  
 Total Scans = 4

Relaxation Delay = 5[s]  
 Recvr Gain = 50  
 Temp Get = 22.2[dC]  
 X 90 Width = 11.6[us]  
 X Acq Time = 3.49175808[s]  
 X Angle = 45[deg]  
 X Atn = 4[dB]  
 X Pulse = 5.8[us]  
 Irr Mode = Off  
 Tri Mode = Off  
 Dante Presat = FALSE  
 Initial Wait = 1[s]  
 Repetition Time = 8.49175808[s]

14k 13k

6

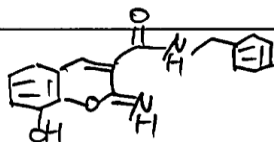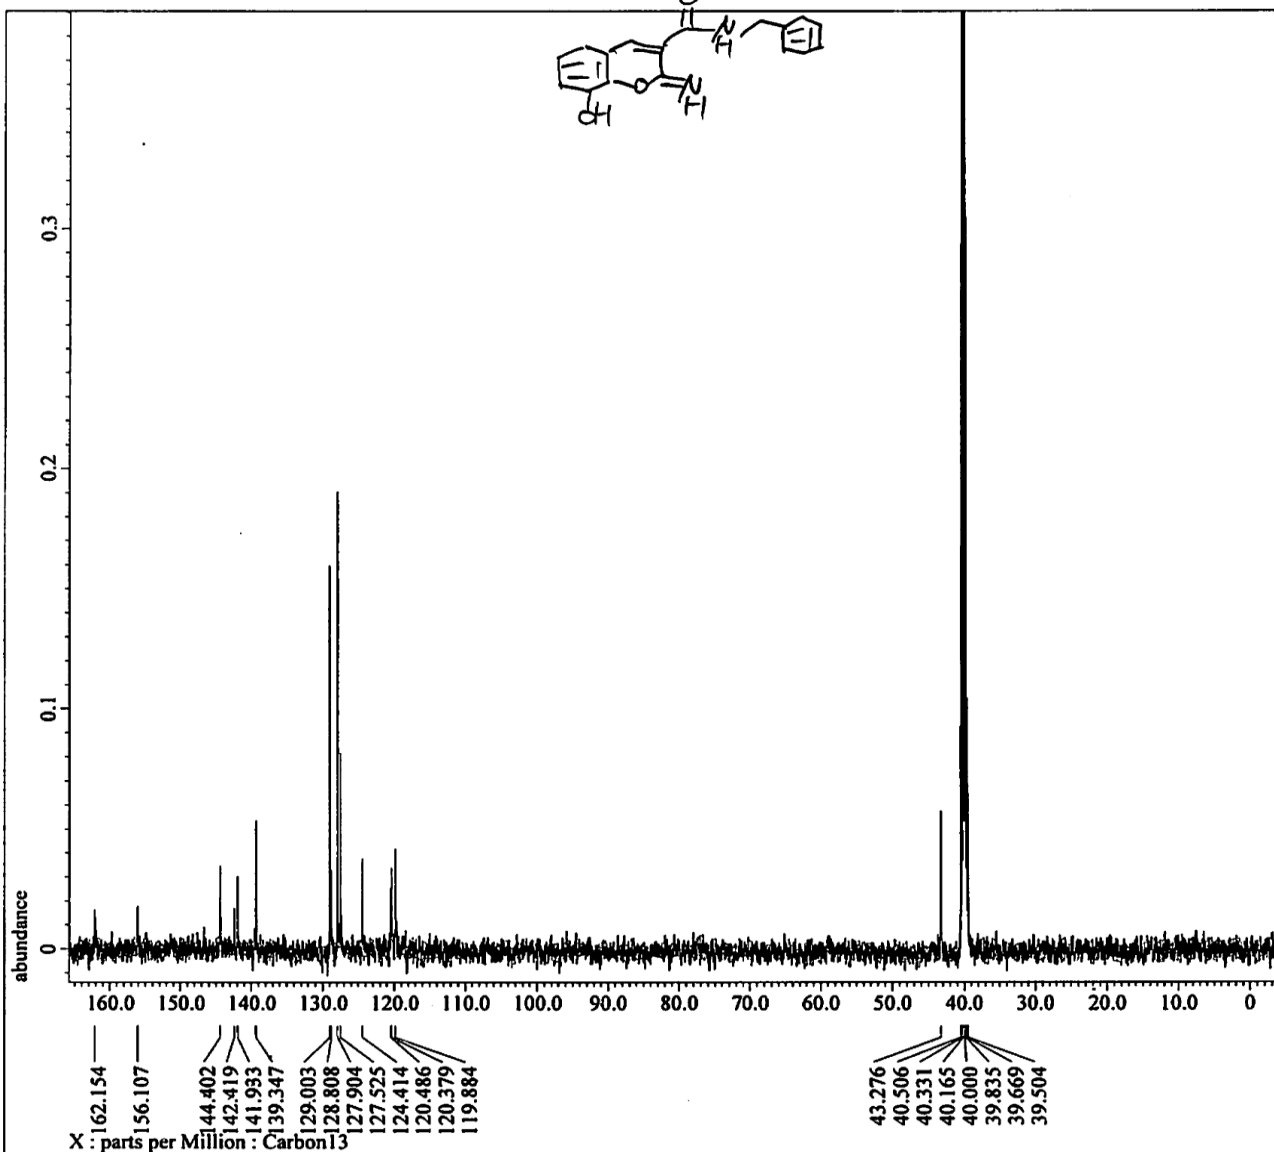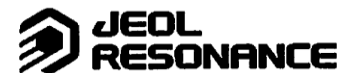

Filename = LI\_hul4210C-1-1-3.jdf  
 Author = delta  
 Experiment = carbon.jpg  
 Sample Id = LI  
 Solvent = DMSO-D6  
 Creation Time = 10-FEB-2014 11:06:49  
 Revision Time = 10-FEB-2014 11:22:00  
 Current Time = 10-FEB-2014 11:23:00  
 Data Format = 1D COMPLEX  
 Dim Size = 26214  
 Dim Title = Carbon13  
 Dim Units = [ppm]  
 Dimensions = X  
 Site = JNM-ECX500  
 Spectrometer = DELTA2 NMR  
 Field Strength = 11.7473579[T] (500[MHz])  
 X Acq Duration = 0.81788928[s]  
 X Domain = 13C  
 X Freq = 125.76529768[MHz]  
 X Offset = 100[ppm]  
 X Points = 32768  
 X Prescans = 4  
 X Resolution = 1.22265938[Hz]  
 X Sweep = 40.06410256[kHz]  
 X Sweep Clipped = 32.05128205[kHz]  
 Irr Domain = Proton  
 Irr Freq = 500.15991521[MHz]  
 Irr Offset = 5.0[ppm]  
 Clipped = FALSE  
 Scans = 322  
 Total Scans = 322  
 Relaxation Delay = 2[s]  
 Recvr Gain = 46  
 Temp Get = 21.2[dc]  
 X 90 Width = 9[us]  
 X Acq Time = 0.81788928[s]  
 X Angle = 30[deg]  
 X Atn = 5.7[dB]  
 X Pulse = 3[us]  
 Irr Atn Dec = 21.987[dB]  
 Irr Atn Noe = 21.987[dB]  
 Irr Noise = WALTZ  
 Irr Pwidth = 92[us]  
 Decoupling = TRUE  
 Initial Wait = 1[s]  
 Noe = TRUE  
 Noe Time = 2[s]  
 Repetition Time = 2.81788928[s]

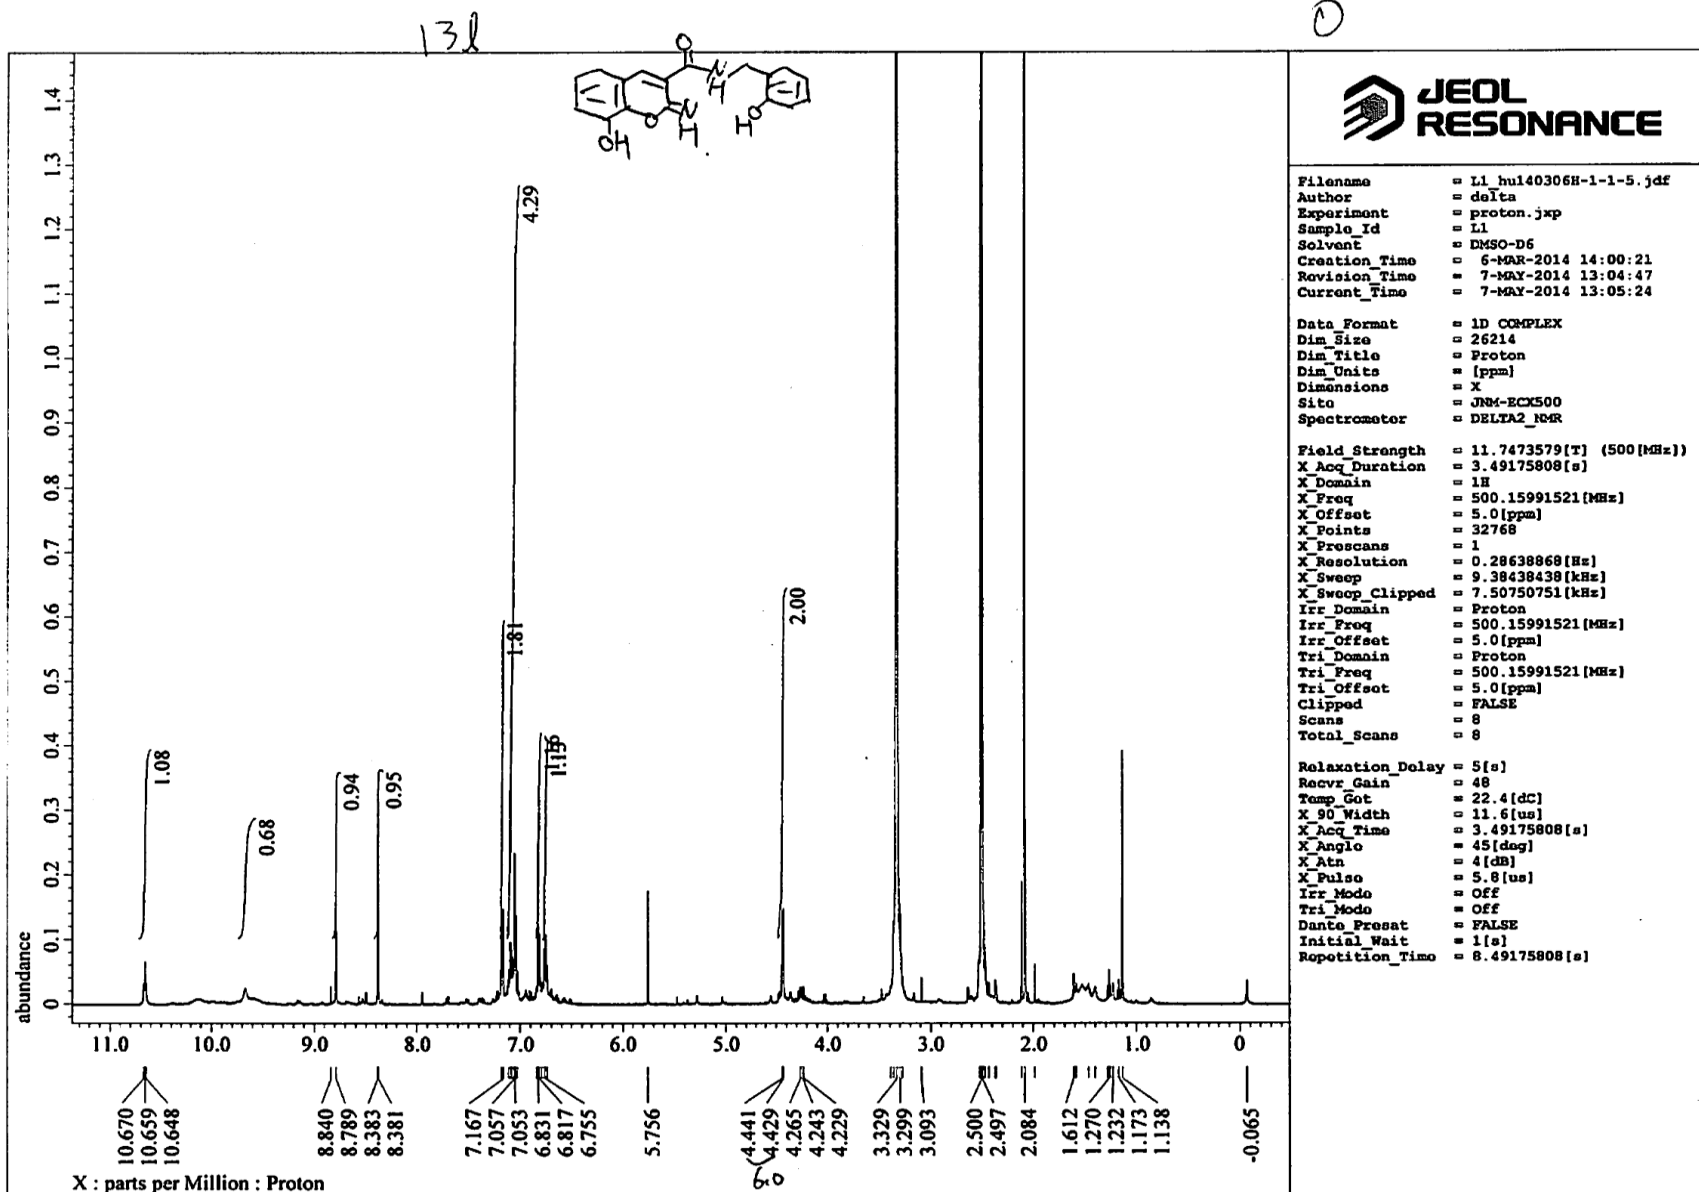

132

D

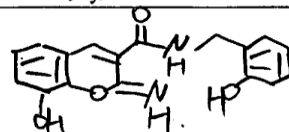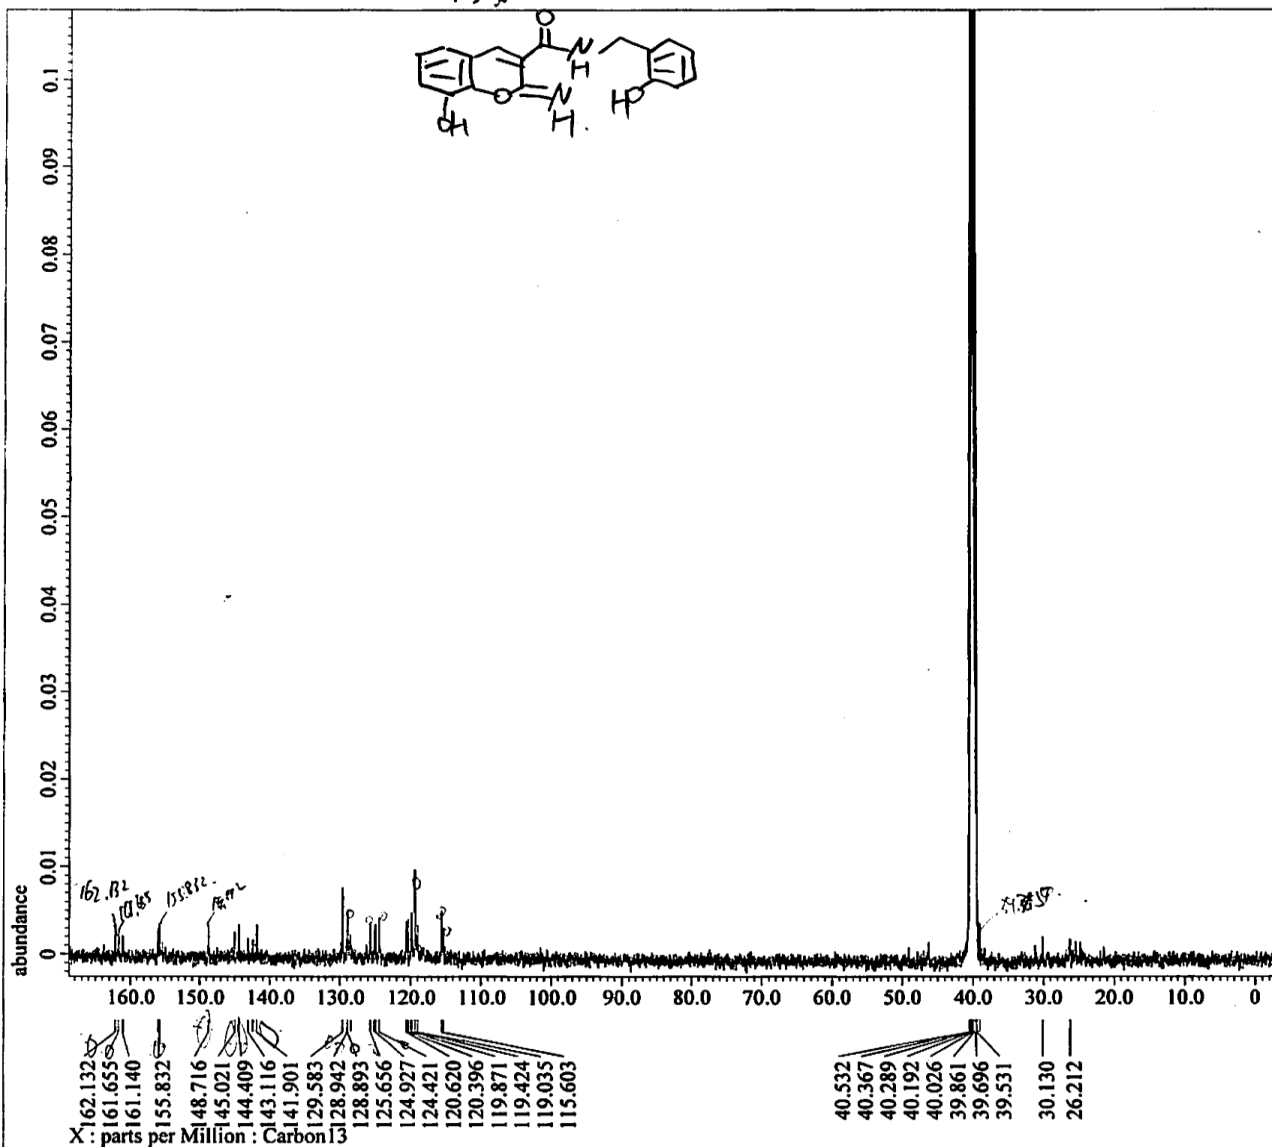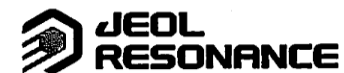

Filename = LI\_hu140416C-1-1-3.jdf  
 Author = delta  
 Experiment = carbon.jpg  
 Sample Id = LI  
 Solvent = DMSO-D6  
 Creation Time = 16-APR-2014 22:44:45  
 Revision Time = 17-APR-2014 08:31:31  
 Current Time = 17-APR-2014 08:32:55

Data Format = 1D COMPLEX  
 Dim Size = 26214  
 Dim Title = Carbon13  
 Dim Units = [ppm]  
 Dimensions = X  
 Site = JNM-ECK500  
 Spectrometer = DELTA2\_NMR

Field Strength = 11.7473579[T] (500[MHz])  
 X Acq\_Duration = 0.81788928[s]  
 X Domain = 13C  
 X Freq = 125.76529768[MHz]  
 X Offset = 100[ppm]  
 X Points = 32768  
 X Prescans = 4  
 X Resolution = 1.22265938[Hz]  
 X Sloop = 40.06410256[kHz]  
 X Sweep\_Clippped = 32.05128205[kHz]  
 Irr\_Domain = Proton  
 Irr\_Freq = 500.15991521[MHz]  
 Irr\_Offset = 5.0[ppm]  
 Clipped = TRUE  
 Scans = 12497  
 Total\_Scans = 12497

Relaxation\_Delay = 2[s]  
 Recvr\_Gain = 46  
 Temp\_Got = 22.3[deg]  
 X 90\_Width = 9[us]  
 X Acq\_Time = 0.81788928[s]  
 X Angle = 30[deg]  
 X Atn = 5.7[dB]  
 X Pulse = 3[us]  
 Irr\_Atn\_Dec = 21.987[dB]  
 Irr\_Atn\_Noe = 21.987[dB]  
 Irr\_Noise = WALTZ  
 Irr\_Pwidth = 92[us]  
 Decoupling = TRUE  
 Initial\_Wait = 1[s]  
 Noo = TRUE  
 Noo\_Time = 2[s]  
 Repetition\_Time = 2.81788928[s]

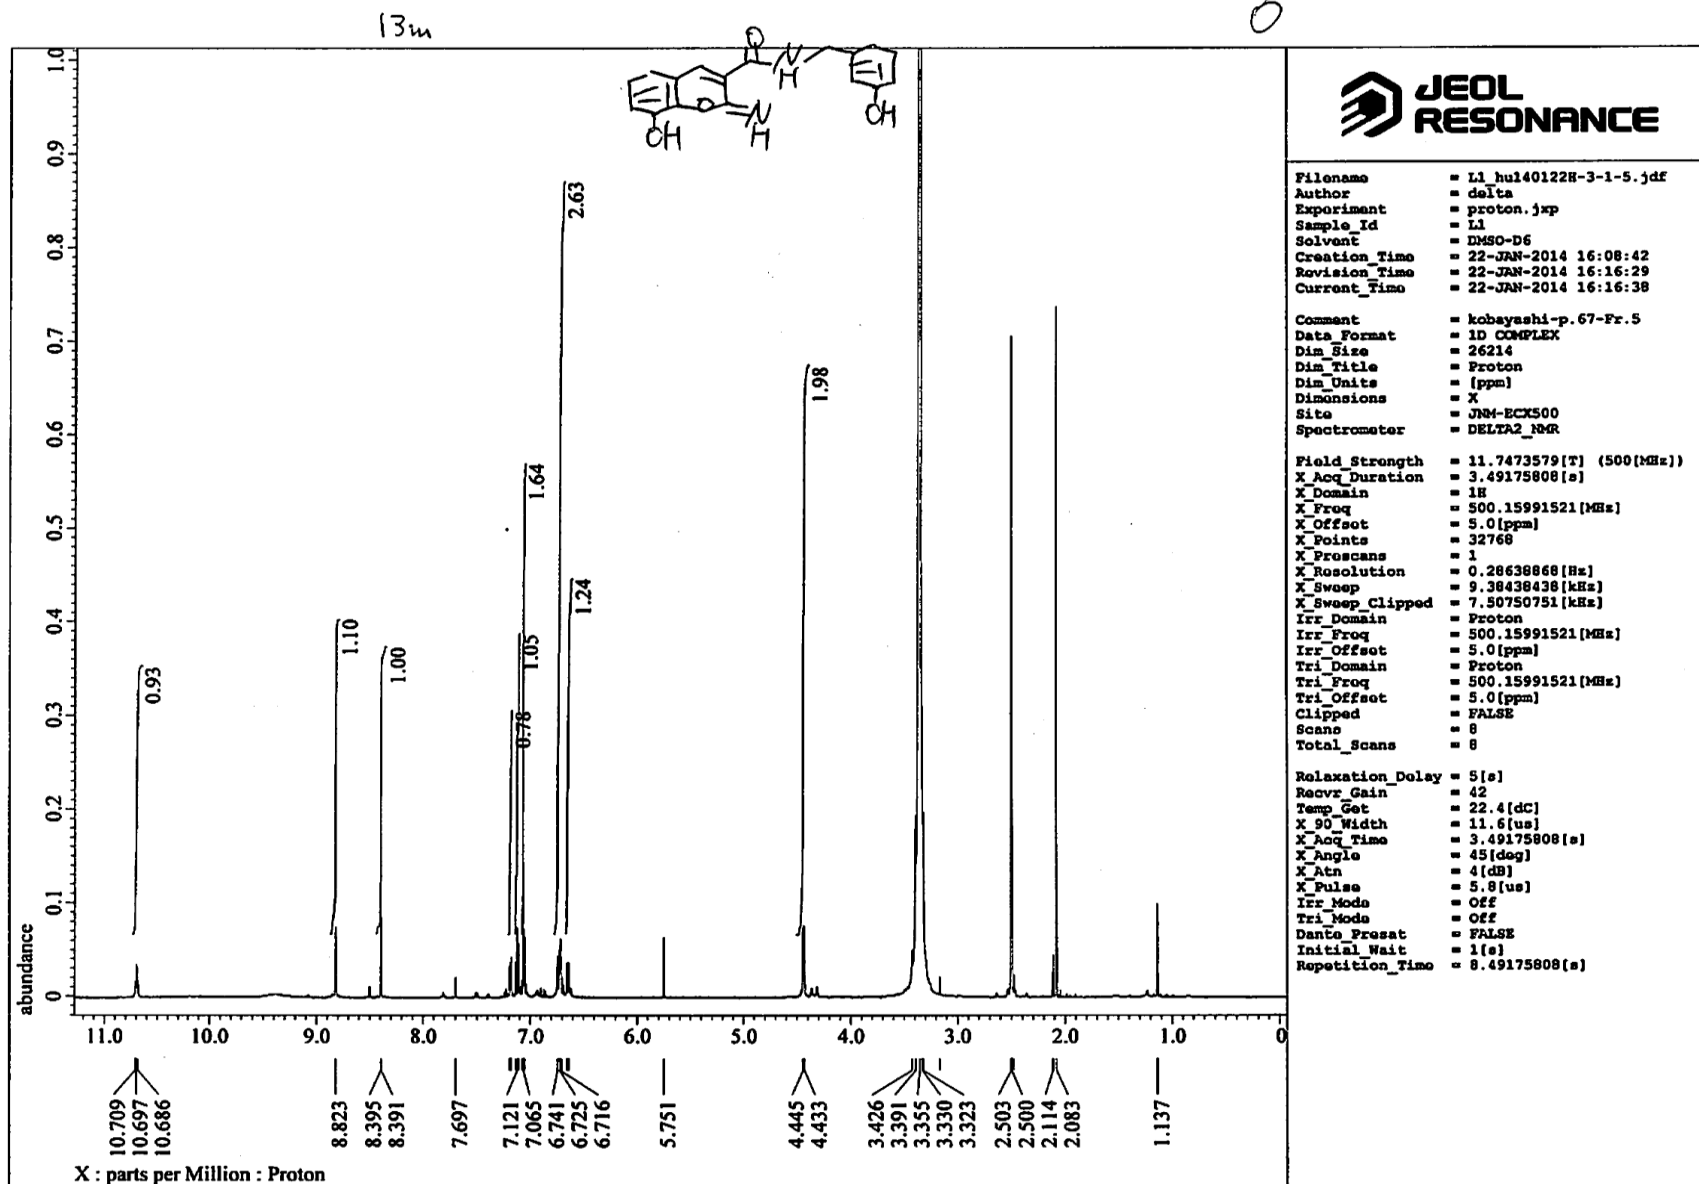

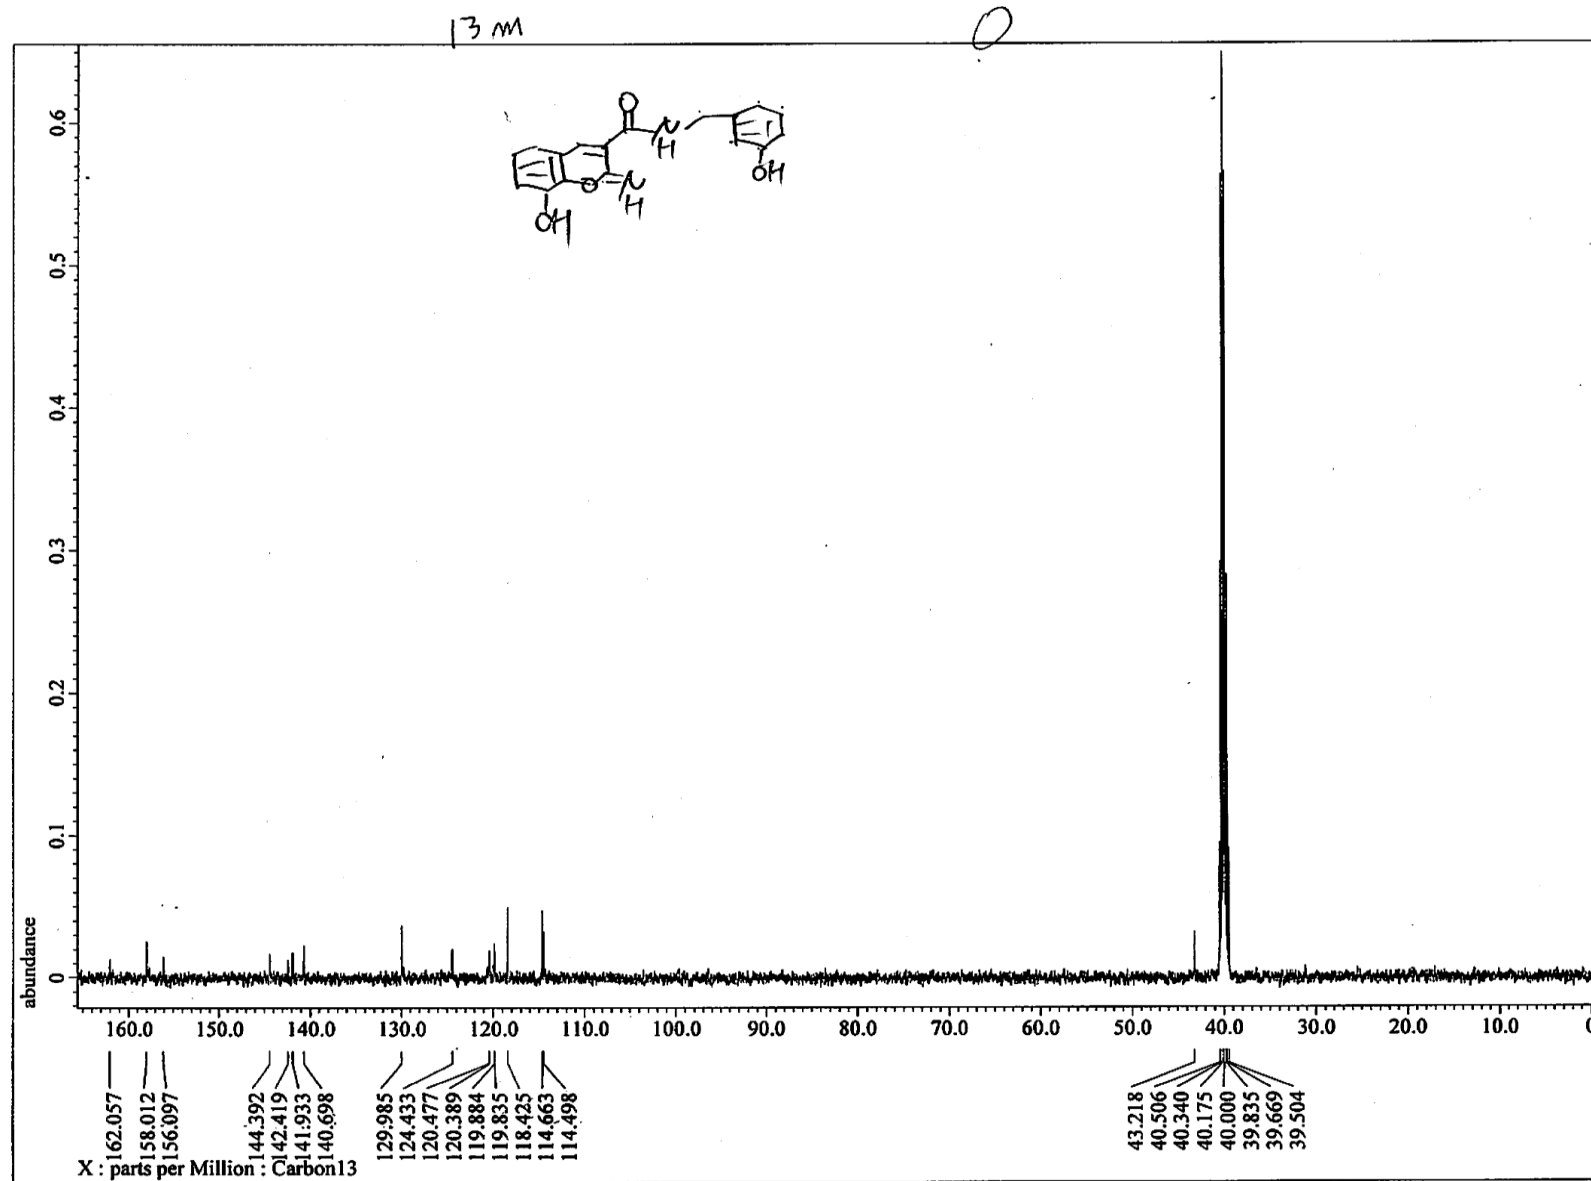

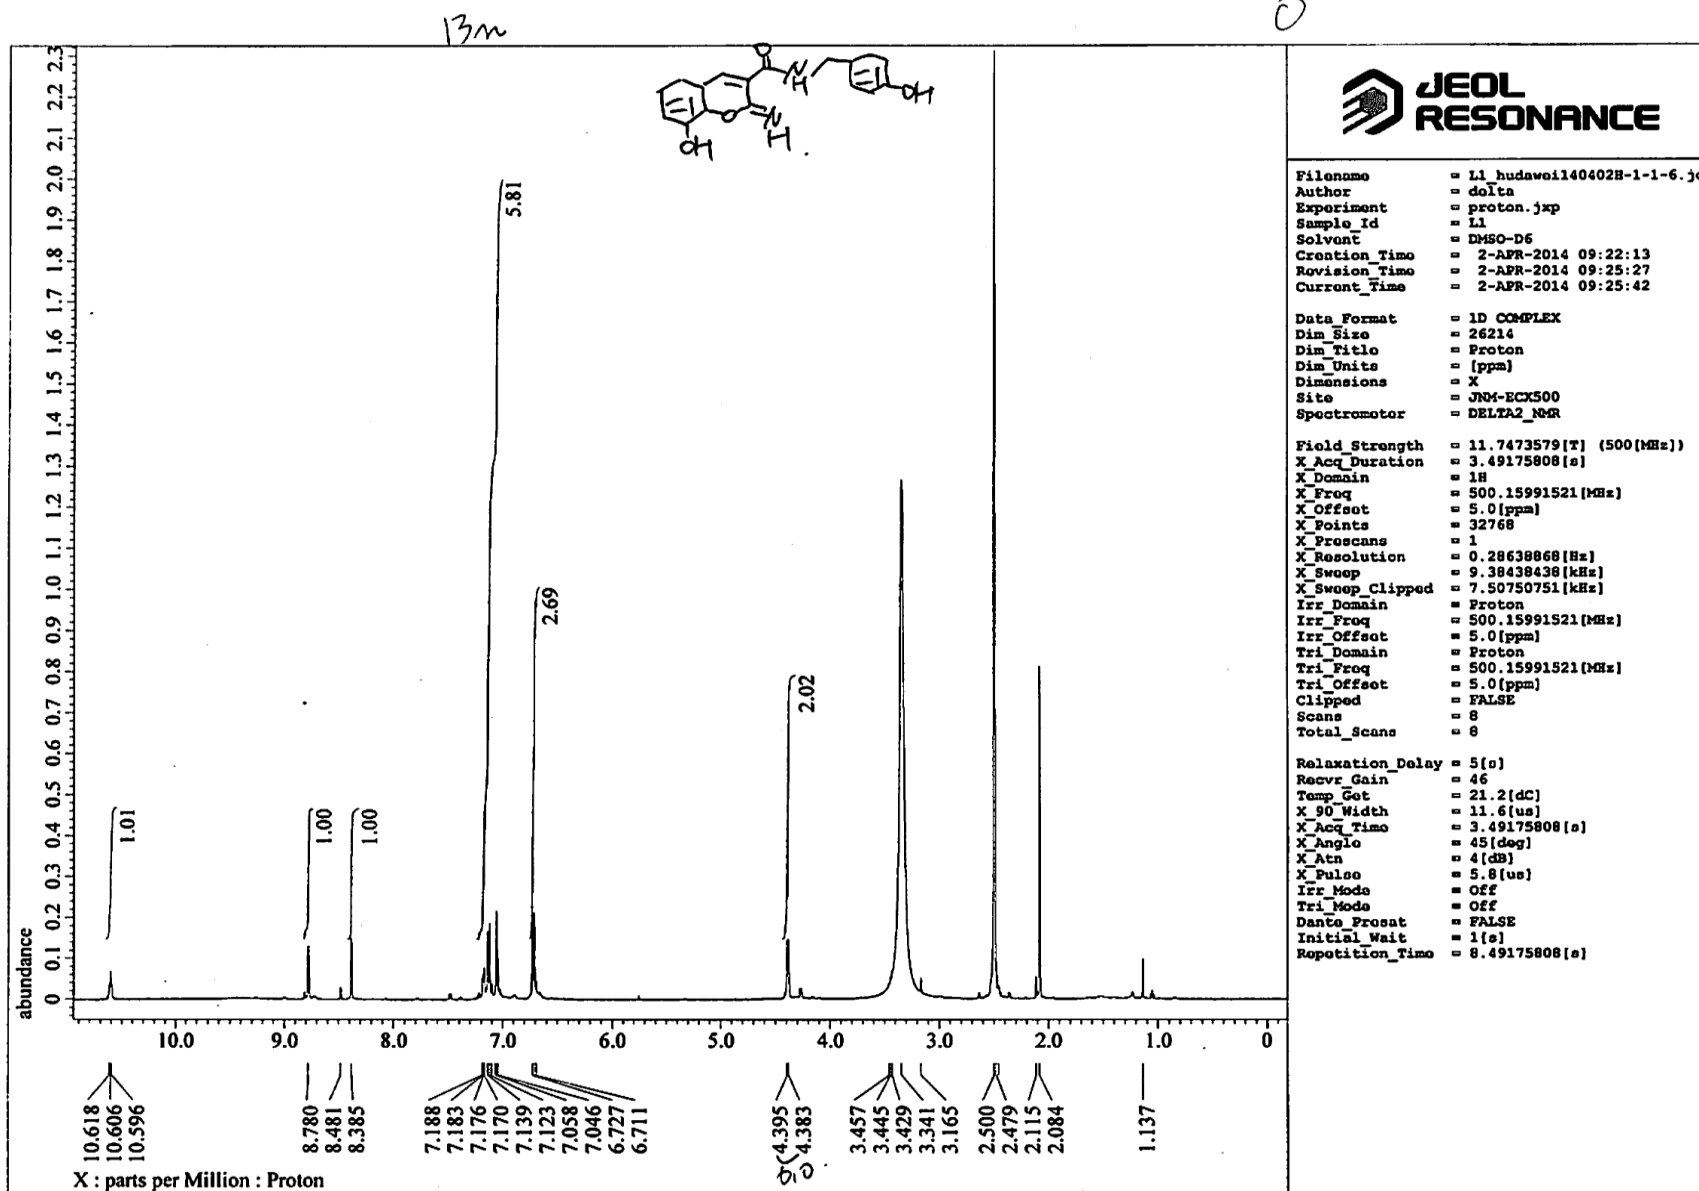

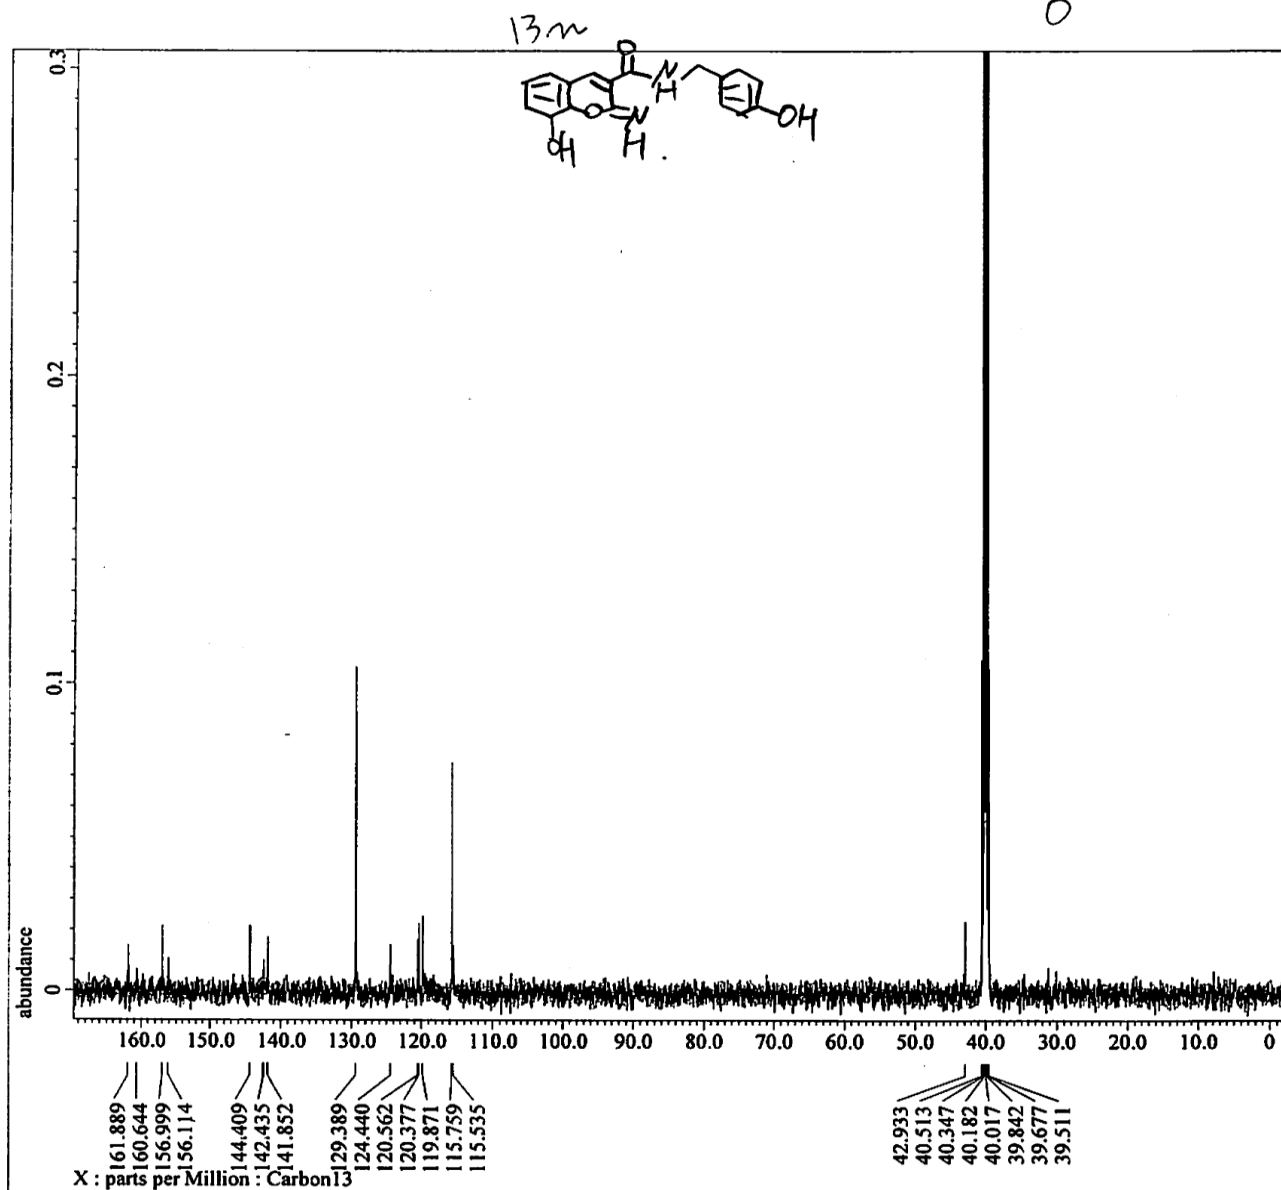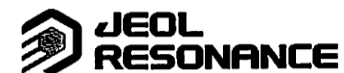

Filename = L1\_hu140410C-3-1-3.jdf  
Author = delta  
Experiment = carbon.jxp  
Sample Id = L1  
Solvent = DMSO-D6  
Creation Time = 10-APR-2014 14:43:52  
Revision Time = 10-APR-2014 15:06:47  
Current Time = 10-APR-2014 15:07:03

Data Format = 1D COMPLEX  
Dim Size = 26214  
Dim Title = Carbon13  
Dim Units = [ppm]  
Dimensions = X  
Site = JNM-ECK500  
Spectrometer = DELTA2 NMR

Field Strength = 11.7473579[T] (500[MHz])  
X Acq Duration = 0.81788928[s]  
X Domain = 13C  
X Freq = 125.76529768[MHz]  
X Offset = 100[ppm]  
X Points = 32768  
X Proscans = 4  
X Resolution = 1.22265938[Hz]  
X Sloop = 40.06410256[kHz]  
X Sloop Clipped = 32.05128205[kHz]  
Irr Domain = Proton  
Irr Freq = 500.15991521[MHz]  
Irr Offset = 5.0[ppm]  
Clipped = TRUE  
Scans = 467  
Total Scans = 467

Relaxation Delay = 2[s]  
Recvr Gain = 46  
Temp Get = 22[deg]  
X 90 Width = 9[us]  
X Acq Time = 0.81788928[s]  
X Angle = 30[deg]  
X Attn = 5.7[dB]  
X Pulse = 3[us]  
Irr Attn Dec = 21.987[dB]  
Irr Attn Noe = 21.987[dB]  
Irr Noise = WALTZ  
Irr Pwidth = 92[us]  
Decoupling = TRUE  
Initial Wait = 1[s]  
Noe = TRUE  
Noe Time = 2[s]  
Repetition Time = 2.81788928[s]



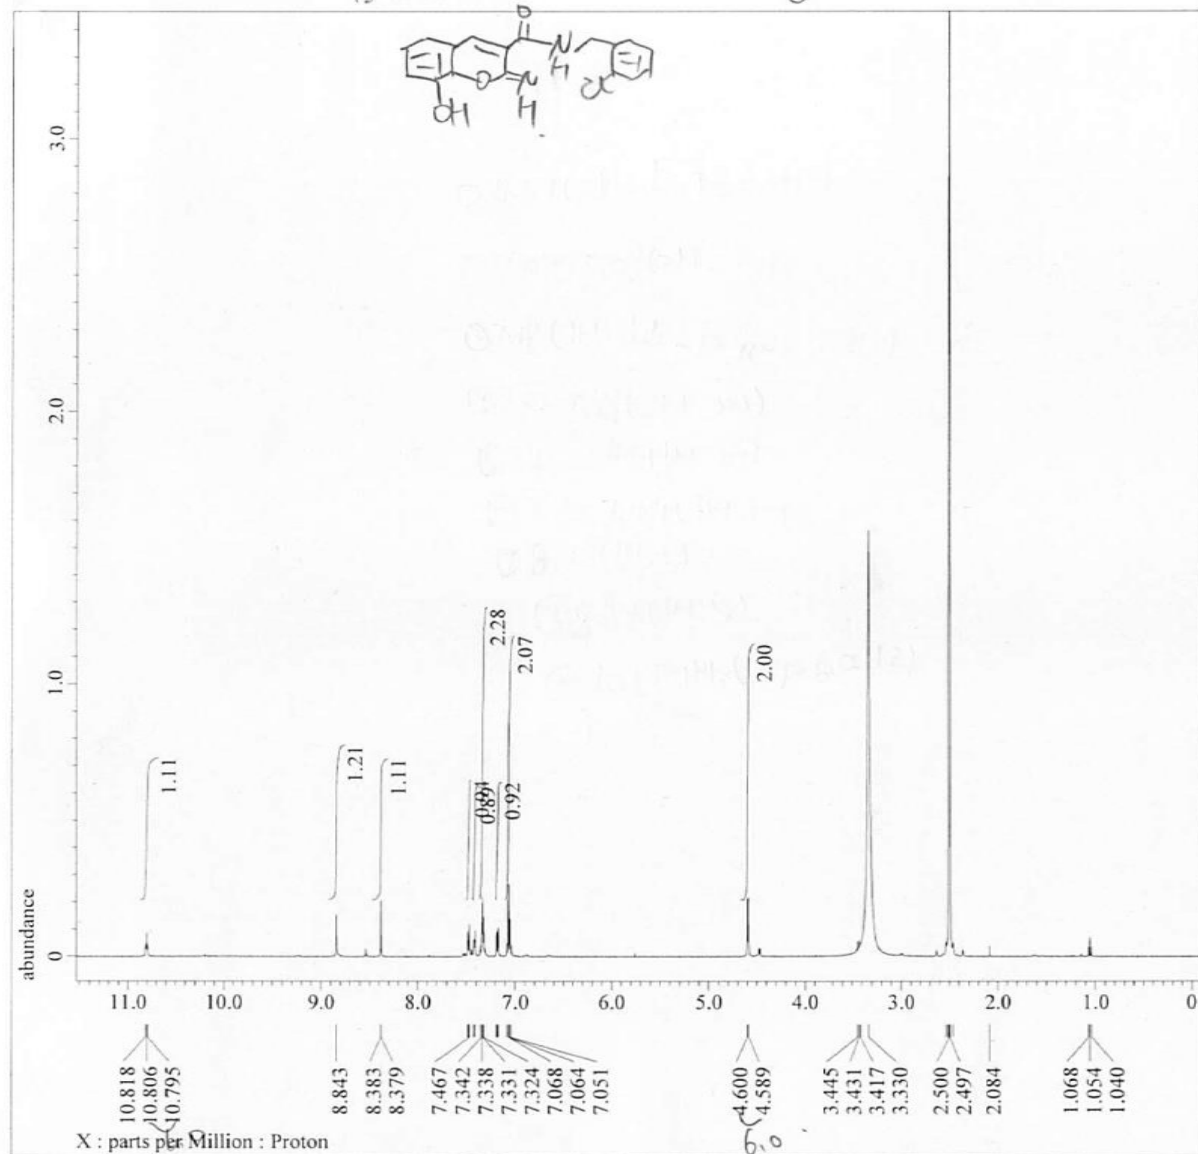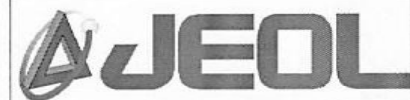

Filename = C:\Users\ws2-DATA\L1\L1  
 Author = delta  
 Experiment = proton.jxp  
 Sample\_Id = L1  
 Solvent = DMSO-D6  
 Creation\_Time = 19-MAR-2014 13:45:21  
 Revision\_Time = 7-MAY-2014 14:00:54  
 Current\_Time = 7-MAY-2014 14:01:21

Data Format = 1D COMPLEX  
 Dim\_Size = 26214  
 Dim\_Title = Proton  
 Dim\_Units = [ppm]  
 Dimensions = X  
 Site = JNM-ECX500  
 Spectrometer = DELTA2\_NMR

Field Strength = 11.7473579[T] (500[MHz])  
 X\_Acq\_Duration = 3.49175808[s]  
 X\_Domain = 1H  
 X\_Freq = 500.15991521[MHz]  
 X\_Offset = 5.0[ppm]  
 X\_Points = 32768  
 X\_Prescans = 1  
 X\_Resolution = 0.28638868[Hz]  
 X\_Sweep = 9.38438438[kHz]  
 X\_Sweep\_Clippped = 7.50750751[kHz]  
 Irr\_Domain = Proton  
 Irr\_Freq = 500.15991521[MHz]  
 Irr\_Offset = 5.0[ppm]  
 Tri\_Domain = Proton  
 Tri\_Freq = 500.15991521[MHz]  
 Tri\_Offset = 5.0[ppm]  
 Clipped = FALSE  
 Scans = 8  
 Total\_Scans = 8

Relaxation\_Delay = 5[s]  
 Recvr\_Gain = 48  
 Temp\_Get = 22.7[dC]  
 X\_90\_Width = 11.6[us]  
 X\_Acq\_Time = 3.49175808[s]  
 X\_Angle = 45[deg]  
 X\_Atn = 4[dB]  
 X\_Pulse = 5.8[us]  
 Irr\_Mode = Off  
 Tri\_Mode = Off  
 Dante\_Preset = FALSE  
 Initial\_Wait = 1[s]  
 Repetition\_Time = 8.49175808[s]

13C 30

0

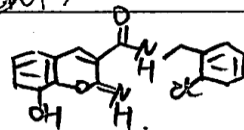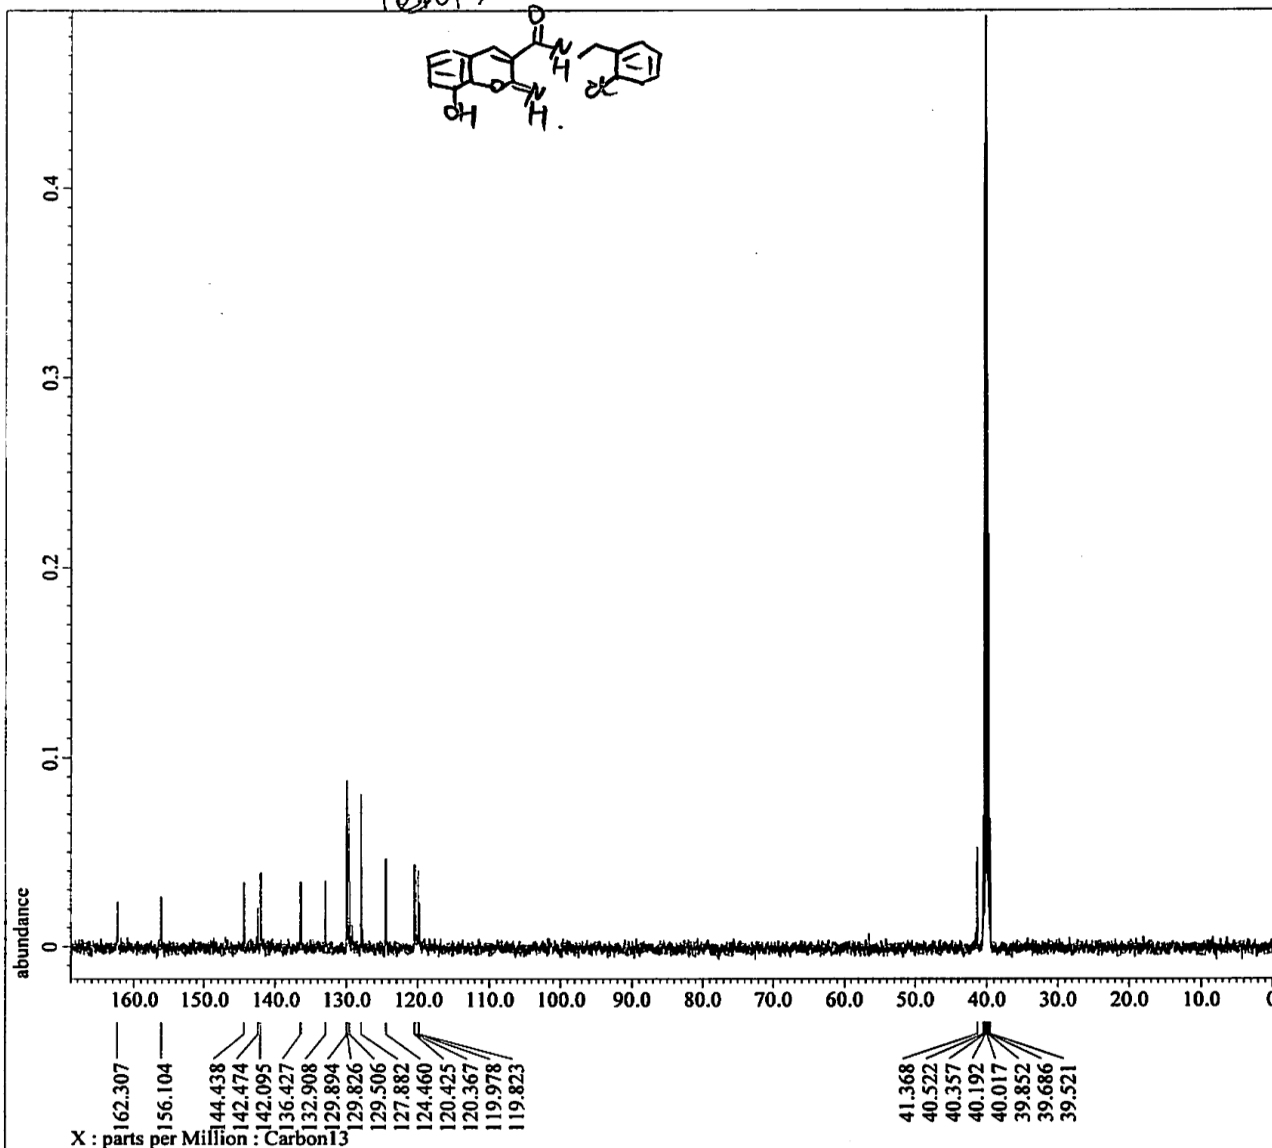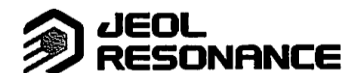

Filename = LI\_hu140414C-1-1-3.jdf  
 Author = delta  
 Experiment = carbon.jpg  
 Sample Id = LI  
 Solvent = DMSO-D6  
 Creation Time = 14-APR-2014 09:08:47  
 Revision Time = 14-APR-2014 09:27:32  
 Current Time = 14-APR-2014 09:28:17

Data Format = 1D COMPLEX  
 Dim Size = 26214  
 Dim Title = Carbon13  
 Dim Units = [ppm]  
 Dimensions = X  
 Site = JNM-ECX500  
 Spectrometer = DELTA2 NMR

Field Strength = 11.7473579[T] (500[MHz])  
 X Acq Duration = 0.81788928[s]  
 X Domain = 13C  
 X Freq = 125.76529768[MHz]  
 X Offset = 100[ppm]  
 X Points = 32768  
 X Proscans = 4  
 X Resolution = 1.22265938[Hz]  
 X Swoop = 40.06410256[kHz]  
 X Swoop Clipped = 32.05128205[kHz]  
 Irr Domain = Proton  
 Irr Freq = 500.15991521[MHz]  
 Irr Offset = 5.0[ppm]  
 Clipped = FALSE  
 Scans = 613  
 Total Scans = 613

Relaxation Delay = 1[s]  
 Recvr Gain = 46  
 Temp Got = 21.9[dC]  
 X 90 Width = 9[us]  
 X Acq Time = 0.81788928[s]  
 X Angle = 30[deg]  
 X Atn = 5.7[dB]  
 X Pulse = 3[us]  
 Irr Atn Dec = 21.987[dB]  
 Irr Atn Noe = 21.987[dB]  
 Irr Noise = WALTZ  
 Irr Pwidth = 92[us]  
 Decoupling = TRUE  
 Initial Wait = 1[s]  
 Noo = TRUE  
 Noo Time = 1[s]  
 Repetition Time = 1.81788928[s]

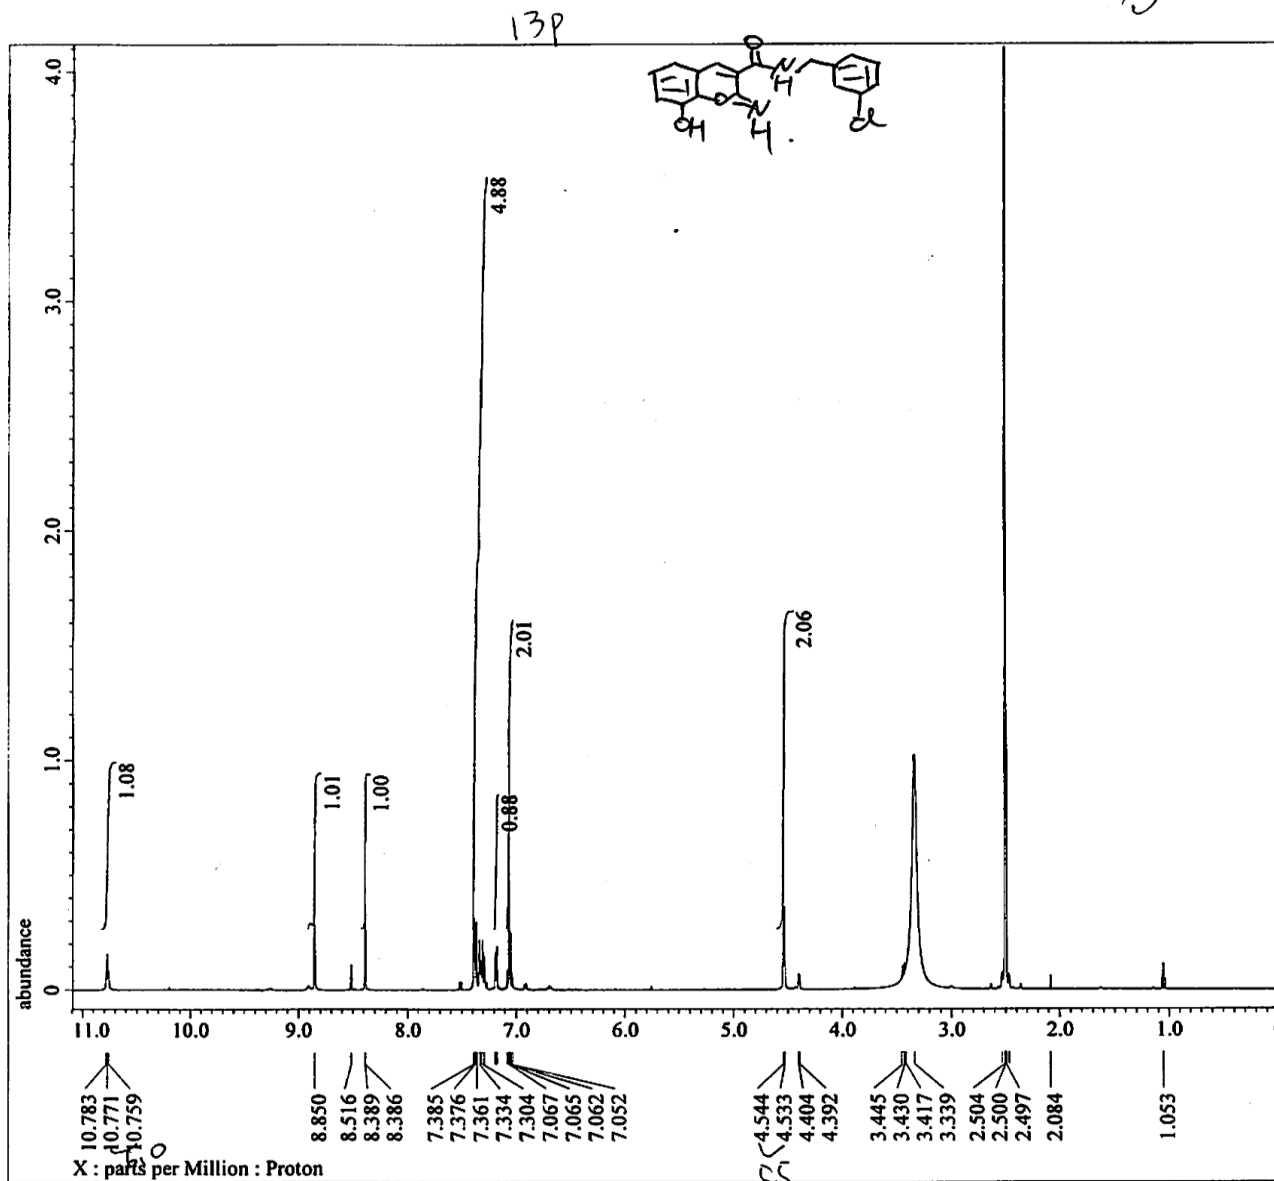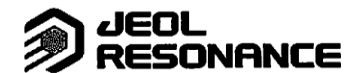

Filename = L1\_hudawei140402H-2-1-5.jd  
 Author = delta  
 Experiment = proton.jpg  
 Sample Id = L1  
 Solvent = DMSO-D6  
 Creation Time = 2-APR-2014 09:28:55  
 Revision Time = 2-APR-2014 09:31:02  
 Current Time = 2-APR-2014 09:31:30

Data Format = 1D COMPLEX  
 Dim Size = 26214  
 Dim Title = Proton  
 Dim Units = [ppm]  
 Dimensions = X  
 Site = JNM-ECX500  
 Spectrometer = DELTA2 NMR  
 Field Strength = 11.7473579[T] (500[MHz])  
 X\_Acq\_Duration = 3.49175808[s]  
 X\_Domain = 1H  
 X\_Freq = 500.15991521[MHz]  
 X\_Offset = 5.0[ppm]  
 X\_Points = 32768  
 X\_Prescans = 1  
 X\_Resolution = 0.28638868[Hz]  
 X\_Sweep = 9.38438438[kHz]  
 X\_Sweep\_Clipped = 7.50750751[kHz]  
 Irr\_Domain = Proton  
 Irr\_Freq = 500.15991521[MHz]  
 Irr\_Offset = 5.0[ppm]  
 Tri\_Domain = Proton  
 Tri\_Freq = 500.15991521[MHz]  
 Tri\_Offset = 5.0[ppm]  
 Clipped = FALSE  
 Scans = 8  
 Total\_Scans = 8

Relaxation Delay = 5[s]  
 Recvr Gain = 48  
 Temp\_Gat = 21.3[dc]  
 X\_90\_Width = 11.6[us]  
 X\_Acq\_Time = 3.49175808[s]  
 X\_Angle = 45[deg]  
 X\_Atn = 4[db]  
 X\_Pulse = 5.8[us]  
 Irr\_Mode = Off  
 Tri\_Mode = Off  
 Datto\_Presat = FALSE  
 Initial Wait = 1[s]  
 Repetition Time = 8.49175808[s]

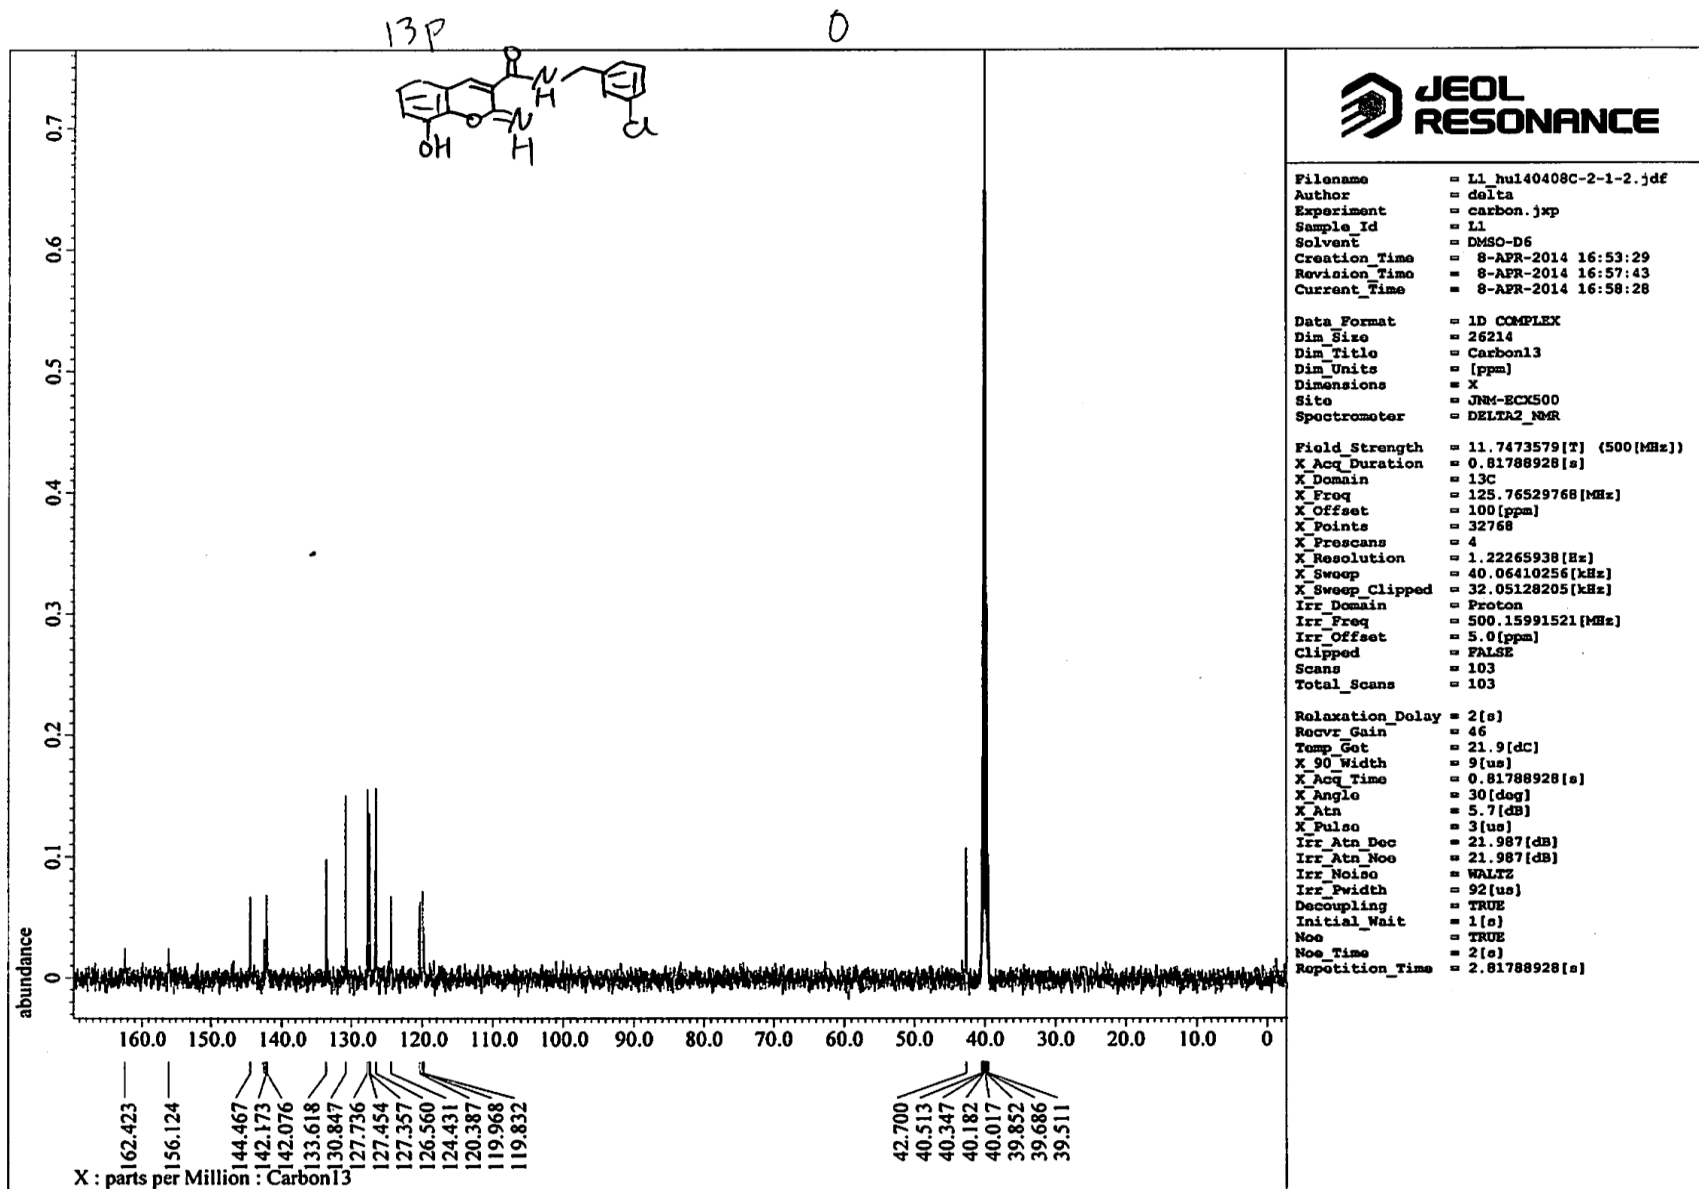

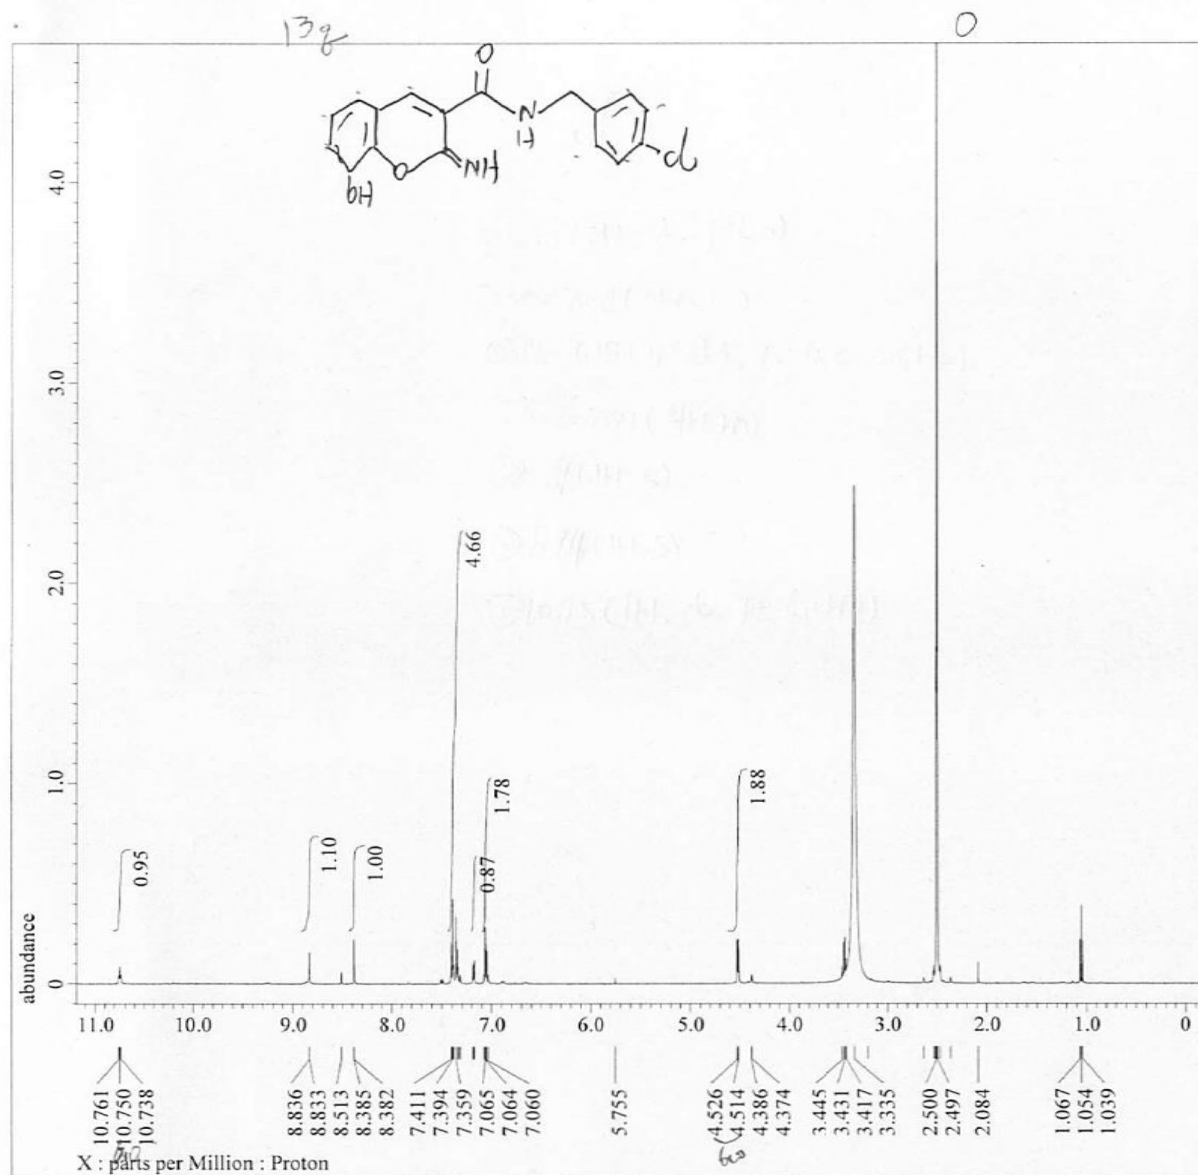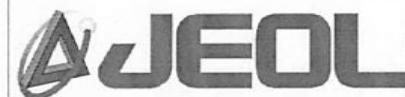

Filename = C:\Users\ws2-DATA\LI\_hu1  
 Author = delta  
 Experiment = proton.jxp  
 Sample\_Id = L1  
 Solvent = DMSO-D6  
 Creation\_Time = 4-APR-2014 13:29:36  
 Revision\_Time = 4-APR-2014 13:33:55  
 Current\_Time = 4-APR-2014 13:34:09

Data Format = 1D COMPLEX  
 Dim\_Size = 26214  
 Dim\_Title = Proton  
 Dim\_Units = [ppm]  
 Dimensions = X  
 Site = JNM-ECX500  
 Spectrometer = DELTA2\_NMR

Field\_Strength = 11.7473579[T] (500[MHz])  
 X\_Acq\_Duration = 3.49175808[s]  
 X\_Domain = 1H  
 X\_Freq = 500.15991521[MHz]  
 X\_Offset = 5.0[ppm]  
 X\_Points = 32768  
 X\_Prescans = 1  
 X\_Resolution = 0.28638868[Hz]  
 X\_Sweep = 9.38438438[kHz]  
 X\_Sweep\_Clipped = 7.50750751[kHz]  
 Irr\_Domain = Proton  
 Irr\_Freq = 500.15991521[MHz]  
 Irr\_Offset = 5.0[ppm]  
 Tri\_Domain = Proton  
 Tri\_Freq = 500.15991521[MHz]  
 Tri\_Offset = 5.0[ppm]  
 Clipped = FALSE  
 Scans = 8  
 Total\_Scans = 8

Relaxation\_Delay = 5[s]  
 Recvr\_Gain = 48  
 Temp\_Got = 22.2[dC]  
 X\_90\_Width = 11.6[us]  
 X\_Acq\_Time = 3.49175808[s]  
 X\_Angle = 45[deg]  
 X\_Atn = 4[dB]  
 X\_Pulse = 5.8[us]  
 Irr\_Mode = Off  
 Tri\_Mode = Off  
 Dante\_Presat = FALSE  
 Initial\_Wait = 1[s]  
 Repetition\_Time = 8.49175808[s]

138

0

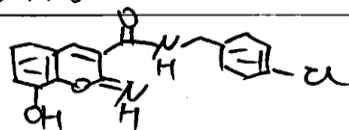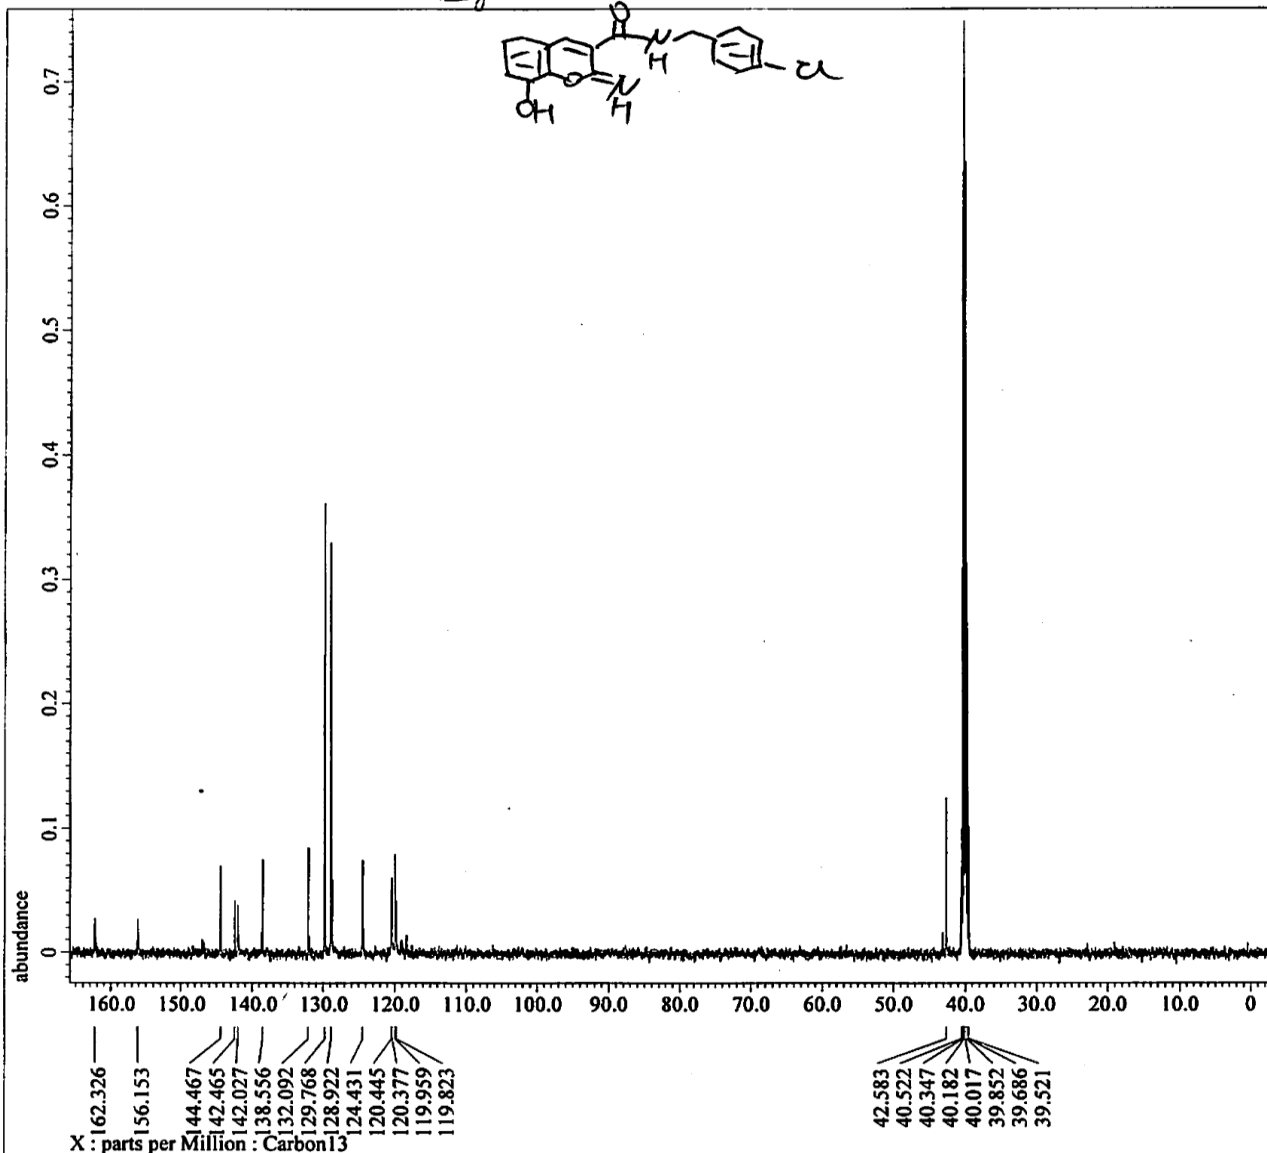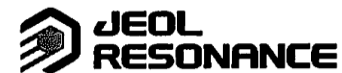

Filename = L1\_hu140411C-1-2-4.jdf  
 Author = delta  
 Experiment = carbon.jpg  
 Sample Id = L1  
 Solvent = DMSO-D6  
 Creation Time = 11-APR-2014 15:16:35  
 Revision Time = 11-APR-2014 15:39:01  
 Current Time = 11-APR-2014 15:39:15

Data Format = 1D COMPLEX  
 Dim Size = 26214  
 Dim Title = Carbon13  
 Dim Units = [ppm]  
 Dimensions = X  
 Site = JNM-ECK500  
 Spectrometer = DELTA2\_NMR

Field Strength = 11.7473579[T] (500[MHz])  
 X\_Acq\_Duration = 0.81788928[s]  
 X\_Domain = 13C  
 X\_Freq = 125.76529768[MHz]  
 X\_Offset = 100[ppm]  
 X\_Points = 32768  
 X\_Prescans = 4  
 X\_Resolution = 1.22265938[Hz]  
 X\_Sweep = 40.06410256[kHz]  
 X\_Sweep\_Clippped = 32.05128205[kHz]  
 Irr\_Domain = Proton  
 Irr\_Freq = 500.15991521[MHz]  
 Irr\_Offset = 5.0[ppm]  
 Clipped = FALSE  
 Scans = 444  
 Total\_Scans = 444

Relaxation\_Delay = 2[s]  
 Recvr\_Gain = 46  
 Temp\_Got = 22[dc]  
 X\_90\_Width = 9[us]  
 X\_Acq\_Time = 0.81788928[s]  
 X\_Angle = 30[deg]  
 X\_Atn = 5.7[dB]  
 X\_Pulse = 3[us]  
 Irr\_Atn\_Dec = 21.987[dB]  
 Irr\_Atn\_Noo = 21.987[dB]  
 Irr\_Noise = WALTZ  
 Irr\_Pwidth = 92[us]  
 Decoupling = TRUE  
 Initial\_Wait = 1[s]  
 Noo = TRUE  
 Noo\_Time = 2[s]  
 Repetition\_Time = 2.81788928[s]

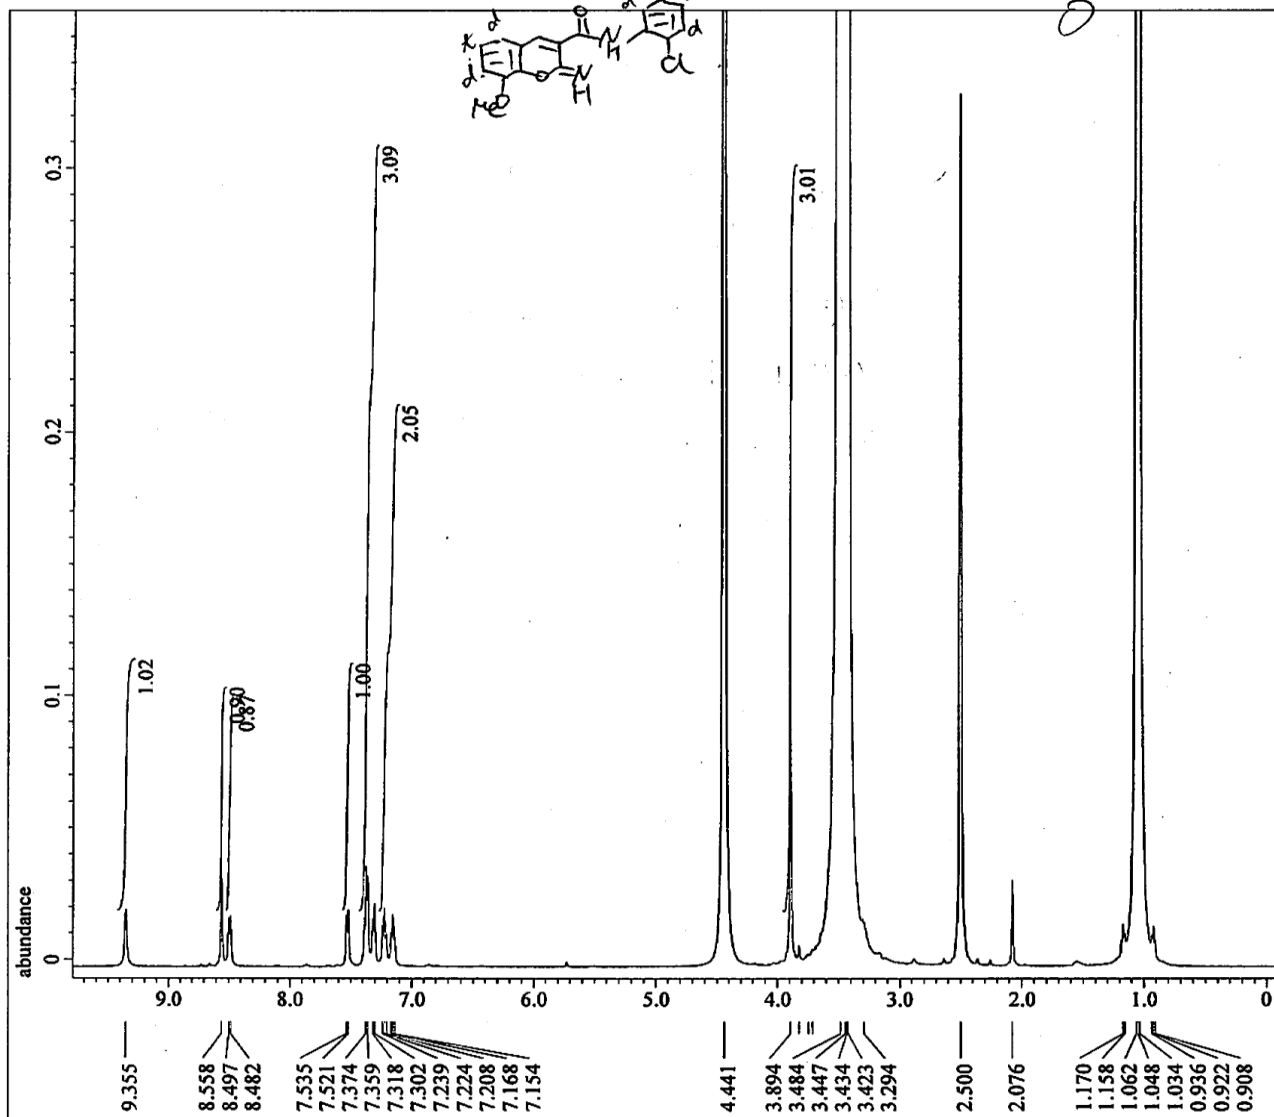

X : parts per Million : Proton

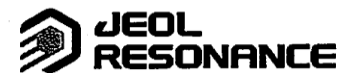

Filename = LI\_hul41223H-2-1-6.jdf  
 Author = delta  
 Experiment = proton.jpg  
 Sample Id = LI  
 Solvent = DMSO-D6  
 Creation Time = 23-DEC-2014 16:44:38  
 Revision Time = 23-DEC-2014 16:47:20  
 Current Time = 23-DEC-2014 16:47:33  
 Data Format = 1D COMPLEX  
 Dim Size = 13107  
 Dim Title = Proton  
 Dim Units = [ppm]  
 Dimensions = X  
 Site = JNM-ECX500  
 Spectrometer = DELTA2 NMR  
 Field Strength = 11.7473579[T] (500[MHz])  
 X Acq Duration = 1.74587904[s]  
 X Domain = 1H  
 X Freq = 500.15991521[MHz]  
 X Offset = 5.0[ppm]  
 X Points = 16384  
 X Prescans = 1  
 X Resolution = 0.57277737[Hz]  
 X Sweep = 9.38438438[kHz]  
 X Sweep Clipped = 7.50750751[kHz]  
 Irr Domain = Proton  
 Irr Freq = 500.15991521[MHz]  
 Irr Offset = 5.0[ppm]  
 Tri Domain = Proton  
 Tri Freq = 500.15991521[MHz]  
 Tri Offset = 5.0[ppm]  
 Clipped = FALSE  
 Scans = 32  
 Total Scans = 32  
 Relaxation Delay = 5[s]  
 Recvr Gain = 25  
 Temp Get = 20.9[dC]  
 X 90 Width = 11.6[us]  
 X Acq Time = 1.74587904[s]  
 X Angle = 45[deg]  
 X Atn = 4[dB]  
 X Pulse = 5.8[us]  
 Irr Mode = Off  
 Tri Mode = Off  
 Danto Presat = FALSE  
 Initial Wait = 1[s]  
 Repetition Time = 6.74587904[s]

15

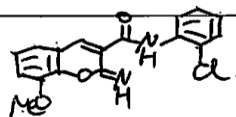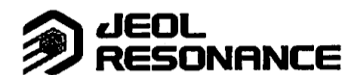

Filename = LI\_hu141225C-2-1-8.jdf  
 Author = delta  
 Experiment = carbon.jpg  
 Sample Id = LI  
 Solvent = CHLOROFORM-D  
 Creation Time = 25-DEC-2014 14:35:11  
 Revision Time = 25-DEC-2014 14:41:52  
 Current Time = 25-DEC-2014 14:42:23

Data Format = 1D COMPLEX  
 Dim Size = 26214  
 Dim Title = Carbon13  
 Dim Units = [ppm]  
 Dimensions = X  
 Site = JNM-ECX500  
 Spectrometer = DELTA2\_NMR

Field Strength = 11.7473579[T] (500[MHz])  
 X Acq Duration = 0.81788928[s]  
 X Domain = 13C  
 X Freq = 125.76529768[MHz]  
 X Offset = 100[ppm]  
 X Points = 32768  
 X Prescans = 4  
 X Resolution = 1.22265938[Hz]  
 X Sweep = 40.06410256[kHz]  
 X Sweep Clipped = 32.05128205[kHz]  
 Irr Domain = Proton  
 Irr Freq = 500.15991521[MHz]  
 Irr Offset = 5.0[ppm]  
 Clipped = FALSE  
 Scans = 152  
 Total Scans = 152

Relaxation Delay = 2[s]  
 Recvr Gain = 46  
 Temp Got = 22.8[deg]  
 X 90 Width = 9[us]  
 X Acq Time = 0.81788928[s]  
 X Angle = 30[deg]  
 X Atn = 5.7[dB]  
 X Pulse = 3[us]  
 Irr Atn Dec = 21.987[dB]  
 Irr Atn Noe = 21.987[dB]  
 Irr Noise = WALTZ  
 Irr Pwidth = 92[us]  
 Decoupling = TRUE  
 Initial Wait = 1[s]  
 Noe = TRUE  
 Noe Time = 2[s]  
 Repetition Time = 2.81788928[s]

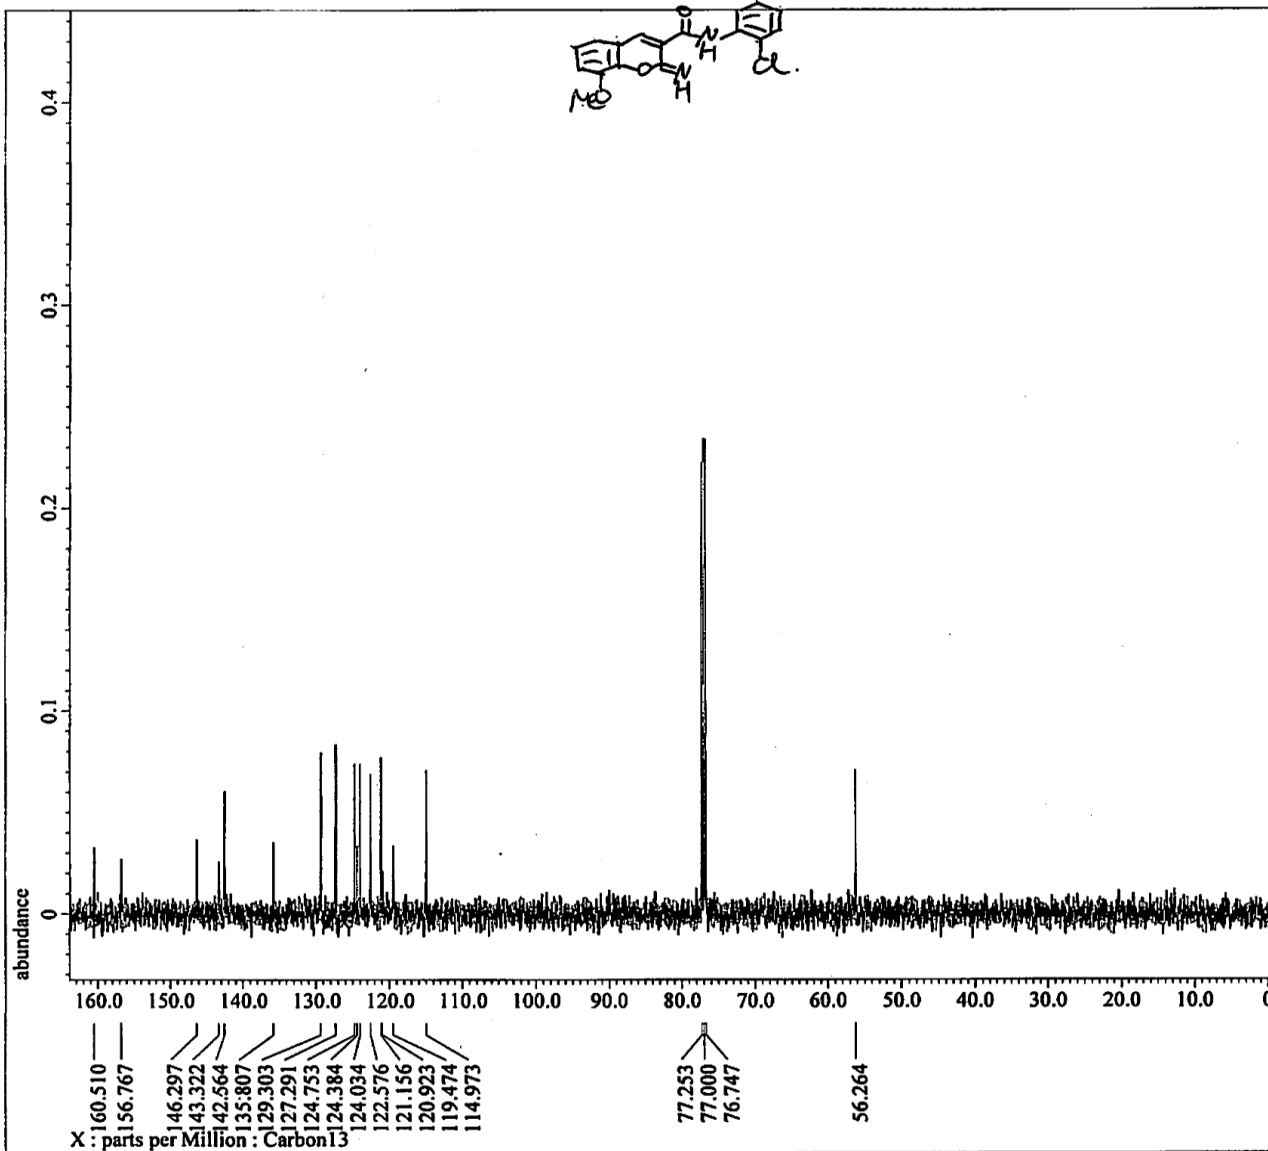



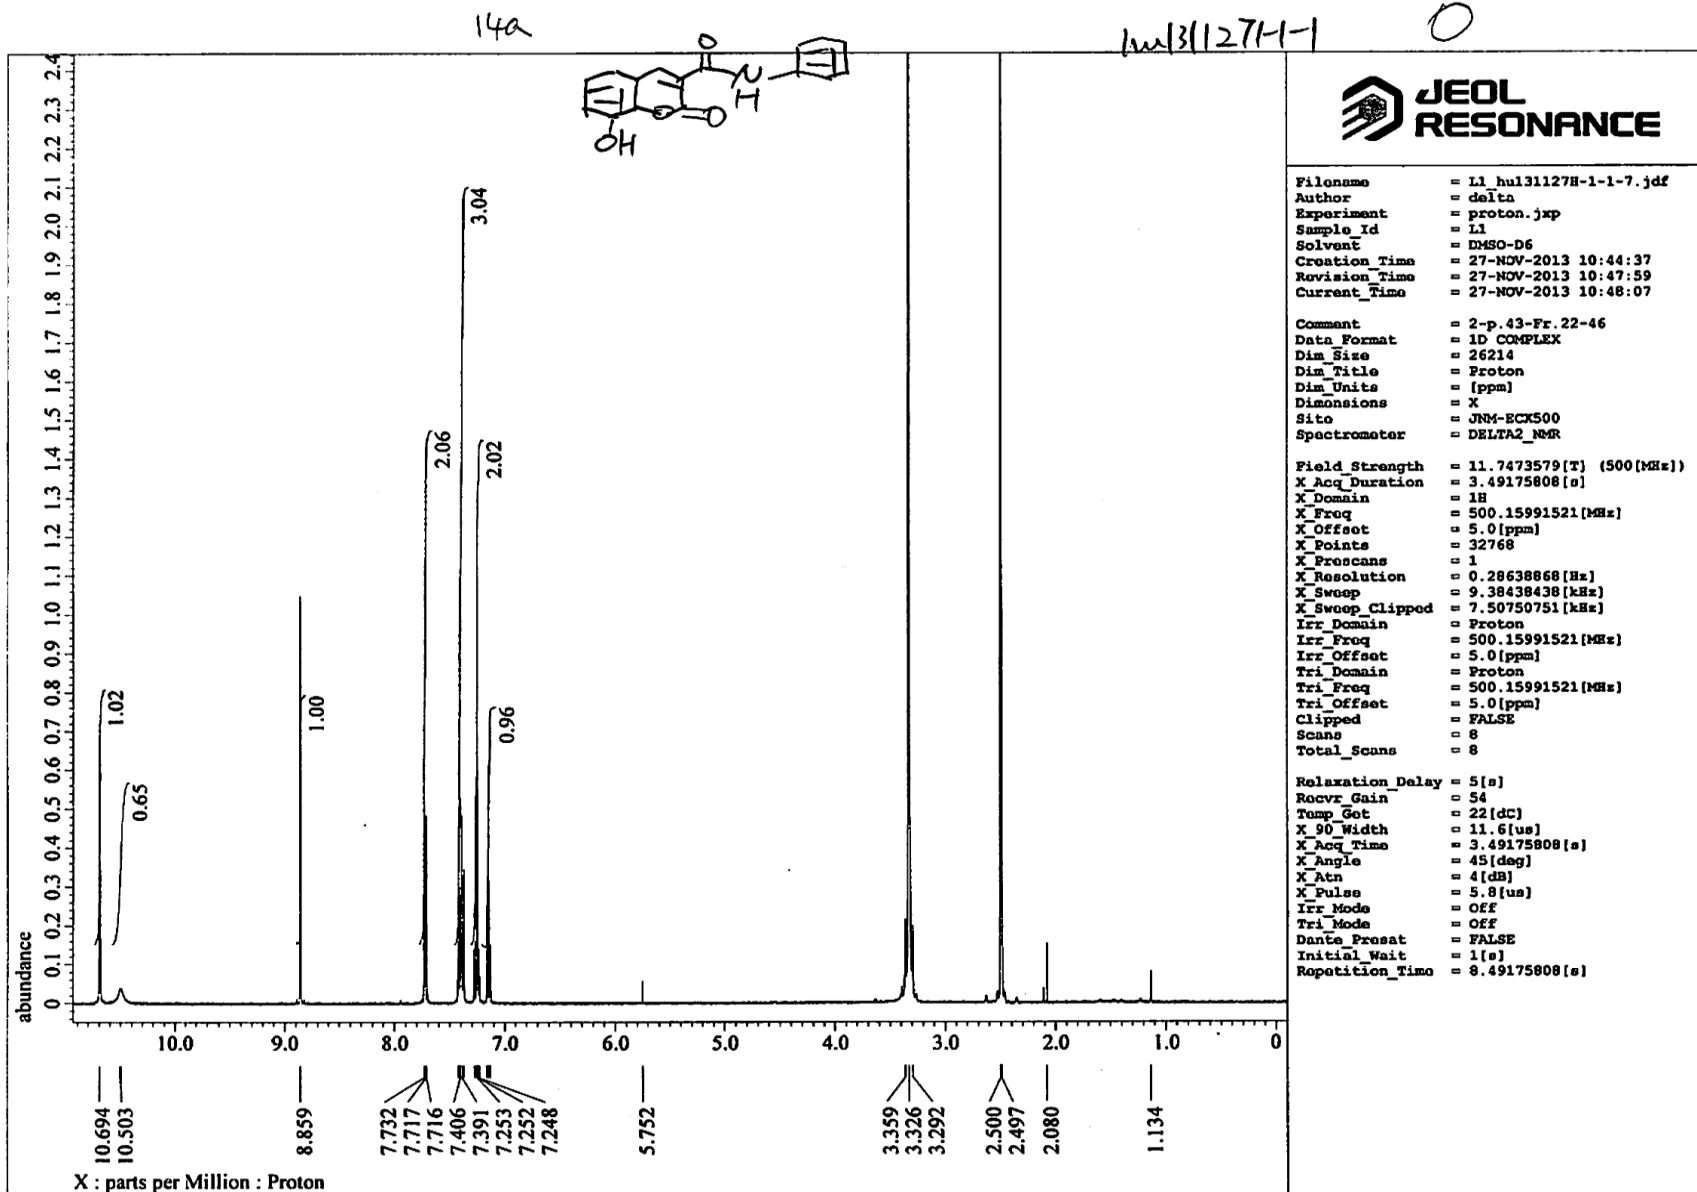

14a

D

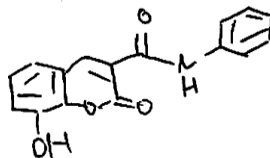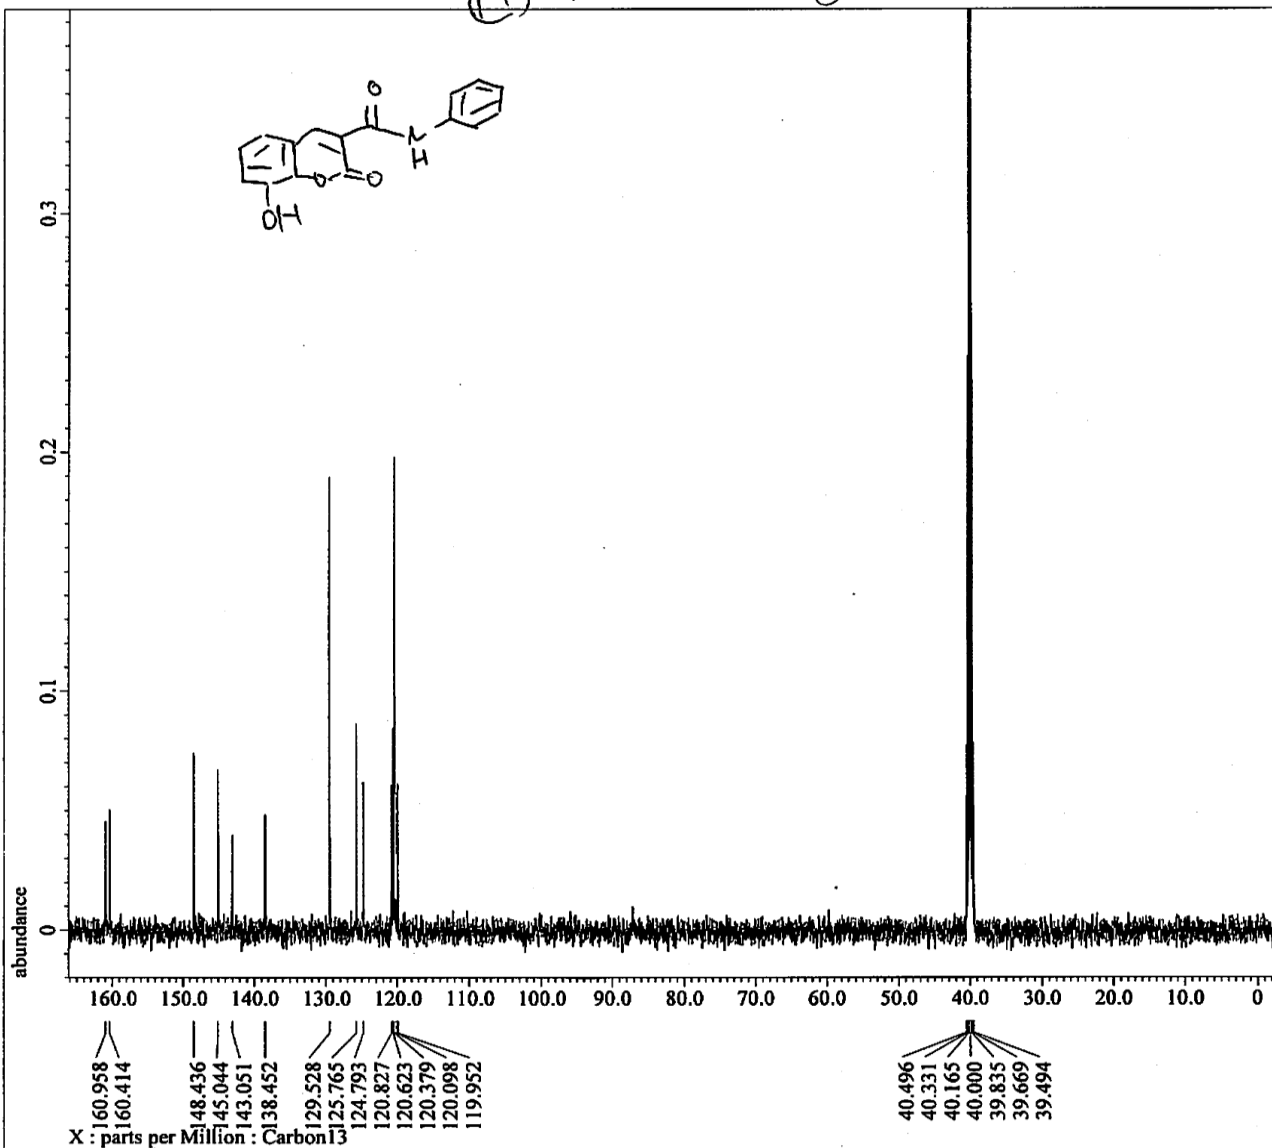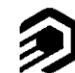

JEOL  
RESONANCE

Filename = LI\_ifuku20131225-C02-1-3.j  
Author = delta  
Experiment = carbon.jxp  
Sample Id = LI  
Solvent = DMSO-D6  
Creation Time = 25-DEC-2013 13:36:42  
Revision Time = 25-DEC-2013 13:44:59  
Current Time = 25-DEC-2013 13:45:18

Data Format = 1D COMPLEX  
Dim Size = 26214  
Dim Title = Carbon13  
Dim Units = [ppm]  
Dimensions = X  
Site = JNM-ECS500  
Spectrometer = DELTA2 NMR

Field Strength = 11.7473579[T] (500 MHz)  
X Acq Duration = 0.81788928[s]  
X Domain = 13C  
X Freq = 125.76529768[MHz]  
X Offset = 100[ppm]  
X Points = 32768  
X Prescans = 4  
X Resolution = 1.22265938[Hz]  
X Sweep = 40.06410256[kHz]  
X Sweep Clipped = 32.05128205[kHz]  
Irr Domain = Proton  
Irr Freq = 500.15991521[MHz]  
Irr Offset = 5.0[ppm]  
Clipped = FALSE  
Scans = 256  
Total Scans = 256

Relaxation Delay = 1[s]  
Recvr Gain = 46  
Temp Get = 22.2[dC]  
X 90 Width = 9[us]  
X Acq Time = 0.81788928[s]  
X Angle = 30[deg]  
X Atn = 5.7[dB]  
X Pulse = 3[us]  
Irr Atn Dec = 21.987[dB]  
Irr Atn Noe = 21.987[dB]  
Irr Noise = WALTZ  
Irr Pwidth = 92[us]  
Decoupling = TRUE  
Initial Wait = 1[s]  
Noe = TRUE  
Noe Time = 1[s]  
Repetition Time = 1.81788928[s]

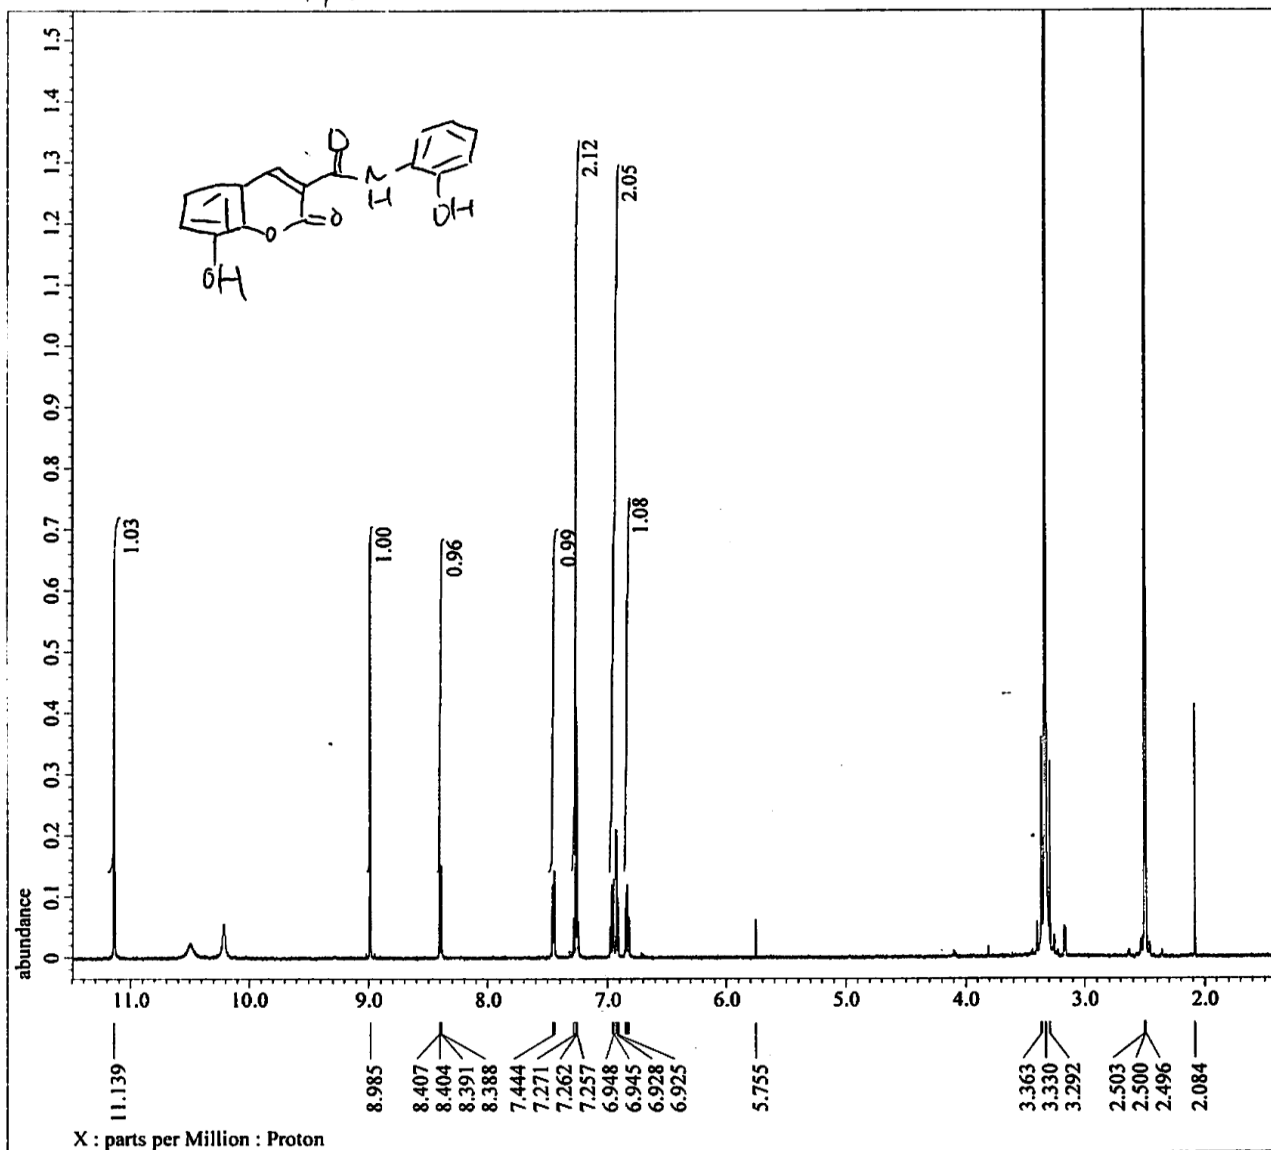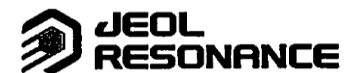

Filename = LI\_ifuku20131205-B01-1-4.j  
 Author = delta  
 Experiment = proton.jpg  
 Sample\_Id = LI  
 Solvent = DMSO-D6  
 Creation Time = 5-DEC-2013 14:31:26  
 Revision Time = 5-DEC-2013 14:35:32  
 Current Time = 5-DEC-2013 14:36:22

Data Format = 1D COMPLEX  
 Dim Size = 26214  
 Dim Title = Proton  
 Dim Units = [ppm]  
 Dimensions = X  
 Site = JNM-ECK500  
 Spectrometer = DELTA2 NMR

Field Strength = 11.7473579[T] (500[MHz])  
 X\_Acq\_Duration = 3.49175808[s]  
 X\_Domain = 1H  
 X\_Freq = 500.15991521[MHz]  
 X\_Offset = 5.0[ppm]  
 X\_Points = 32768  
 X\_Prescans = 1  
 X\_Resolution = 0.28638868[Hz]  
 X\_Sweep = 9.38438438[kHz]  
 X\_Sweep\_Clipped = 7.50750751[kHz]  
 Irr\_Domain = Proton  
 Irr\_Freq = 500.15991521[MHz]  
 Irr\_Offset = 5.0[ppm]  
 Tri\_Domain = Proton  
 Tri\_Freq = 500.15991521[MHz]  
 Tri\_Offset = 5.0[ppm]  
 Clipped = FALSE  
 Scans = 4  
 Total\_Scans = 4

Relaxation\_Delay = 5[s]  
 Recvr\_Gain = 52  
 Temp\_Get = 22.3[dC]  
 X\_90\_Width = 11.6[us]  
 X\_Acq\_Time = 3.49175808[s]  
 X\_Angle = 45[deg]  
 X\_P1n = 4[us]  
 X\_P1n2 = 5.8[us]  
 Irr\_Mode = Off  
 Tri\_Mode = Off  
 Datto\_Presat = FALSE  
 Initial\_Wait = 1[s]  
 Repetition\_Time = 8.49175808[s]

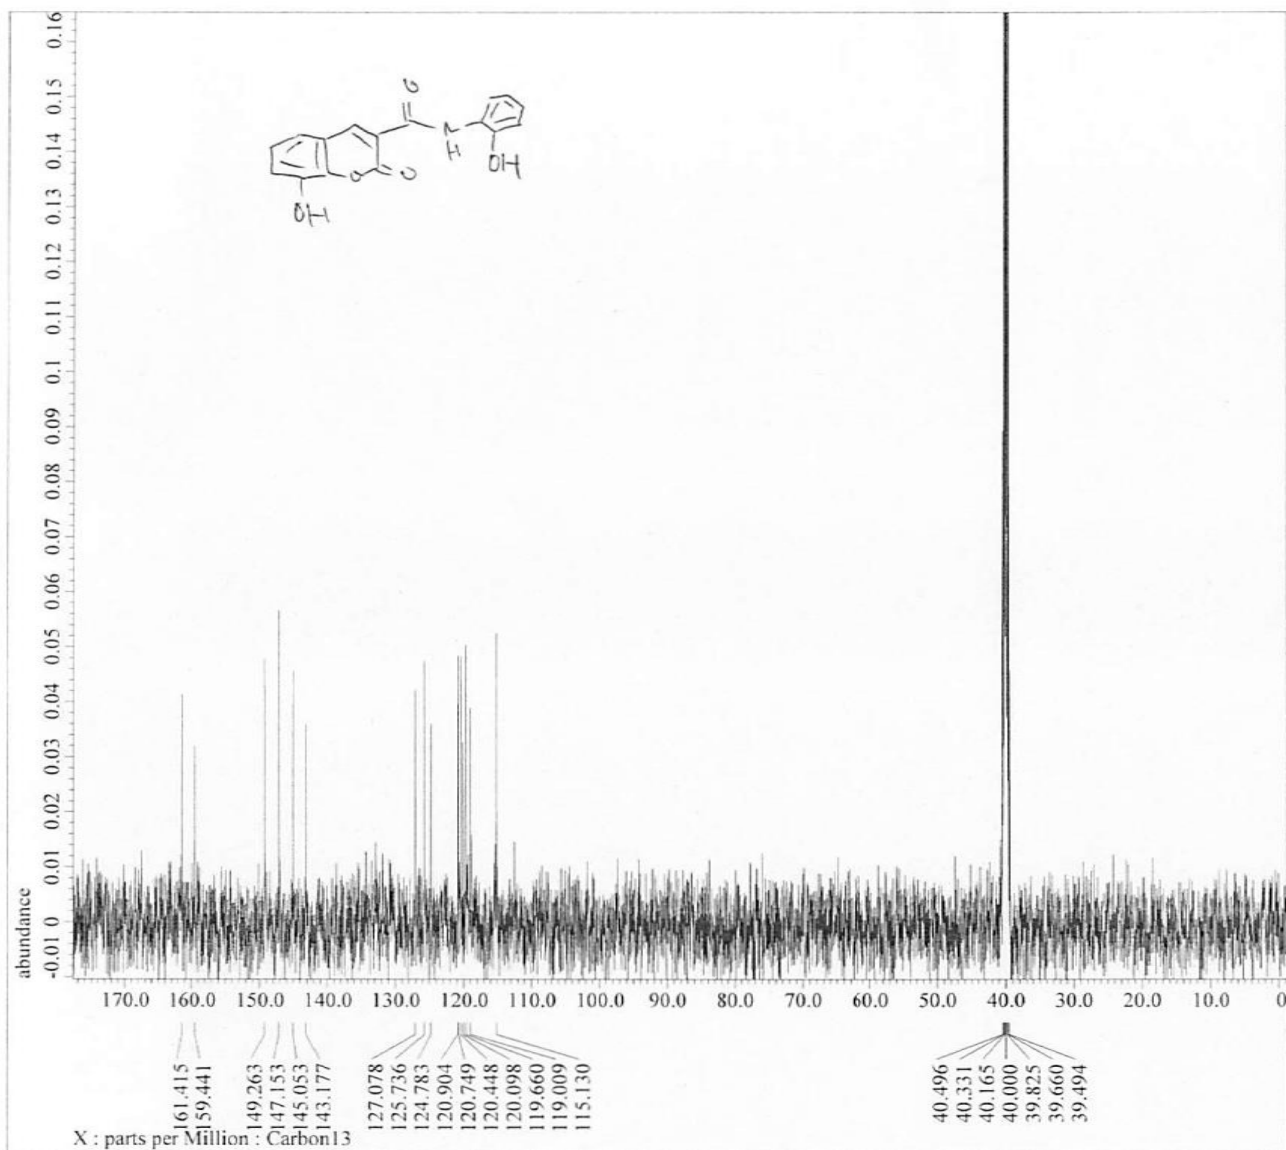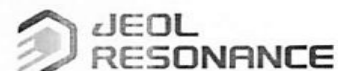

Filename = 11\_ifuku20131218-C02-1-3.j  
 Author = delta  
 Experiment = carbon.jpg  
 Sample Id = 11  
 Solvent = DMSO-D6  
 Creation Time = 18-DEC-2013 14:06:31  
 Revision Time = 18-DEC-2013 14:10:15  
 Current Time = 18-DEC-2013 14:10:37

Data Format = 1D COMPLEX  
 Dim Size = 26214  
 Dim Title = Carbon13  
 Dim Units = [ppm]  
 Dimensions = X  
 Site = JNM-ECX500  
 Spectrometer = DELTA2 NMR

Field Strength = 11.7473579[T] (500[MHz])  
 X Acq Duration = 0.81788928[s]  
 X Domain = 13C  
 X Freq = 125.76529768[MHz]  
 X Offset = 100[ppm]  
 X Points = 32768  
 X Prescans = 4  
 X Resolution = 1.22265938[Hz]  
 X Sweep = 40.06410256[kHz]  
 X Sweep Clipped = 32.05128205[kHz]  
 Irr Domain = Proton  
 Irr Freq = 500.15991521[MHz]  
 Irr Offset = 5.0[ppm]  
 Clipped = FALSE  
 Scans = 66  
 Total Scans = 66

Relaxation Delay = 2[s]  
 Recvr Gain = 44  
 Temp Get = 22.7[dC]  
 X 90 Width = 9[us]  
 X Acq Time = 0.81788928[s]  
 X Angle = 30[deg]  
 X Atn = 5.7[dB]  
 X Pulse = 3[us]  
 Irr Atn Dec = 21.987[dB]  
 Irr Atn Noe = 21.987[dB]  
 Irr Noise = WALTZ  
 Irr Pwidth = 92[us]  
 Decoupling = TRUE  
 Initial Wait = 1[s]  
 Noe = TRUE  
 Noe Time = 2[s]  
 Repetition Time = 2.81788928[s]

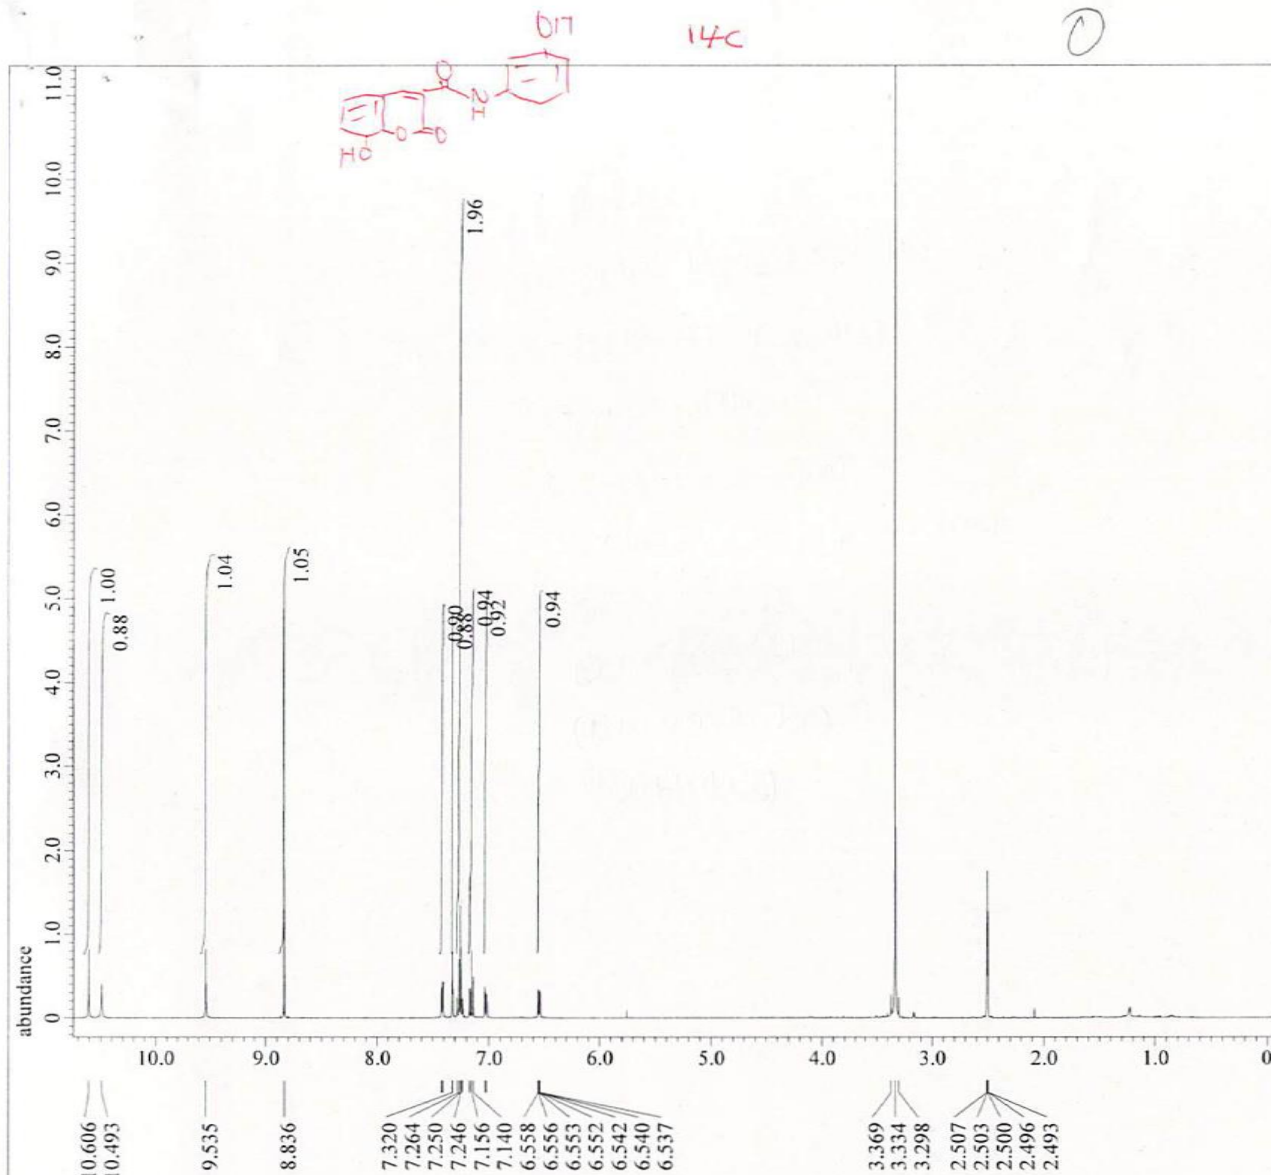

X : parts per Million : Proton

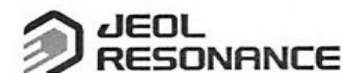

Filename = L1\_aol126H-1-1-7.jdf  
 Author = delta  
 Experiment = proton.jxp  
 Sample\_Id = L1  
 Solvent = DMSO-D6  
 Creation\_Time = 26-NOV-2013 20:18:19  
 Revision\_Time = 26-NOV-2013 20:21:34  
 Current\_Time = 26-NOV-2013 20:21:59  
  
 Comment = 2-p.43-Fr.22-46  
 Data\_Format = 1D\_COMPLEX  
 Dim\_Size = 26214  
 Dim\_Title = Proton  
 Dim\_Units = [ppm]  
 Dimensions = X  
 Site = JNM-ECX500  
 Spectrometer = DELTA2\_NMR  
  
 Field\_Strength = 11.7473579[T] (500[MHz])  
 X\_Acq\_Duration = 3.49175808[s]  
 X\_Domain = 1H  
 X\_Freq = 500.15991521[MHz]  
 X\_Offset = 5.0[ppm]  
 X\_Points = 32768  
 X\_Prescans = 1  
 X\_Resolution = 0.28638868[Hz]  
 X\_Sweep = 9.38438438[kHz]  
 X\_Sweep\_Clippped = 7.50750751[kHz]  
 Irr\_Domain = Proton  
 Irr\_Freq = 500.15991521[MHz]  
 Irr\_Offset = 5.0[ppm]  
 Tri\_Domain = Proton  
 Tri\_Freq = 500.15991521[MHz]  
 Tri\_Offset = 5.0[ppm]  
 Clipped = FALSE  
 Scans = 7  
 Total\_Scans = 7  
  
 Relaxation\_Delay = 5[s]  
 Recvr\_Gain = 50  
 Temp\_Get = 22.3[dC]  
 X\_90\_Width = 11.6[us]  
 X\_Acq\_Time = 3.49175808[s]  
 X\_Angle = 45[deg]  
 X\_Atn = 4[dB]  
 X\_Pulse = 5.8[us]  
 Irr\_Mode = Off  
 Tri\_Mode = Off  
 Dante\_Presat = FALSE  
 Initial\_Wait = 1[s]  
 Repetition\_Time = 8.49175808[s]

14C

D

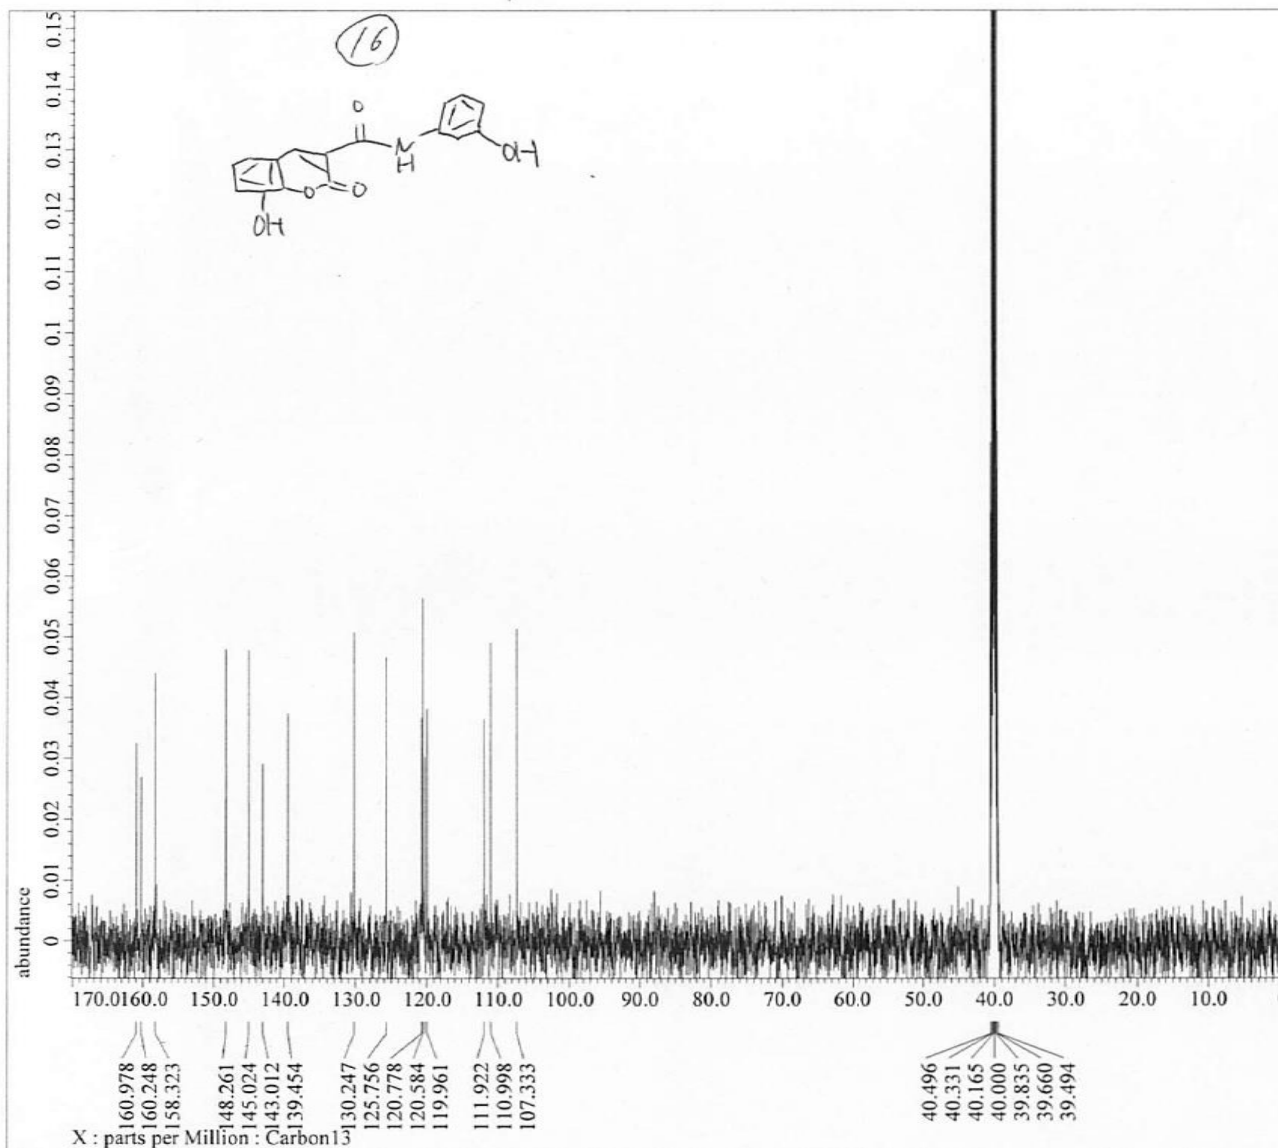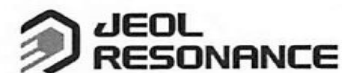

Filename = L1\_ifuku20140124-C01-1-3.j  
 Author = delta  
 Experiment = carbon.jpg  
 Sample\_Id = L1  
 Solvent = DMSO-D6  
 Creation Time = 24-JAN-2014 13:04:56  
 Revision Time = 24-JAN-2014 13:12:30  
 Current Time = 24-JAN-2014 13:13:06

Comment = p. 67-Fr. 5  
 Data Format = 1D COMPLEX  
 Dim Size = 26214  
 Dim Title = Carbon13  
 Dim Units = [ppm]  
 Dimensions = X  
 Site = JNM-ECX500  
 Spectrometer = DELTA2\_NMR

Field Strength = 11.7473579[T] (500[MHz])  
 X\_Acq\_Duration = 0.81788928[s]  
 X\_Domain = 13C  
 X\_Freq = 125.76529768[MHz]  
 X\_Offset = 100[ppm]  
 X\_Points = 32768  
 X\_Prescans = 4  
 X\_Resolution = 1.22265938[Hz]  
 X\_Sweep = 40.06410256[kHz]  
 X\_Sweep\_Clipped = 32.05128205[kHz]  
 Irr\_Domain = Proton  
 Irr\_Freq = 500.15991521[MHz]  
 Irr\_Offset = 5.0[ppm]  
 Clipped = FALSE  
 Scans = 246  
 Total\_Scans = 246

Relaxation\_Delay = 1[s]  
 Recvr\_Gain = 46  
 Temp\_Get = 22.3[dC]  
 X\_90\_Width = 9[us]  
 X\_Acq\_Time = 0.81788928[s]  
 X\_Angle = 30[deg]  
 X\_Atn = 5.7[dB]  
 X\_Pulse = 3[us]  
 Irr\_Atn\_Dec = 21.987[dB]  
 Irr\_Atn\_Noise = 21.987[dB]  
 Irr\_Noise = WALTZ  
 Irr\_Pwidth = 92[us]  
 Decoupling = TRUE  
 Initial\_Wait = 1[s]  
 Noe = TRUE  
 Noe\_Time = 1[s]  
 Repetition\_Time = 1.81788928[s]

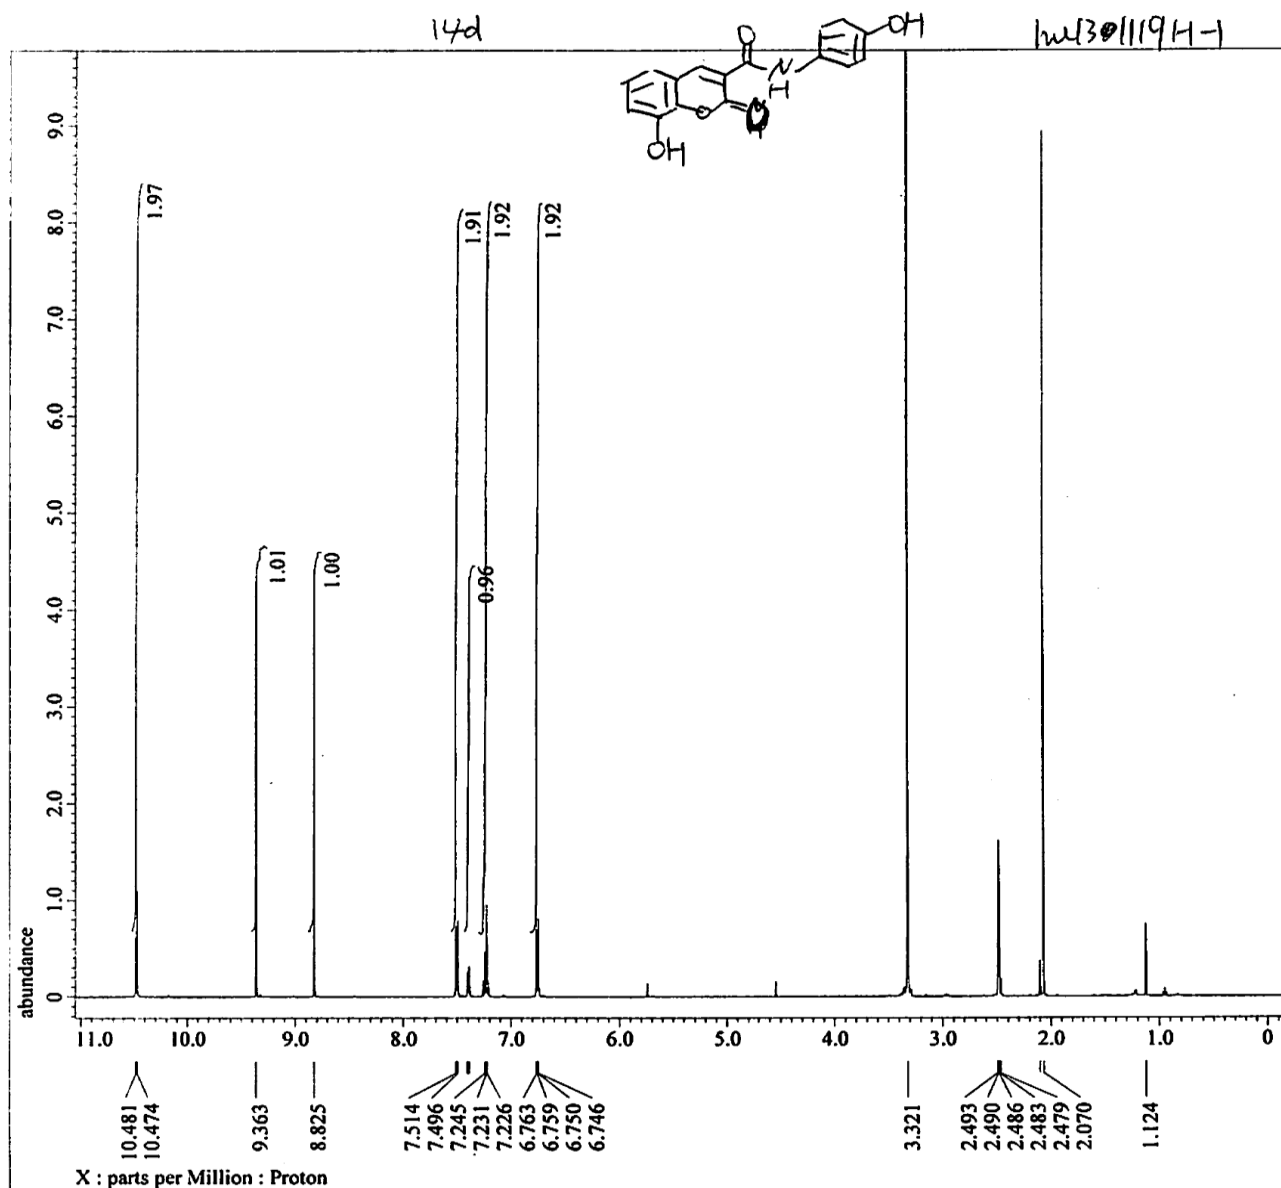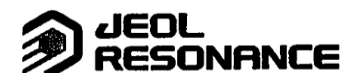

Filename = L1\_hu31119H-1-1-7.jdf  
Author = delta  
Experiment = proton.jxp  
Sample Id = L1  
Solvent = DMSO-D6  
Creation Time = 19-NOV-2013 13:37:29  
Revision Time = 19-NOV-2013 13:41:49  
Current Time = 19-NOV-2013 13:42:08

Comment = 2-p. 43-Fr.22-46  
Data Format = 1D COMPLEX  
Dim Size = 26214  
Dim Title = Proton  
Dim Units = [ppm]  
Dimensions = X  
Site = JNM-ECK500  
Spectrometer = DELTA2\_NMR

Field Strength = 11.7473579[T] (500[MHz])  
X Acq Duration = 3.49175808[s]  
X Domain = 1H  
X Freq = 500.15991521[MHz]  
X Offset = 5.0[ppm]  
X Points = 32768  
X Prescans = 1  
X Resolution = 0.28638868[Hz]  
X Slew = 9.38438438[kHz]  
X Slew Clipped = 7.50750751[kHz]  
Irr Domain = Proton  
Irr Freq = 500.15991521[MHz]  
Irr Offset = 5.0[ppm]  
Tri Domain = Proton  
Tri Freq = 500.15991521[MHz]  
Tri Offset = 5.0[ppm]  
Clipped = FALSE  
Scans = 8  
Total Scans = 8

Relaxation Delay = 5[s]  
Recvr Gain = 50  
Temp Set = 21.2[dC]  
X 90 Width = 11.6[us]  
X Acq Time = 3.49175808[s]  
X Angle = 45[deg]  
X Atn = 4[dB]  
X Pulse = 5.8[us]  
Irr Mode = Off  
Tri Mode = Off  
Dante Presat = FALSE  
Initial Wait = 1[s]  
Repetition Time = 8.49175808[s]

14d

(14)

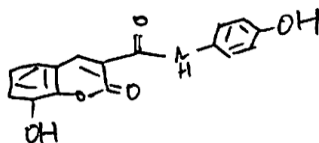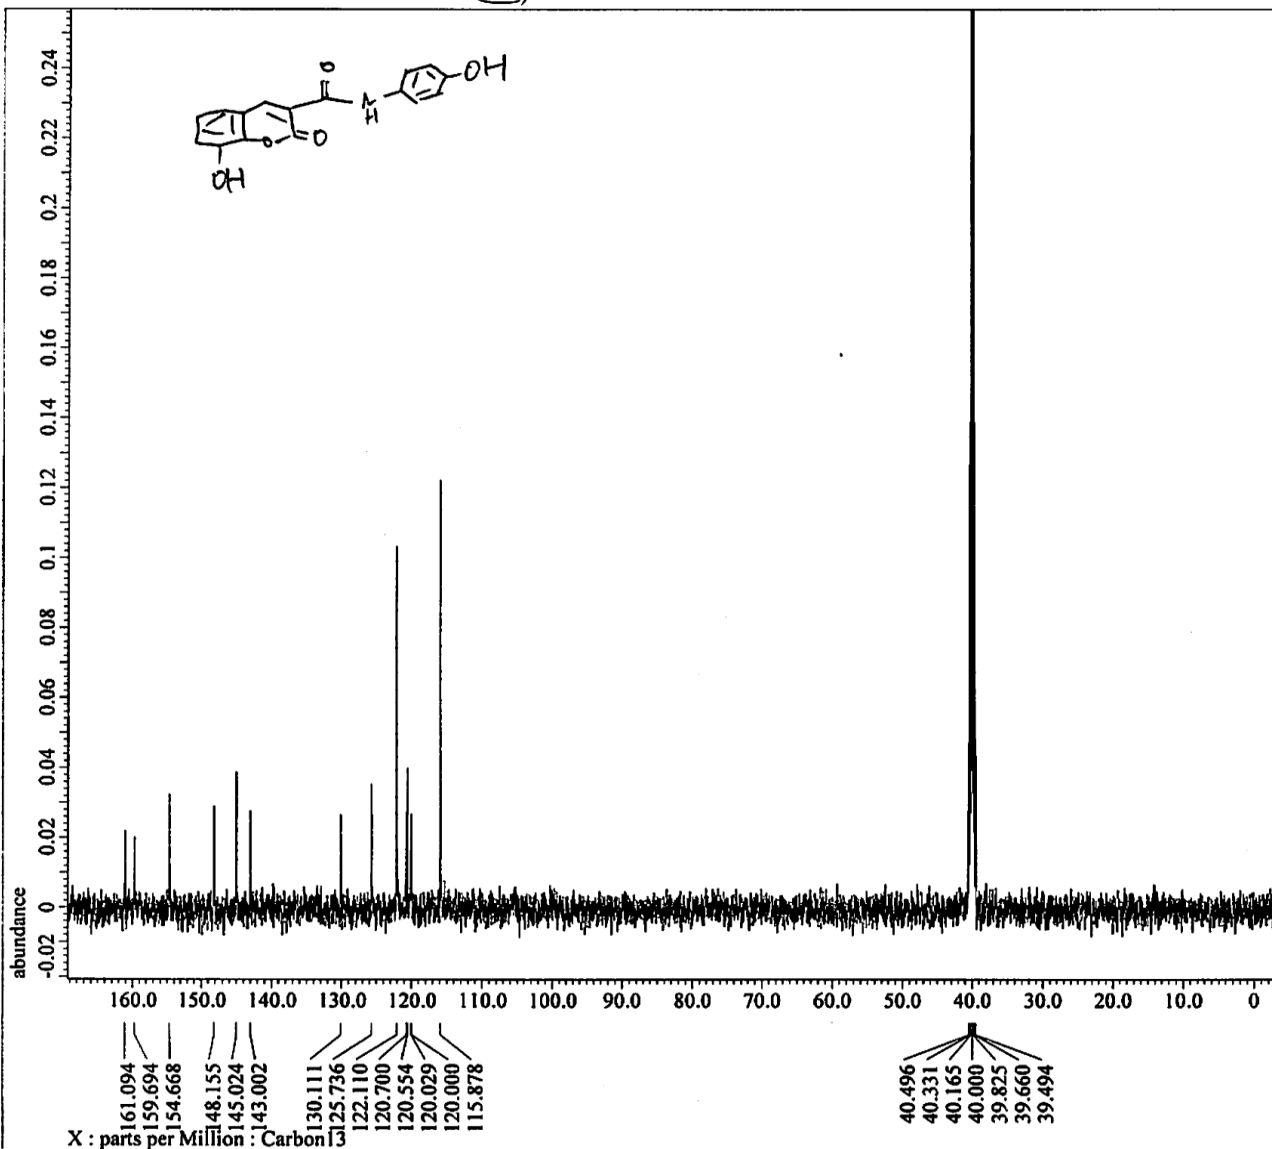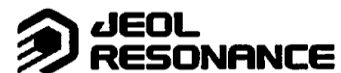

Filename = LI\_ifuku20131225-C03-1-4.j  
 Author = delta  
 Experiment = carbon.jpg  
 Sample Id = LI  
 Solvent = DMSO-D6  
 Creation Time = 25-DEC-2013 15:38:53  
 Revision Time = 25-DEC-2013 15:45:46  
 Current Time = 25-DEC-2013 15:46:08

Data Format = 1D COMPLEX  
 Dim Size = 26214  
 Dim Title = Carbon13  
 Dim Units = [ppm]  
 Dimensions = X  
 Site = JNM-ECX500  
 Spectrometer = DELTA2\_NMR

Field Strength = 11.7473579[T] (500[MHz])  
 X Acq Duration = 0.81788928[s]  
 X Domain = 13C  
 X Freq = 125.76529768[MHz]  
 X Offset = 100[ppm]  
 X Points = 32768  
 X Prescans = 4  
 X Resolution = 1.22265938[Hz]  
 X Sweep = 40.06410256[kHz]  
 X Sweep Clipped = 32.05128205[kHz]  
 Irr Domain = Proton  
 Irr Freq = 500.15991521[MHz]  
 Irr Offset = 5.0[ppm]  
 Clipped = TRUE  
 Scans = 215  
 Total Scans = 215

Relaxation Delay = 1[s]  
 Recvr Gain = 44  
 Temp Get = 22.3[degC]  
 X 90 Width = 9[us]  
 X Acq Time = 0.81788928[s]  
 X Angle = 30[deg]  
 X Atn = 5.7[dB]  
 X Pulse = 3[us]  
 Irr Atn Doc = 21.987[dB]  
 Irr Atn Noe = 21.987[dB]  
 Irr Noise = WALTZ  
 Irr Pwidth = 92[us]  
 Decoupling = TRUE  
 Initial Wait = 1[s]  
 Noe = TRUE  
 Noe Time = 1[s]  
 Repetition Time = 1.81788928[s]



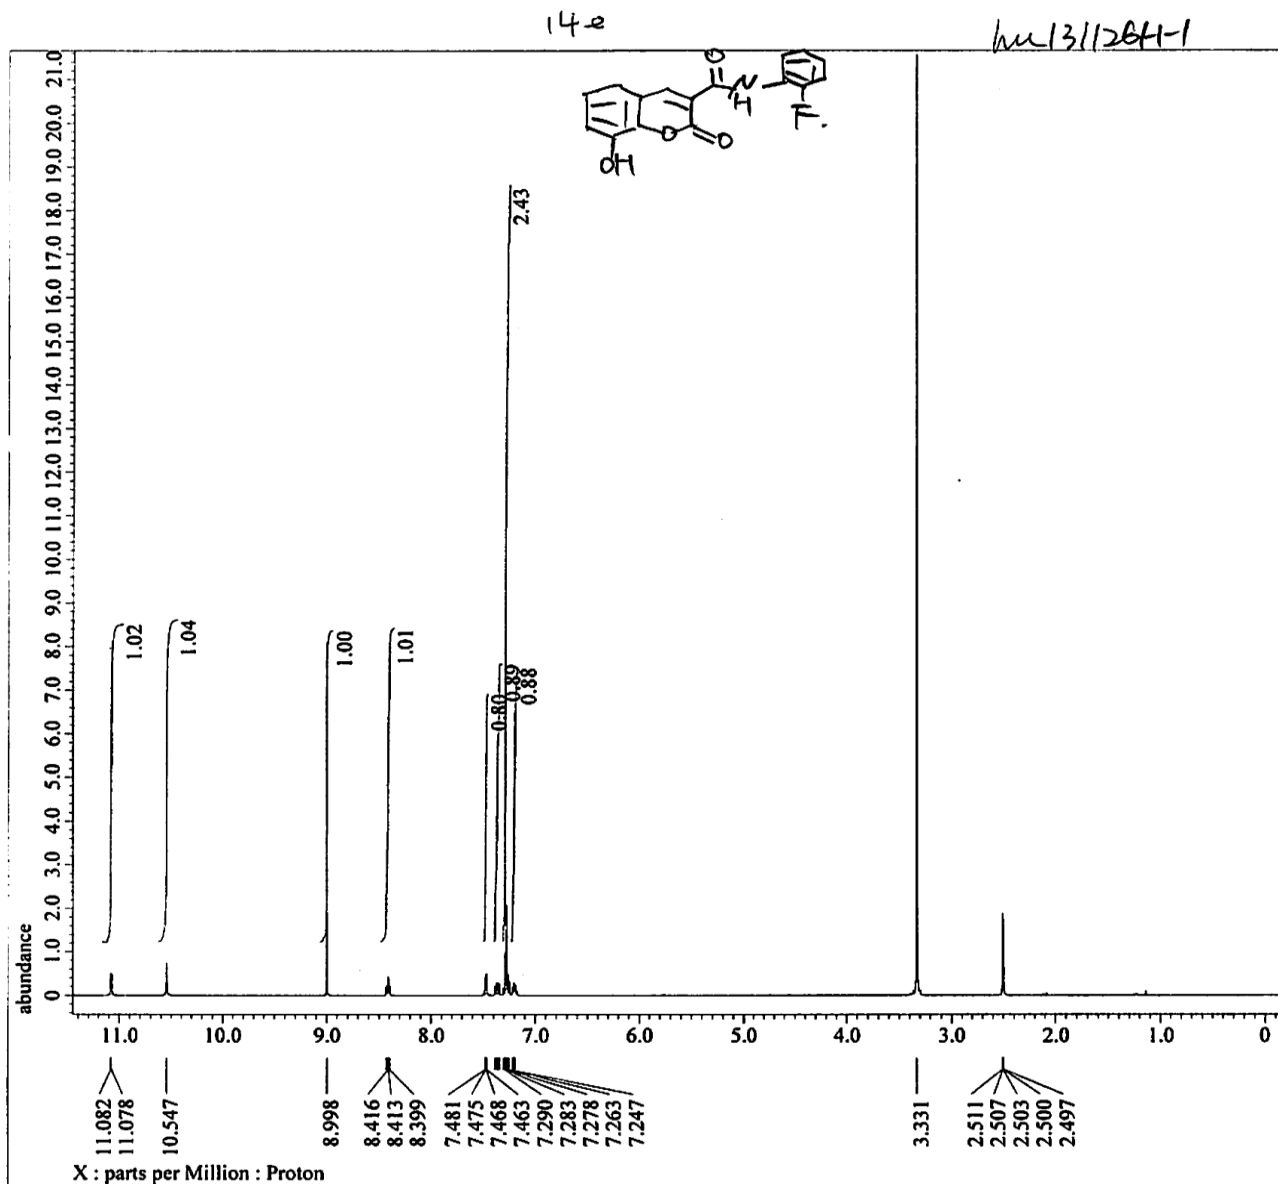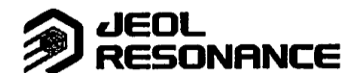

Filename = L1\_hu1311268-1-1-7.jdf  
 Author = doIta  
 Experiment = proton.jxp  
 Sample\_Id = L1  
 Solvent = DMSO-D6  
 Creation\_Time = 26-NOV-2013 16:44:05  
 Revision\_Time = 26-NOV-2013 16:46:49  
 Current\_Time = 26-NOV-2013 16:47:00

Comment = 2-p. 43-Fr. 22-46  
 Data\_Format = 1D COMPLEX  
 Dim\_Size = 26214  
 Dim\_Title = Proton  
 Dim\_Units = [ppm]  
 Dimensions = X  
 Site = JNM-ECK500  
 Spectrometer = DELTA2\_NMR

Field\_Strength = 11.7473579[T] (500[MHz])  
 X\_Acq\_Duration = 3.49175808[s]  
 X\_Domain = 1H  
 X\_Freq = 500.15991521[MHz]  
 X\_Offset = 5.0[ppm]  
 X\_Points = 32768  
 X\_Prescans = 1  
 X\_Resolution = 0.28638868[Hz]  
 X\_Sweep = 9.38438438[kHz]  
 X\_Sweep\_Clipped = 7.50750751[kHz]  
 Irr\_Domain = Proton  
 Irr\_Freq = 500.15991521[MHz]  
 Irr\_Offset = 5.0[ppm]  
 Tri\_Domain = Proton  
 Tri\_Freq = 500.15991521[MHz]  
 Tri\_Offset = 5.0[ppm]  
 Clipped = FALSE  
 Scans = 5  
 Total\_Scans = 5

Relaxation\_Delay = 5[s]  
 Recvr\_Gain = 52  
 Temp\_Get = 22.9[degC]  
 X\_90\_Width = 11.6[us]  
 X\_Acq\_Time = 3.49175808[s]  
 X\_Angle = 45[deg]  
 X\_Atn = 4[deg]  
 X\_Pulse = 5.8[us]  
 Irr\_Mode = Off  
 Tri\_Mode = Off  
 DanTo\_Prosat = FALSE  
 Initial\_Wait = 1[s]  
 Repetition\_Time = 8.49175808[s]

14e

D

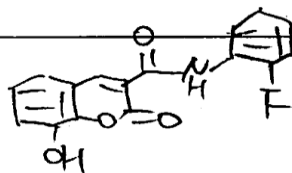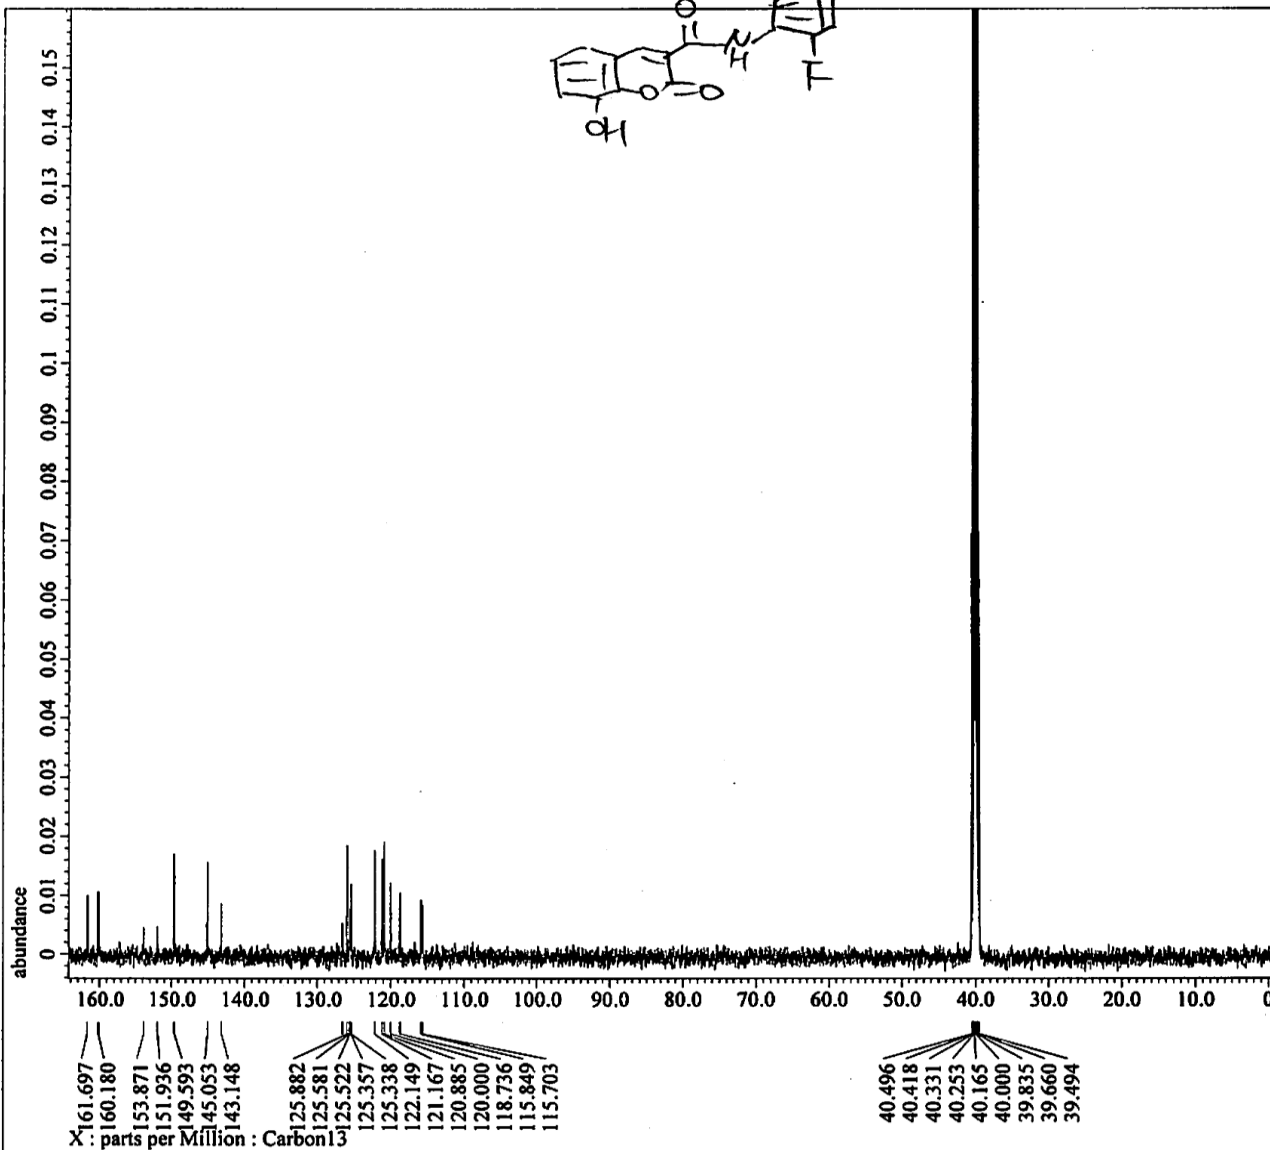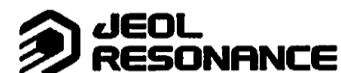

Filename = LI\_hul40205C-5-1-4.jdf  
 Author = delta  
 Experiment = carbon.jsp  
 Sample\_Id = LI  
 Solvent = DMSO-D6  
 Creation\_Time = 5-FEB-2014 21:07:02  
 Revision\_Time = 5-FEB-2014 22:58:18  
 Current\_Time = 5-FEB-2014 22:59:28

Comment = p. 67-Fr. 5  
 Data\_Format = 1D COMPLEX  
 Dim\_Size = 26214  
 Dim\_Title = Carbon13  
 Dim\_Units = [ppm]  
 Dimensions = X  
 Site = JNM-ECX500  
 Spectrometer = DELTA2\_NMR

Field\_Strength = 11.7473579[T] (500[MHz])  
 X\_Acq\_Duration = 0.81788928[s]  
 X\_Domain = 13C  
 X\_Freq = 125.76529768[MHz]  
 X\_Offset = 100[ppm]  
 X\_Points = 32768  
 X\_Proscans = 4  
 X\_Resolution = 1.22265938[Hz]  
 X\_Sweep = 40.06410256[kHz]  
 X\_Sweep\_Clipped = 32.05128205[kHz]  
 Irr\_Domain = Proton  
 Irr\_Freq = 500.15991521[MHz]  
 Irr\_Offset = 5.0[ppm]  
 Clipped = TRUE  
 Scans = 3600  
 Total\_Scans = 3600

Relaxation\_Delay = 1[s]  
 Recvr\_Gain = 46  
 Temp\_Get = 22.3[degC]  
 X\_90\_Width = 9[us]  
 X\_Acq\_Time = 0.81788928[s]  
 X\_Angle = 30[deg]  
 X\_Atn = 5.7[dB]  
 X\_Pulse = 3[us]  
 Irr\_Atn\_Dec = 21.987[dB]  
 Irr\_Atn\_Noise = 21.987[dB]  
 Irr\_Noise = WALTZ  
 Irr\_Pwidth = 92[us]  
 Decoupling = TRUE  
 Initial\_Wait = 1[s]  
 Noe = TRUE  
 Noe\_Time = 1[s]  
 Repetition\_Time = 1.81788928[s]

14f

D

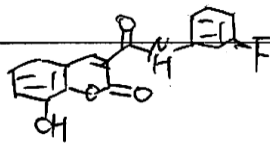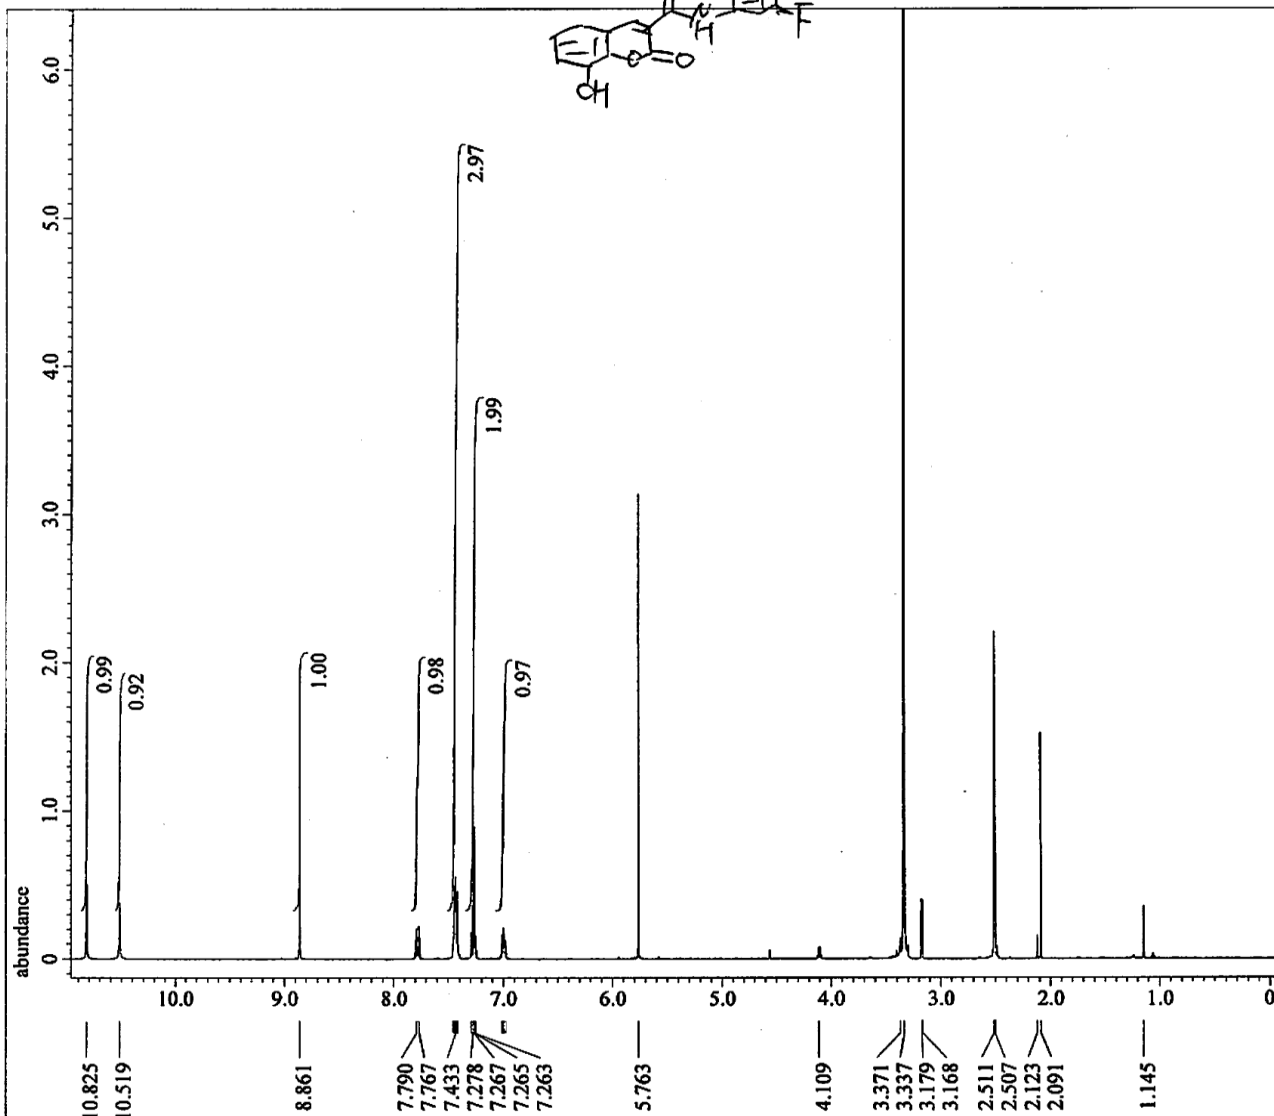

X : parts per Million : Proton

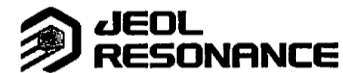

Filename = Li\_hul31122H-2-1-5.jdf  
 Author = delta  
 Experiment = proton.jsp  
 Sample\_Id = L1  
 Solvent = DMSO-D6  
 Creation Time = 22-NOV-2013 14:50:22  
 Revision Time = 22-NOV-2013 14:52:47  
 Current Time = 22-NOV-2013 14:52:55

Data Format = 1D\_COMPLEX  
 Dim\_Size = 26214  
 Dim\_Title = Proton  
 Dim\_Units = [ppm]  
 Dimensions = X  
 Site = JNM-ECX500  
 Spectrometer = DELTA2\_NMR

Field Strength = 11.7473579 [T] (500 [MHz])  
 K\_Acq\_Duration = 3.49175808 [s]  
 K\_Domain = 1H  
 K\_Freq = 500.15991521 [MHz]  
 K\_Offset = 5.0 [ppm]  
 K\_Points = 32768  
 K\_Prescans = 1  
 K\_Resolution = 0.28638868 [Hz]  
 K\_Sweep = 9.38438438 [kHz]  
 K\_Sweep\_Clipped = 7.50750751 [kHz]  
 Irr\_Domain = Proton  
 Irr\_Freq = 500.15991521 [MHz]  
 Irr\_Offset = 5.0 [ppm]  
 Tri\_Domain = Proton  
 Tri\_Freq = 500.15991521 [MHz]  
 Tri\_Offset = 5.0 [ppm]  
 Clipped = FALSE  
 Scans = 8  
 Total\_Scans = 8

Relaxation\_Delay = 5 [s]  
 Recvr\_Gain = 52  
 Temp\_Get = 22.3 [dC]  
 X\_90\_Width = 11.6 [us]  
 X\_Acq\_Time = 3.49175808 [s]  
 X\_Angle = 45 [deg]  
 X\_Atn = 4 [dB]  
 X\_Pulse = 5.8 [us]  
 Irr\_Mode = Off  
 Tri\_Mode = Off  
 Danto\_Presat = FALSE  
 Initial\_Wait = 1 [s]  
 Repetition\_Time = 8.49175808 [s]

14f

0

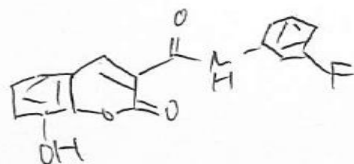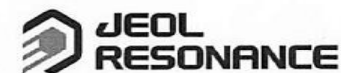

Filename = L1\_ifuku20140124-C02-1-3.j  
 Author = delta  
 Experiment = carbon.jpg  
 Sample Id = L1  
 Solvent = DMSO-D6  
 Creation Time = 24-JAN-2014 15:07:20  
 Revision Time = 24-JAN-2014 15:17:34  
 Current Time = 24-JAN-2014 15:18:31

Comment = p.67-Fr. 5  
 Data Format = 1D COMPLEX  
 Dim Size = 26214  
 Dim Title = Carbon13  
 Dim Units = [ppm]  
 Dimensions = X  
 Site = JNM-ECX500  
 Spectrometer = DELTA2\_NMR

Field Strength = 11.7473579[T] (500[MHz])  
 X\_Acq\_Duration = 0.81788928[s]  
 X\_Domain = 13C  
 X\_Freq = 125.76529768[MHz]  
 X\_Offset = 100[ppm]  
 X\_Points = 32768  
 X\_Prescans = 4  
 X\_Resolution = 1.22265938[Hz]  
 X\_Sweep = 40.06410256[kHz]  
 X\_Sweep\_Clipped = 32.05128205[kHz]  
 Irr\_Domain = Proton  
 Irr\_Freq = 500.15991521[MHz]  
 Irr\_Offset = 5.0[ppm]  
 Clipped = FALSE  
 Scans = 343  
 Total\_Scans = 343

Relaxation\_Delay = 1[s]  
 Recvr\_Gain = 46  
 Temp\_Get = 22.3[dC]  
 X\_90\_Width = 9[us]  
 X\_Acq\_Time = 0.81788928[s]  
 X\_Angle = 30[deg]  
 X\_Atn = 5.7[dB]  
 X\_Pulse = 3[us]  
 Irr\_Atn\_Dec = 21.987[dB]  
 Irr\_Atn\_Noe = 21.987[dB]  
 Irr\_Noise = WALTZ  
 Irr\_Pwidth = 92[us]  
 Decoupling = TRUE  
 Initial\_Wait = 1[s]  
 Noe = TRUE  
 Noe\_Time = 1[s]  
 Repetition\_Time = 1.81788928[s]

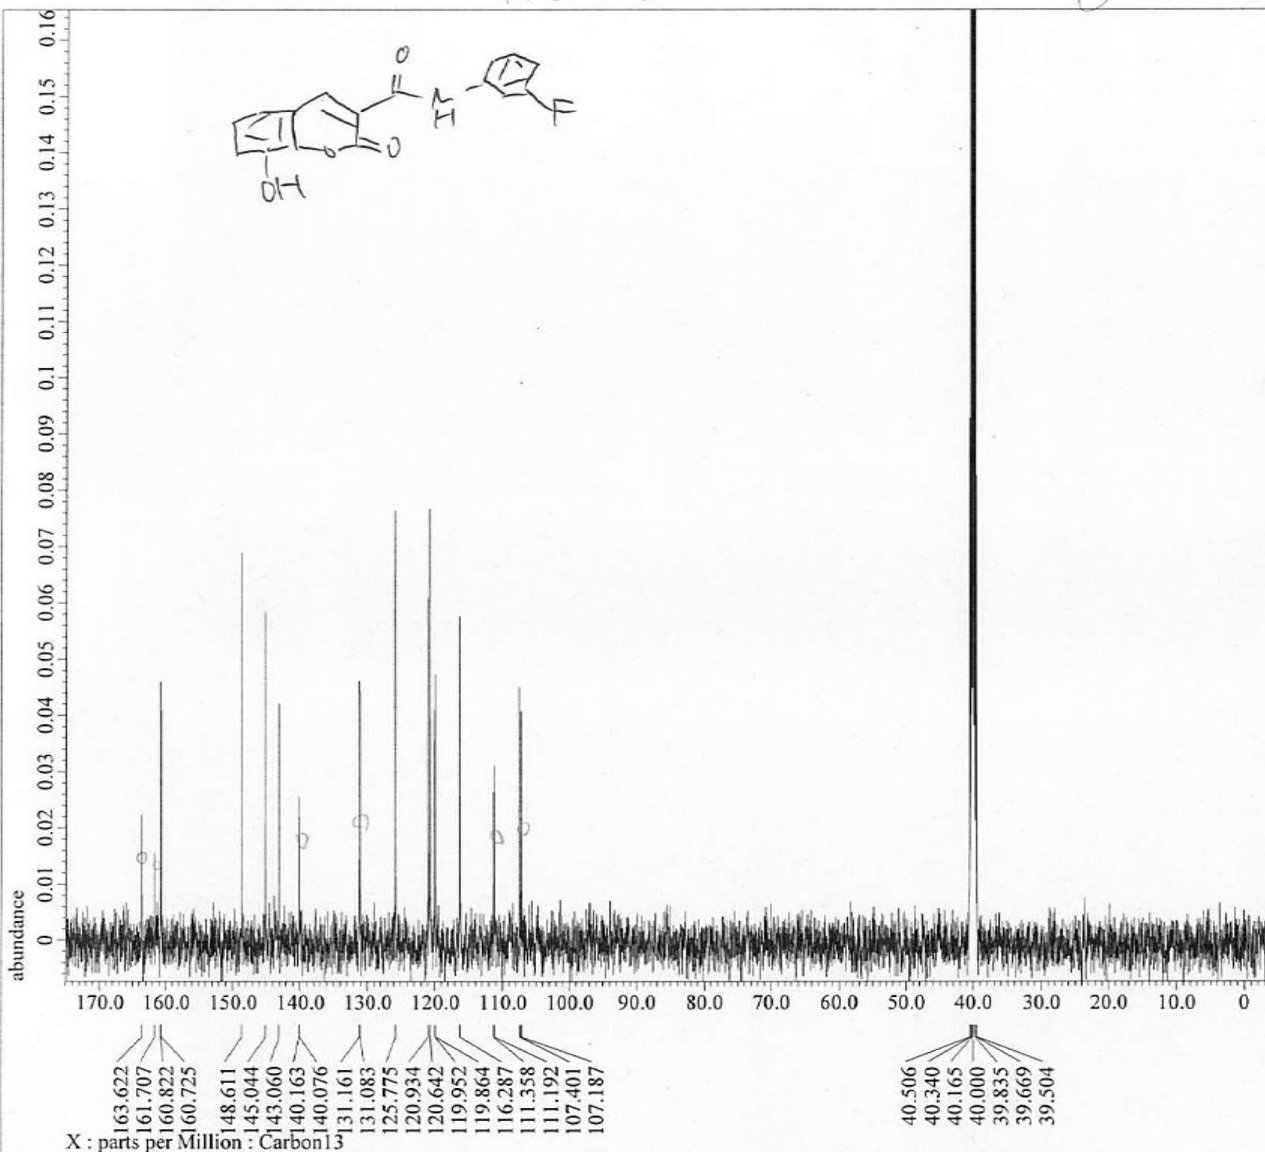

134 148 D

CBR-2

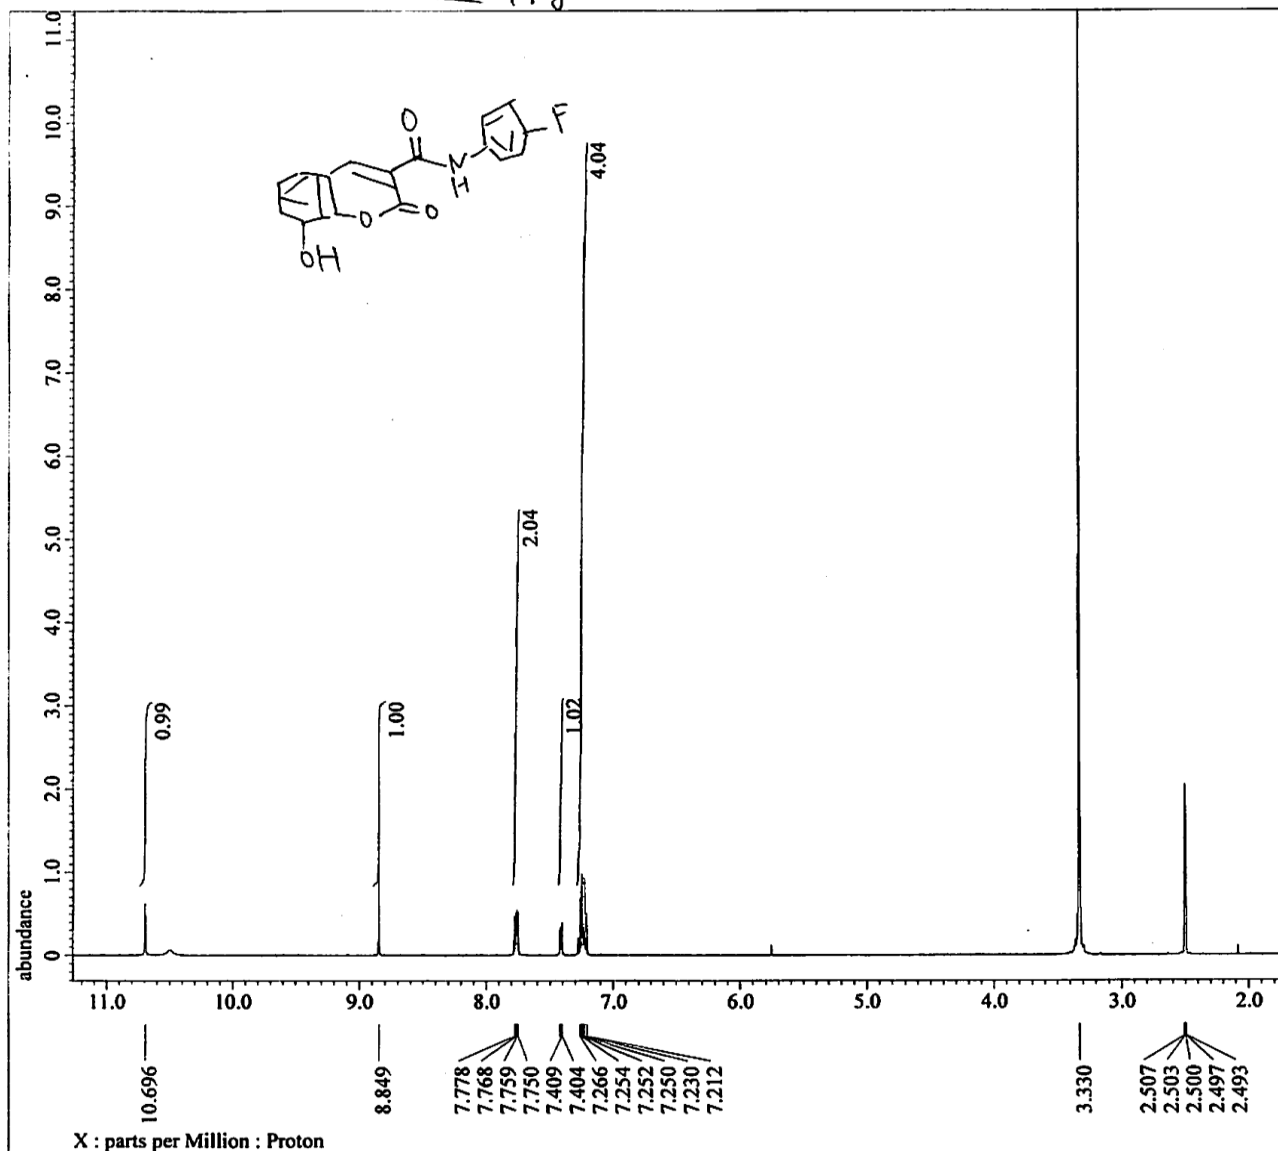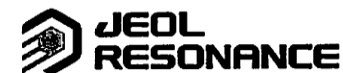

|                  |                              |
|------------------|------------------------------|
| Filename         | = L1 ifuku20131122-h01-1-4.j |
| Author           | = delta                      |
| Experiment       | = proton.jsp                 |
| Sample Id        | = L1                         |
| Solvent          | = DMSO-D6                    |
| Creation Time    | = 22-NOV-2013 14:37:02       |
| Revision Time    | = 22-NOV-2013 14:40:26       |
| Current Time     | = 22-NOV-2013 14:40:37       |
| Data Format      | = 1D COMPLEX                 |
| Dim Size         | = 26214                      |
| Dim Title        | = Proton                     |
| Dim Units        | = [ppm]                      |
| Dimensions       | = X                          |
| Site             | = JNM-ECS500                 |
| Spectrometer     | = DELTA2_NMR                 |
| Field Strength   | = 11.7473579[T] (500[MHz])   |
| X Acq Duration   | = 3.49175808[s]              |
| X Domain         | = 1H                         |
| X Freq           | = 500.15991521[MHz]          |
| X Offset         | = 5.0[ppm]                   |
| X Points         | = 32768                      |
| X Prescans       | = 1                          |
| X Resolution     | = 0.28638868[Hz]             |
| X Sloop          | = 9.38438438[kHz]            |
| X Sloop Clipped  | = 7.50750751[kHz]            |
| Irr Domain       | = Proton                     |
| Irr Freq         | = 500.15991521[MHz]          |
| Irr Offset       | = 5.0[ppm]                   |
| Tri Domain       | = Proton                     |
| Tri Freq         | = 500.15991521[MHz]          |
| Tri Offset       | = 5.0[ppm]                   |
| Clipped          | = FALSE                      |
| Scans            | = 4                          |
| Total Scans      | = 4                          |
| Relaxation Delay | = 5[s]                       |
| Recvr Gain       | = 52                         |
| Temp Get         | = 22.1[degC]                 |
| X 90 Width       | = 11.6[us]                   |
| X Acq Time       | = 3.49175808[s]              |
| X Angle          | = 45[deg]                    |
| X Atn            | = 4[dB]                      |
| X Pulse          | = 5.8[us]                    |
| Irr Mode         | = Off                        |
| Tri Mode         | = Off                        |
| Danto Presat     | = FALSE                      |
| Initial Wait     | = 1[s]                       |
| Repetition Time  | = 8.49175808[s]              |

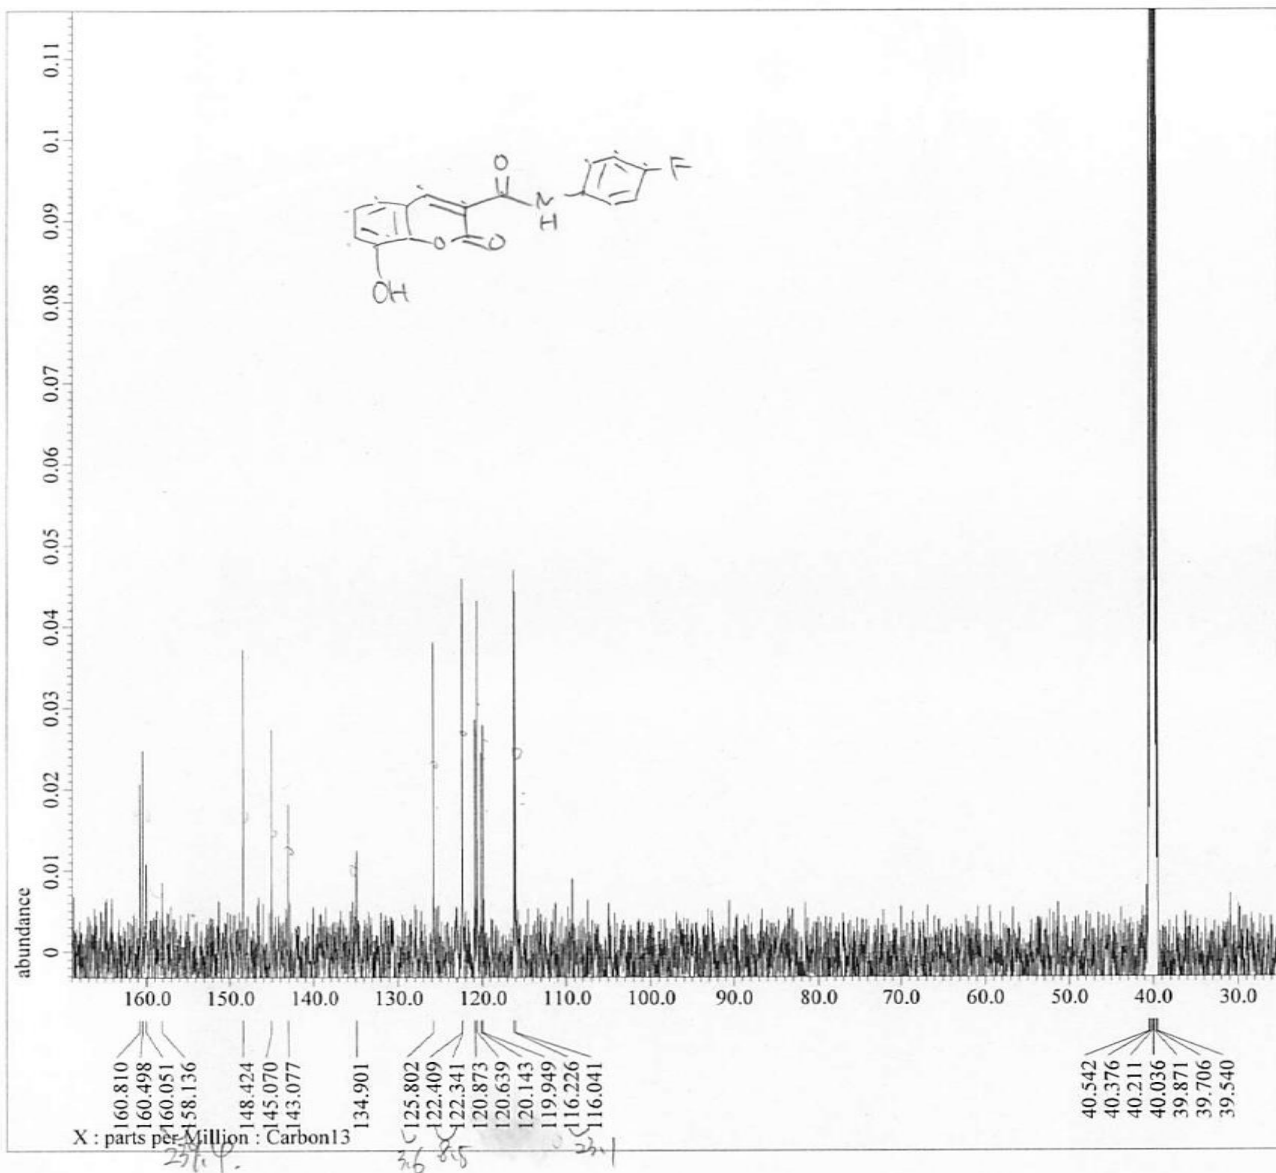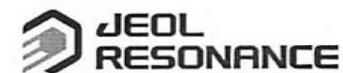

Filename = L1\_ifuku20131122-C01\_copy2  
 Author = delta  
 Experiment = carbon.jxp  
 Sample\_Id = L1  
 Solvent = DMSO-D6  
 Creation\_Time = 22-NOV-2013 15:35:51  
 Revision\_Time = 22-NOV-2013 15:52:53  
 Current\_Time = 22-NOV-2013 15:53:34

Data\_Format = 1D\_COMPLEX  
 Dim\_Size = 26214  
 Dim\_Title = Carbon13  
 Dim\_Units = [ppm]  
 Dimensions = X  
 Site = JNM-ECX500  
 Spectrometer = DELTA2\_NMR

Field\_Strength = 11.7473579[T] (500[MHz])  
 X\_Acq\_Duration = 0[s]  
 X\_Domain = 13C  
 X\_Freq = 125.76529768[MHz]  
 X\_Offset = 100[ppm]  
 X\_Points = 32768  
 X\_Prescans = 4  
 X\_Resolution = 1.22265938[Hz]  
 X\_Sweep = 40.06410256[kHz]  
 X\_Sweep\_Clipped = 32.05128205[kHz]  
 Irr\_Domain = Proton  
 Irr\_Freq = 500.15991521[MHz]  
 Irr\_Offset = 5.0[ppm]  
 Clipped = TRUE  
 Incomplete\_Copy = TRUE  
 Scans = 356  
 Total\_Scans = 356

Relaxation\_Delay = 2[s]  
 Recvr\_Gain = 46  
 Temp\_Get = 22.6[dC]  
 X\_90\_Width = 9[us]  
 X\_Acq\_Time = 0.81788928[s]  
 X\_Angle = 30[deg]  
 X\_Atn = 5.7[dB]  
 X\_Pulse = 3[us]  
 Irr\_Atn\_Dec = 21.987[dB]  
 Irr\_Atn\_Noe = 21.987[dB]  
 Irr\_Noise = WALTZ  
 Irr\_Pwidth = 92[us]  
 Decoupling = TRUE  
 Initial\_Wait = 1[s]  
 Noe = TRUE  
 Noe\_Time = 2[s]  
 Repetition\_Time = 2.81788928[s]

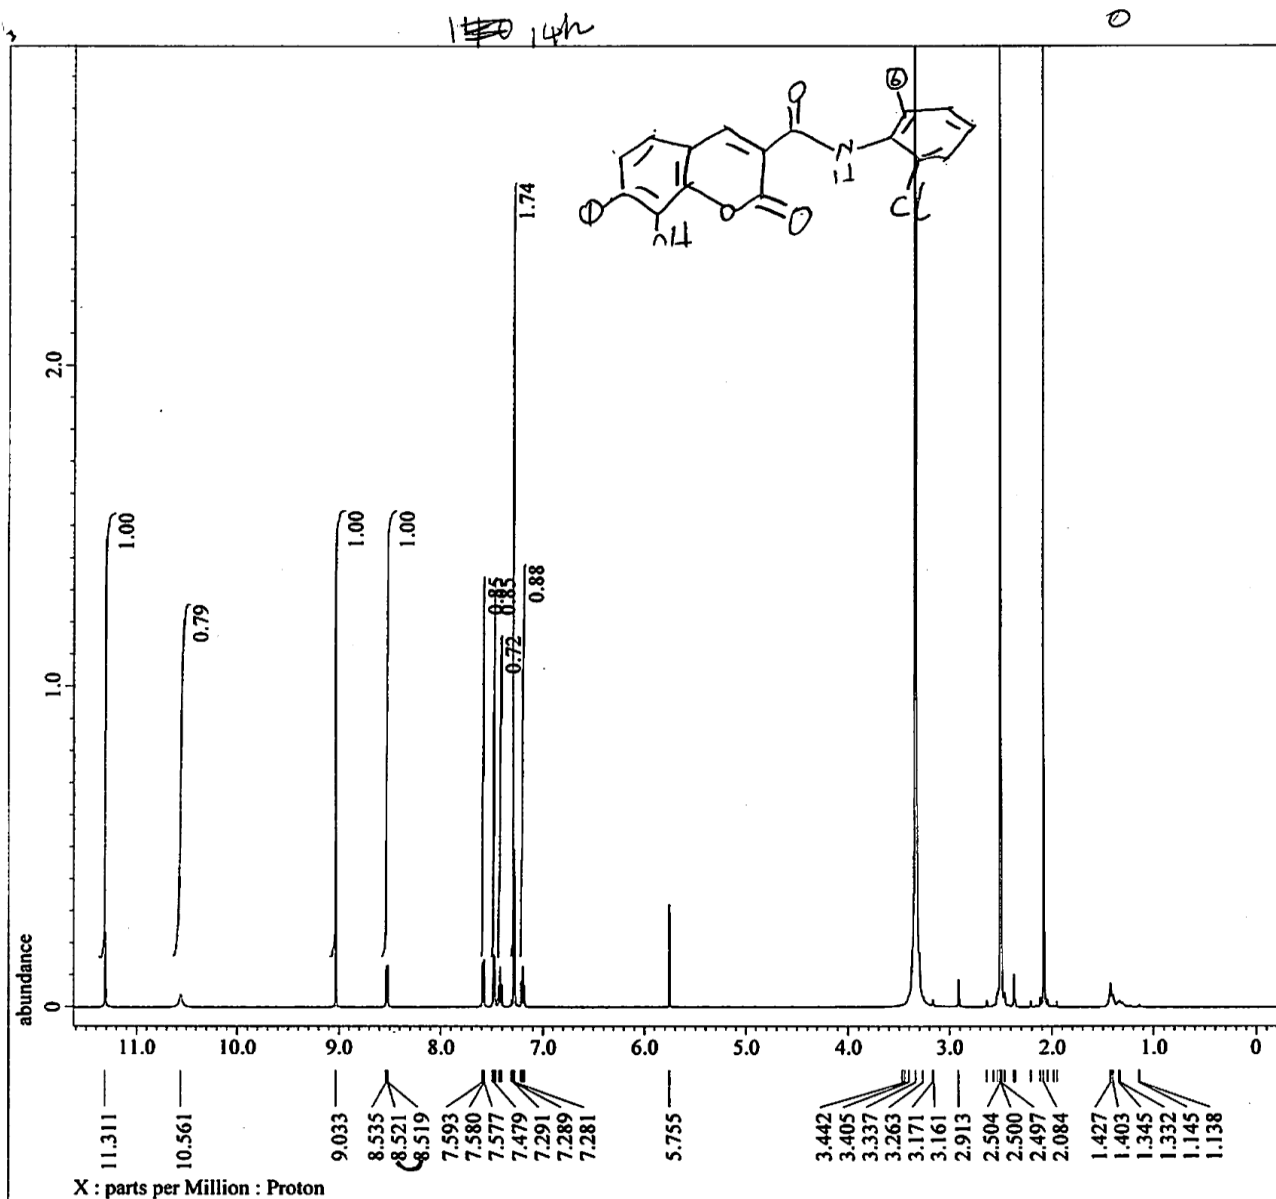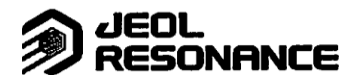

Filename = L1\_hu140319H-3-1-4.jdf  
 Author = delta  
 Experiment = proton.jpg  
 Sample Id = L1  
 Solvent = DMSO-D6  
 Creation Time = 19-MAR-2014 13:52:20  
 Revision Time = 19-MAR-2014 13:54:08  
 Current Time = 19-MAR-2014 13:54:37  
 Data Format = 1D COMPLEX  
 Dim Size = 26214  
 Dim Title = Proton  
 Dim Units = (ppm)  
 Dimensions = X  
 Site = JNM-ECS500  
 Spectrometer = DELTA2\_NMR  
 Field Strength = 11.7473579[T] (500[MHz])  
 X\_Acq\_Duration = 3.49175808[s]  
 X\_Domain = 1H  
 X\_Freq = 500.15991521[MHz]  
 X\_Offset = 5.0[ppm]  
 X\_Points = 32768  
 X\_Prescans = 1  
 X\_Resolution = 0.28638868[Hz]  
 X\_Sweep = 9.38438438[kHz]  
 X\_Sweep\_Clipped = 7.50750751[kHz]  
 Irr\_Domain = Proton  
 Irr\_Freq = 500.15991521[MHz]  
 Irr\_Offset = 5.0[ppm]  
 Tri\_Domain = Proton  
 Tri\_Freq = 500.15991521[MHz]  
 Tri\_Offset = 5.0[ppm]  
 Clipped = FALSE  
 Scans = 8  
 Total\_Scans = 8  
 Relaxation\_Delay = 5[s]  
 Recvr\_Gain = 46  
 Temp\_Got = 22.4[dC]  
 X\_90\_Width = 11.6[us]  
 X\_Acq\_Time = 3.49175808[s]  
 X\_Angle = 45[deg]  
 X\_Atn = 4[deg]  
 X\_Pulse = 5.8[us]  
 Irr\_Mode = Off  
 Tri\_Mode = Off  
 Dante\_Present = FALSE  
 Initial\_Wait = 1[s]  
 Repetition\_Time = 8.49175808[s]

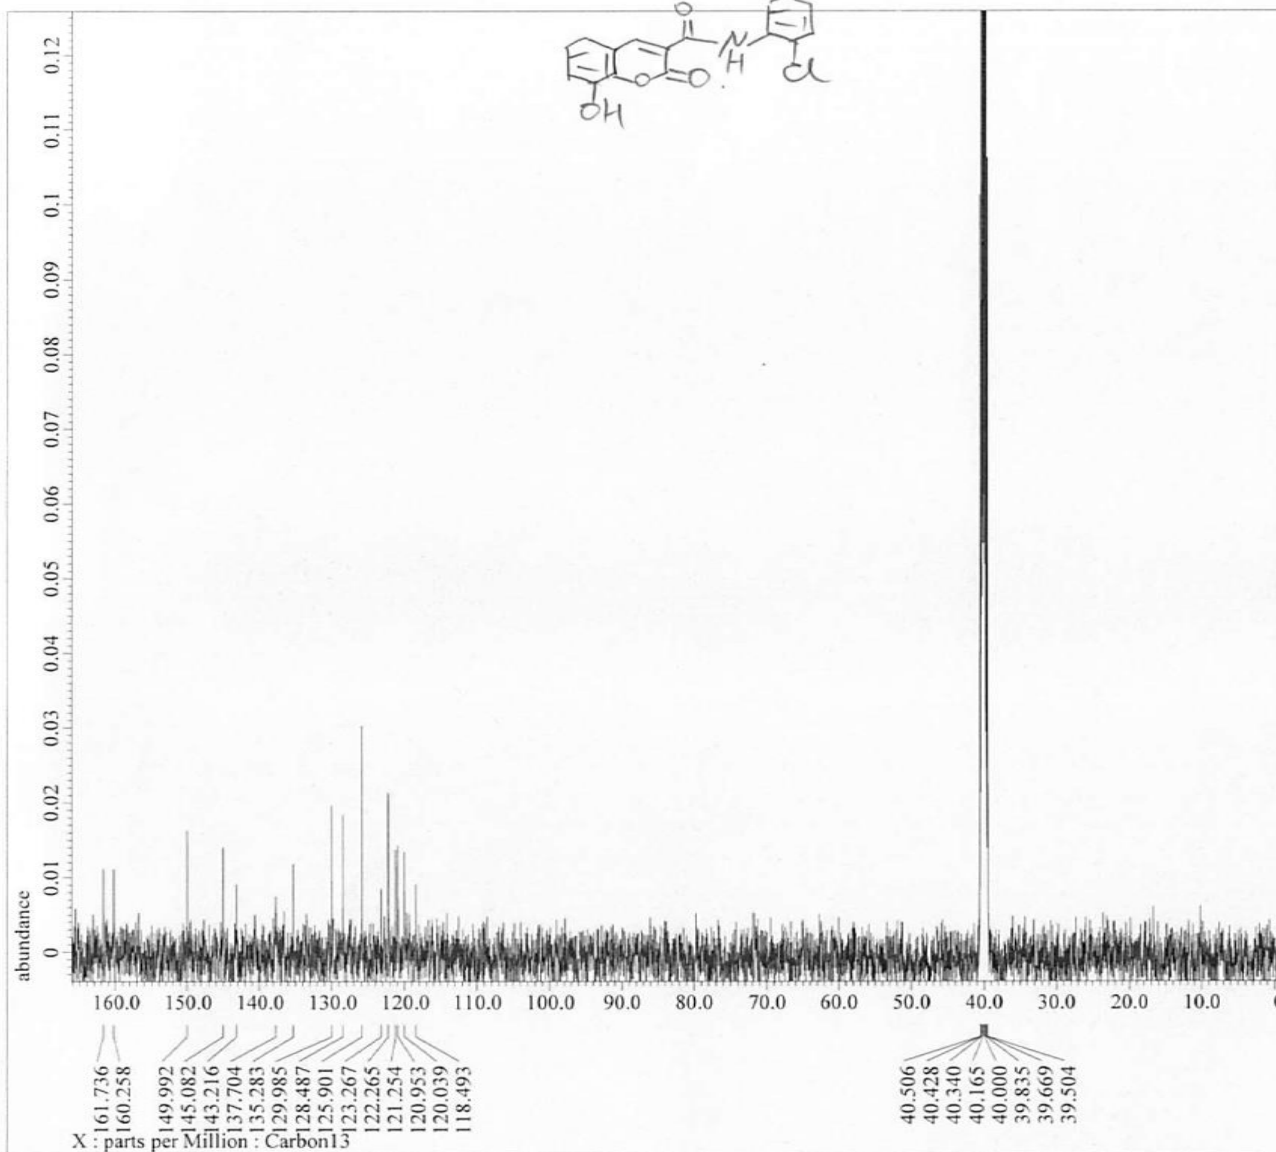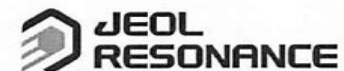

Filename = L1\_hul40407C-3-1-5.jdf  
 Author = delta  
 Experiment = carbon.jxp  
 Sample\_Id = L1  
 Solvent = DMSO-D6  
 Creation\_Time = 7-APR-2014 15:04:59  
 Revision\_Time = 7-APR-2014 15:27:47  
 Current\_Time = 7-APR-2014 15:28:07  
  
 Data\_Format = 1D COMPLEX  
 Dim\_Size = 26214  
 Dim\_Title = Carbon13  
 Dim\_Units = [ppm]  
 Dimensions = X  
 Site = JNM-ECX500  
 Spectrometer = DELTA2\_NMR  
  
 Field\_Strength = 11.7473579[T] (500[MHz])  
 X\_Acq\_Duration = 0.81788928[s]  
 X\_Domain = 13C  
 X\_Freq = 125.76529768[MHz]  
 X\_Offset = 100[ppm]  
 X\_Points = 32768  
 X\_Prescans = 4  
 X\_Resolution = 1.22265938[Hz]  
 X\_Sweep = 40.06410256[kHz]  
 X\_Sweep\_Clipped = 32.05128205[kHz]  
 Irr\_Domain = Proton  
 Irr\_Freq = 500.15991521[MHz]  
 Irr\_Offset = 5.0[ppm]  
 Clipped = FALSE  
 Scans = 467  
 Total\_Scans = 467  
  
 Relaxation\_Delay = 2[s]  
 Recvr\_Gain = 46  
 Temp\_Get = 22.1[dC]  
 X\_90\_Width = 9[us]  
 X\_Acq\_Time = 0.81788928[s]  
 X\_Angle = 30[deg]  
 X\_Atn = 5.7[dB]  
 X\_Pulse = 3[us]  
 Irr\_Atn\_Dec = 21.987[dB]  
 Irr\_Atn\_Noe = 21.987[dB]  
 Irr\_Noise = WALTZ  
 Irr\_Pwidth = 92[us]  
 Decoupling = TRUE  
 Initial\_Wait = 1[s]  
 Noe = TRUE  
 Noe\_Time = 2[s]  
 Repetition\_Time = 2.81788928[s]



141

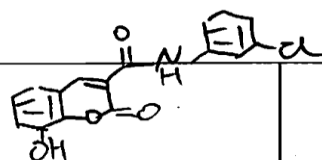

hw/3/227H-1

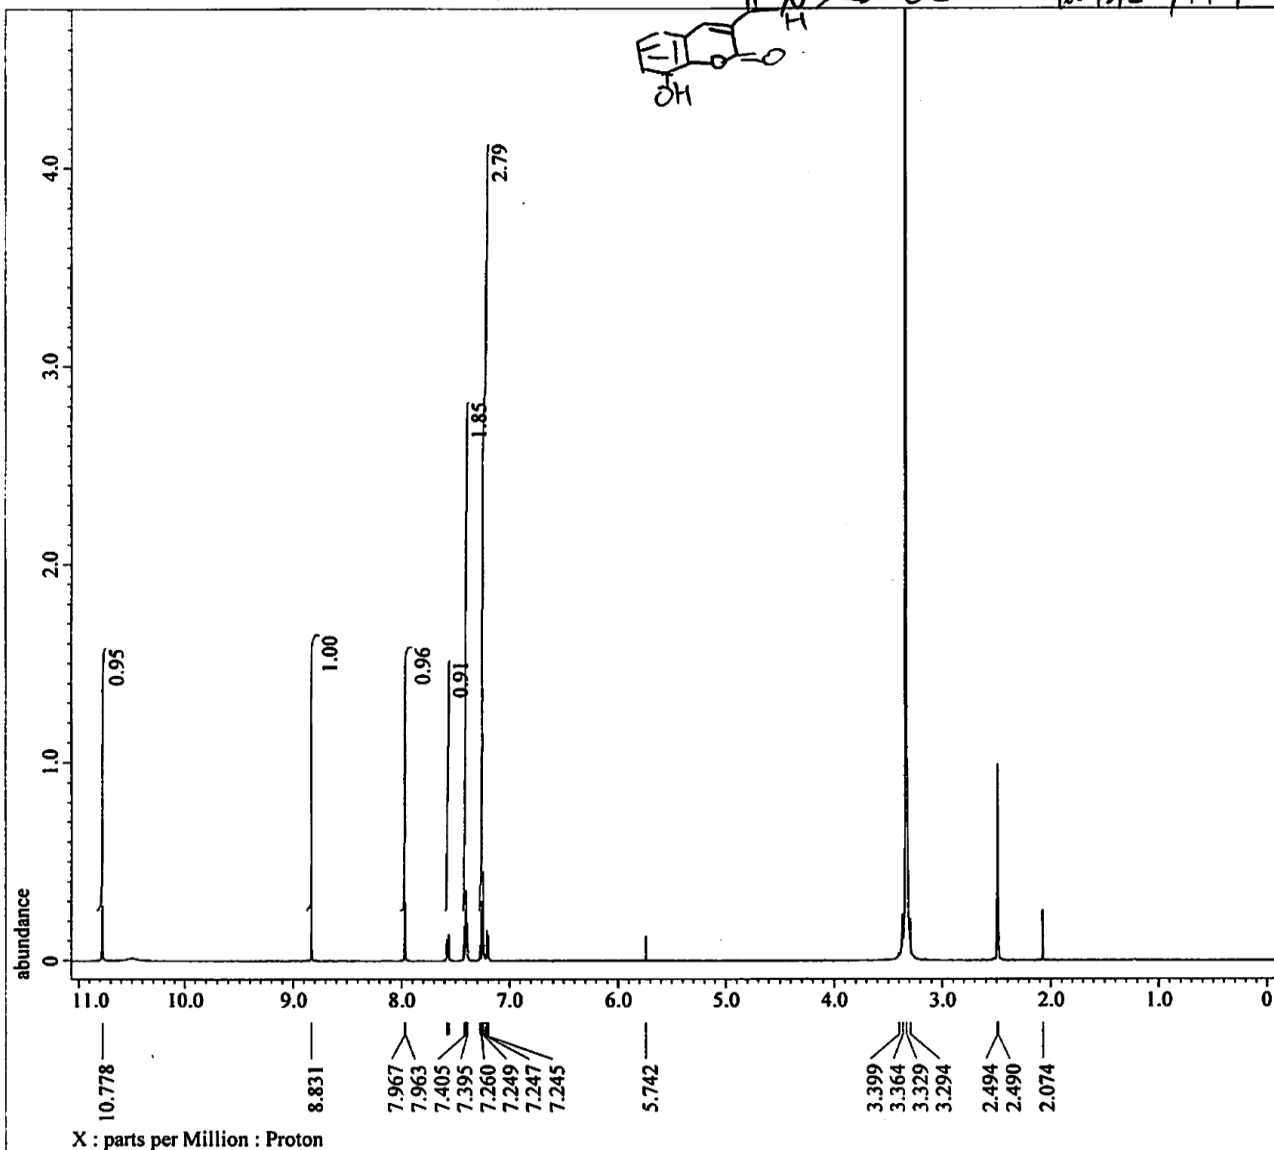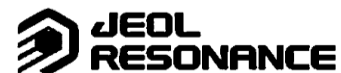

Filename = L1\_hu131227H-1-1-4.jdf  
 Author = delta  
 Experiment = proton.jpg  
 Sample Id = L1  
 Solvent = DMSO-D6  
 Creation Time = 27-DEC-2013 12:05:07  
 Revision Time = 27-DEC-2013 12:07:30  
 Current Time = 27-DEC-2013 12:07:58

Data Format = 1D COMPLEX  
 Dim Size = 26214  
 Dim Title = Proton  
 Dim Units = [ppm]  
 Dimensions = X  
 Site = JNM-ECX500  
 Spectrometer = DELTA2 NMR

Field Strength = 11.7473579 [T] (500 [MHz])  
 X Acq Duration = 3.49175808 [s]  
 X Domain = 18  
 X Freq = 500.15991521 [MHz]  
 X Offset = 5.0 [ppm]  
 X Points = 32768  
 X Prescans = 1  
 X Resolution = 0.28638868 [Hz]  
 X Sweep = 9.38438438 [kHz]  
 X Sweep Clipped = 7.50750751 [kHz]  
 Irr Domain = Proton  
 Irr Freq = 500.15991521 [MHz]  
 Irr Offset = 5.0 [ppm]  
 Tri Domain = Proton  
 Tri Freq = 500.15991521 [MHz]  
 Tri Offset = 5.0 [ppm]  
 Clipped = FALSE  
 Scans = 8  
 Total Scans = 8

Relaxation Delay = 5 [s]  
 Recvr Gain = 46  
 Temp Get = 23.4 [dC]  
 X 90 Width = 11.6 [us]  
 X Acq Time = 3.49175808 [s]  
 X Angle = 45 [deg]  
 X Atn = 4 [dB]  
 X Pulse = 5.8 [us]  
 Irr Mode = Off  
 Tri Mode = Off  
 Dante Presat = FALSE  
 Initial Wait = 1 [s]  
 Repetition Time = 8.49175808 [s]

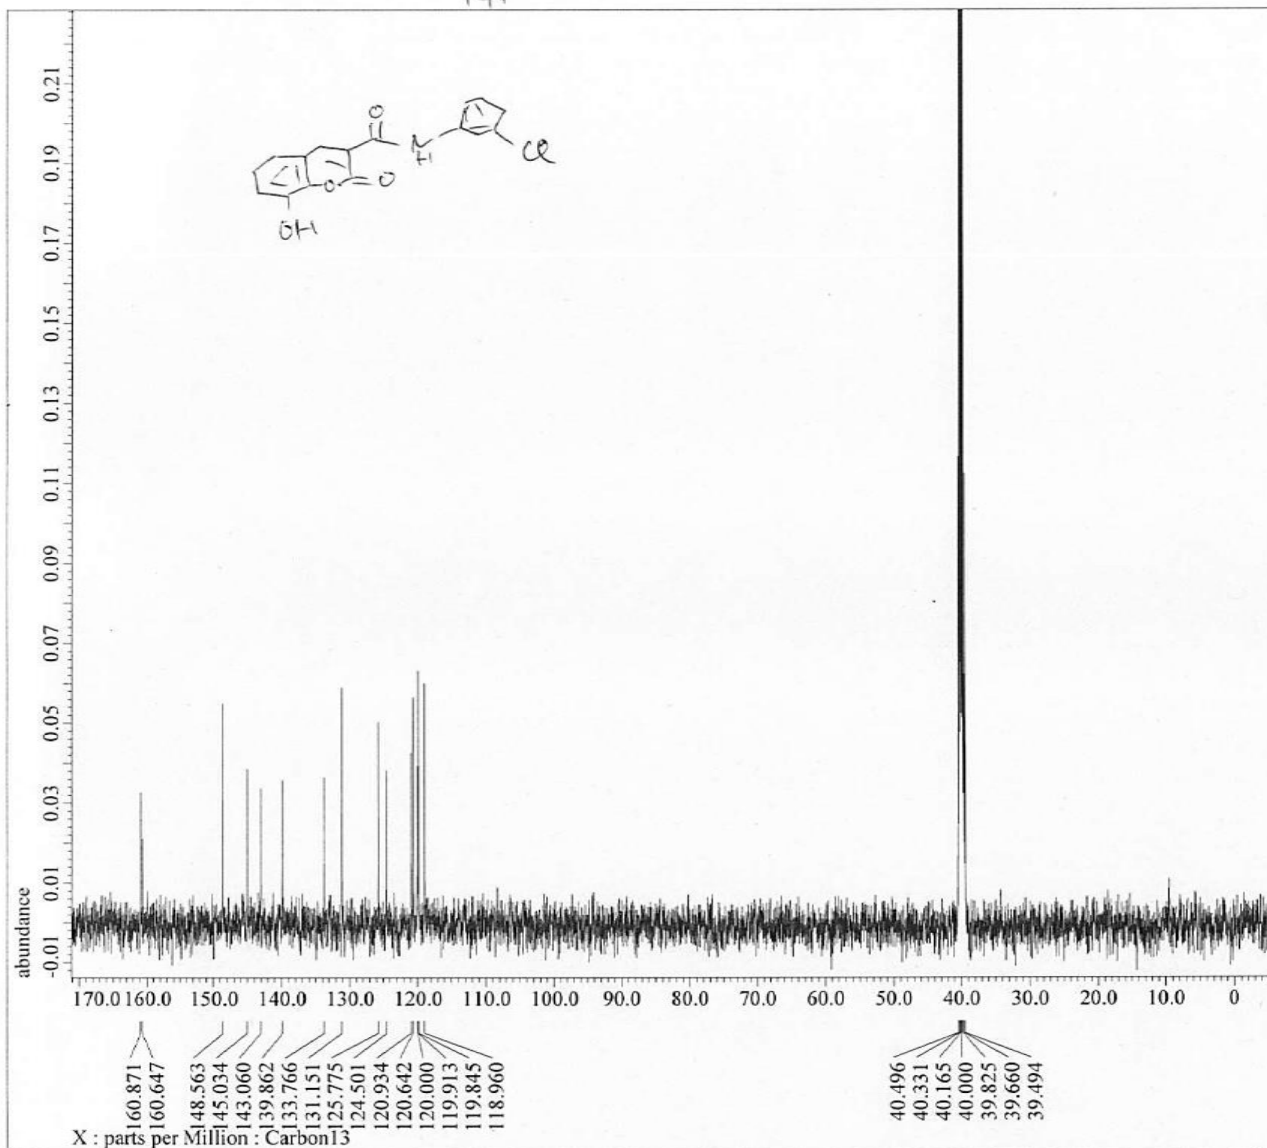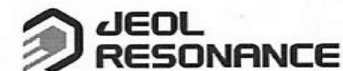

Filename = L1\_ifuku20140203-C01-1-3.j  
 Author = delta  
 Experiment = carbon.jxp  
 Sample Id = L1  
 Solvent = DMSO-D6  
 Creation Time = 3-FEB-2014 13:36:57  
 Revision Time = 3-FEB-2014 13:47:20  
 Current Time = 3-FEB-2014 13:47:39

Comment = p.67-Fr.5  
 Data Format = 1D COMPLEX  
 Dim Size = 26214  
 Dim Title = Carbon13  
 Dim Units = [ppm]  
 Dimensions = X  
 Site = JNM-ECX500  
 Spectrometer = DELTA2\_NMR

Field Strength = 11.7473579[T] (500[MHz])  
 X\_Acq\_Duration = 0.81788928[s]  
 X\_Domain = 13C  
 X\_Freq = 125.76529768[MHz]  
 X\_Offset = 100[ppm]  
 X\_Points = 32768  
 X\_Prescans = 4  
 X\_Resolution = 1.22265938[Hz]  
 X\_Sweep = 40.06410256[kHz]  
 X\_Sweep\_Clipped = 32.05128205[kHz]  
 Irr\_Domain = Proton  
 Irr\_Freq = 500.15991521[MHz]  
 Irr\_Offset = 5.0[ppm]  
 Clipped = TRUE  
 Scans = 216  
 Total Scans = 216

Relaxation Delay = 2[s]  
 Recvr Gain = 46  
 Temp\_Get = 22.5[dc]  
 X\_90\_Width = 9[us]  
 X\_Acq\_Time = 0.81788928[s]  
 X\_Angle = 30[deg]  
 X\_Atn = 5.7[db]  
 X\_Pulse = 3[us]  
 Irr\_Atn\_Dec = 21.987[db]  
 Irr\_Atn\_No = 21.987[db]  
 Irr\_Noise = WALTZ  
 Irr\_Pwidth = 92[us]  
 Decoupling = TRUE  
 Initial Wait = 1[s]  
 Noe = TRUE  
 Noe Time = 2[s]  
 Repetition Time = 2.81788928[s]

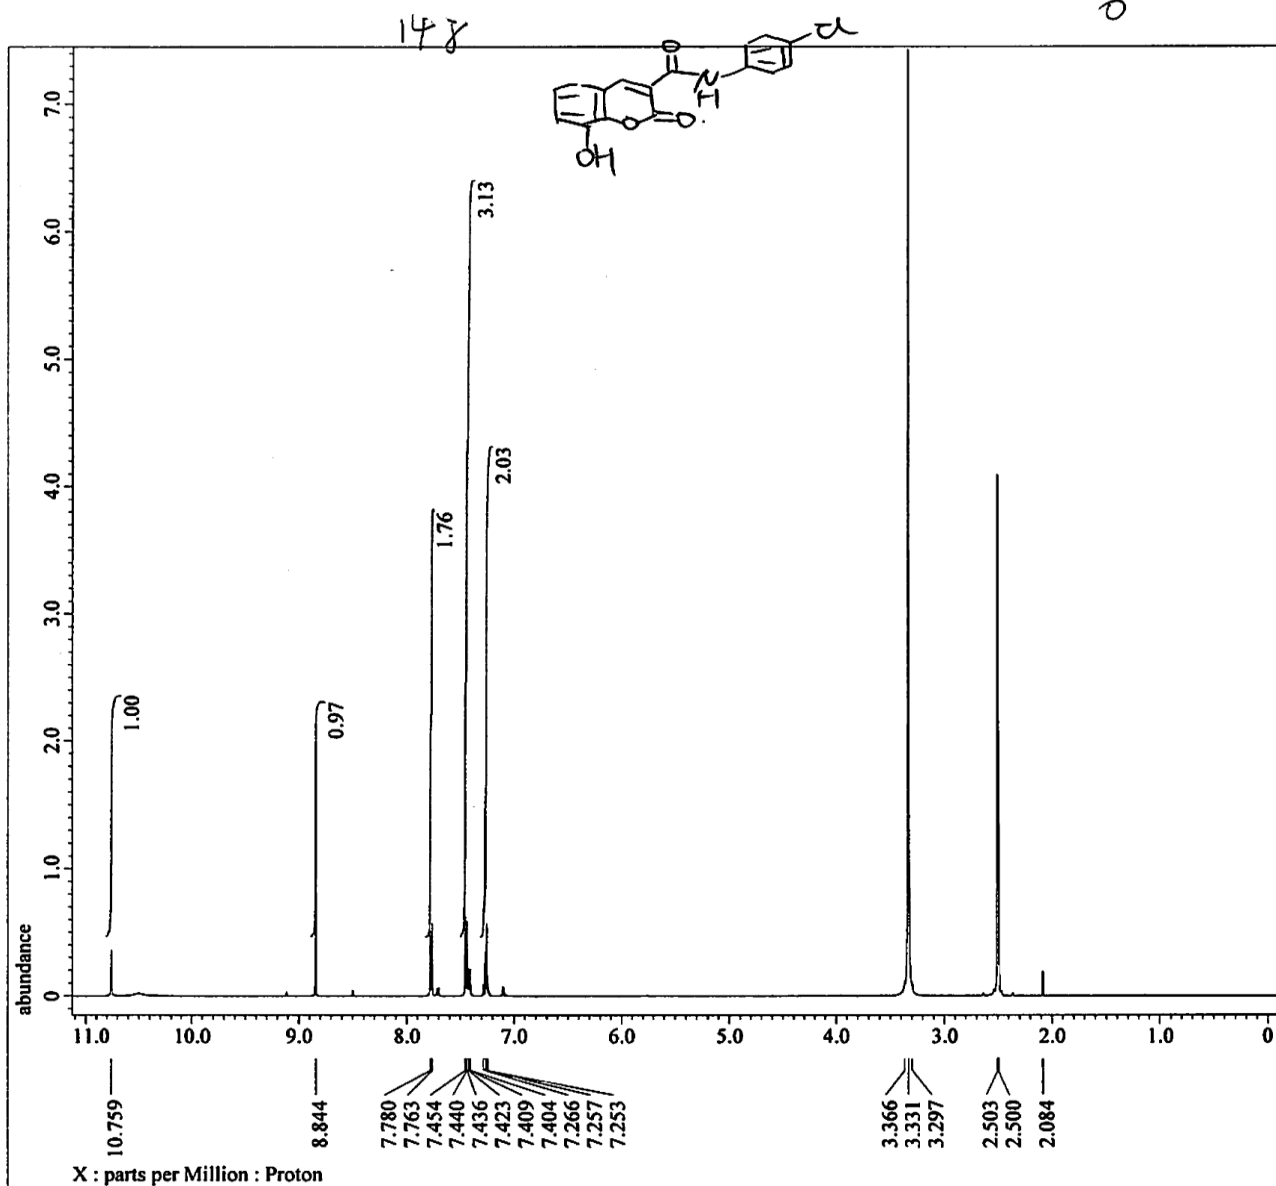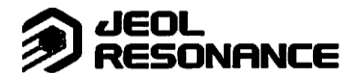

Filename = L1\_hul40312H-1-1-5.jdf  
 Author = delta  
 Experiment = proton.jpg  
 Sample Id = L1  
 Solvent = DMSO-D6  
 Creation Time = 12-MAR-2014 19:11:15  
 Revision Time = 12-MAR-2014 19:12:53  
 Current Time = 12-MAR-2014 19:13:09  
 Comment = 2-p.80-Fr.37-40  
 Data Format = 1D COMPLEX  
 Dim Size = 26214  
 Dim Title = Proton  
 Dim Units = [ppm]  
 Dimensions = X  
 Site = JNM-ECS500  
 Spectrometer = DELTA2 NMR  
 Field Strength = 11.7473579[T] (500[MHz])  
 X\_Acq\_Duration = 3.49175808[s]  
 X\_Domain = 1H  
 X\_Freq = 500.15991521[MHz]  
 X\_Offset = 5.0[ppm]  
 X\_Points = 32768  
 X\_Prescans = 1  
 X\_Resolution = 0.28638868[Hz]  
 X\_Sweep = 9.38438438[kHz]  
 X\_Sweep\_Clippped = 7.50750751[kHz]  
 Irr\_Domain = Proton  
 Irr\_Freq = 500.15991521[MHz]  
 Irr\_Offset = 5.0[ppm]  
 Tri\_Domain = Proton  
 Tri\_Freq = 500.15991521[MHz]  
 Tri\_Offset = 5.0[ppm]  
 Clipped = FALSE  
 Scans = 8  
 Total\_Scans = 8  
 Relaxation\_Delay = 5[s]  
 Recvr\_Gain = 48  
 Temp\_Got = 21.9[dc]  
 X\_90\_Width = 11.6[us]  
 X\_Acq\_Time = 3.49175808[s]  
 X\_Angle = 45[deg]  
 X\_Atn = 4[db]  
 X\_Pulse = 5.8[us]  
 Irr\_Mode = Off  
 Tri\_Mode = Off  
 Danto\_Presat = FALSE  
 Initial\_Wait = 1[s]  
 Repetition\_Time = 8.49175808[s]

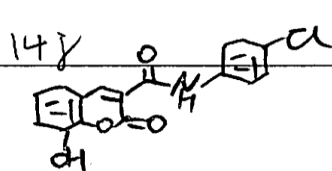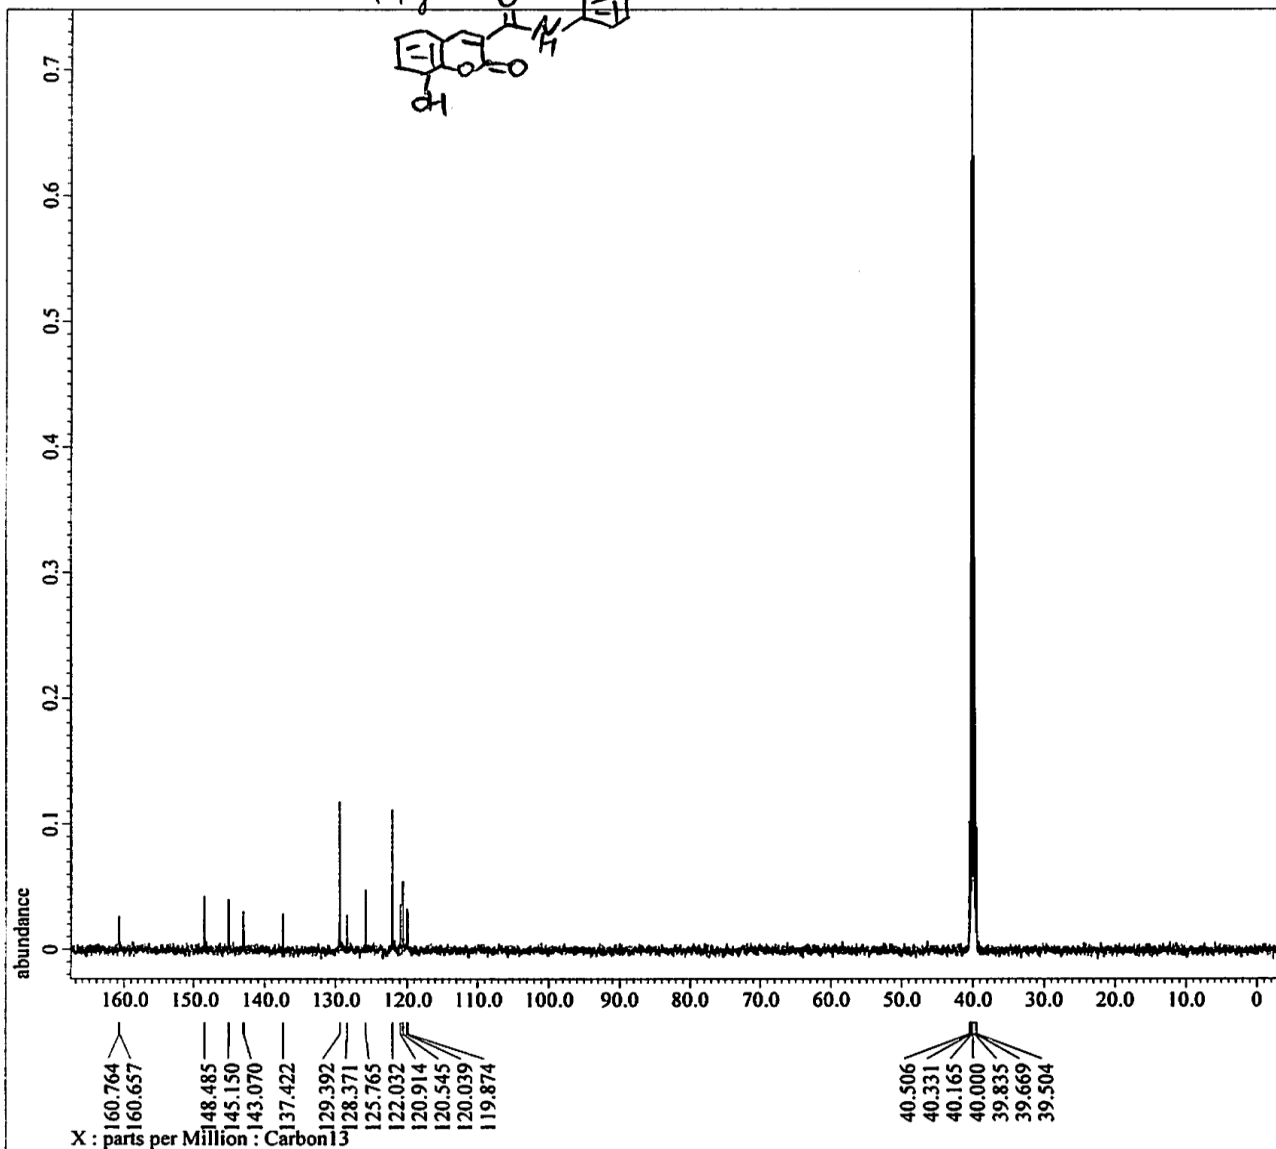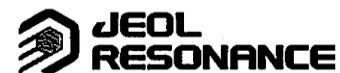

Filename = LI\_hu140409C-1-1-3.jdf  
 Author = delta  
 Experiment = carbon.jsp  
 Sample\_Id = LI  
 Solvent = DMSO-D6  
 Creation\_Time = 9-APR-2014 17:00:20  
 Revision\_Time = 9-APR-2014 17:20:15  
 Current\_Time = 9-APR-2014 17:20:37  
  
 Data\_Format = 1D\_COMPLEX  
 Dim\_Size = 26214  
 Dim\_Title = Carbon13  
 Dim\_Units = [ppm]  
 Dimensions = X  
 Site = JNM-ECX500  
 Spectrometer = DELTA2\_NMR  
  
 Field\_Strength = 11.7473579[T] (500[MHz])  
 X\_Acq\_Duration = 0.81788928[s]  
 X\_Domain = 13C  
 X\_Freq = 125.76529768[MHz]  
 X\_Offset = 100[ppm]  
 X\_Points = 32768  
 X\_Prescans = 4  
 X\_Resolution = 1.22265938[Hz]  
 X\_Sweep = 40.06410256[kHz]  
 X\_Sweep\_Clipped = 32.05128205[kHz]  
 Irr\_Domain = Proton  
 Irr\_Freq = 500.15991521[MHz]  
 Irr\_Offset = 5.0[ppm]  
 Clipped = FALSE  
 Scans = 433  
 Total\_Scans = 433  
  
 Relaxation\_Delay = 2[s]  
 Recvr\_Gain = 46  
 Temp\_Got = 22.2[degC]  
 X\_90\_Width = 9[us]  
 X\_Acq\_Time = 0.81788928[s]  
 X\_Angle = 30[deg]  
 X\_Atn = 5.7[dB]  
 X\_Pulse = 3[us]  
 Irr\_Atn\_Dec = 21.987[dB]  
 Irr\_Atn\_Noe = 21.987[dB]  
 Irr\_Noise = WALTZ  
 Irr\_Pwidth = 92[us]  
 Decoupling = TRUE  
 Initial\_Wait = 1[s]  
 Noo = TRUE  
 Noo\_Time = 2[s]  
 Repetition\_Time = 2.81788928[s]

14k

0

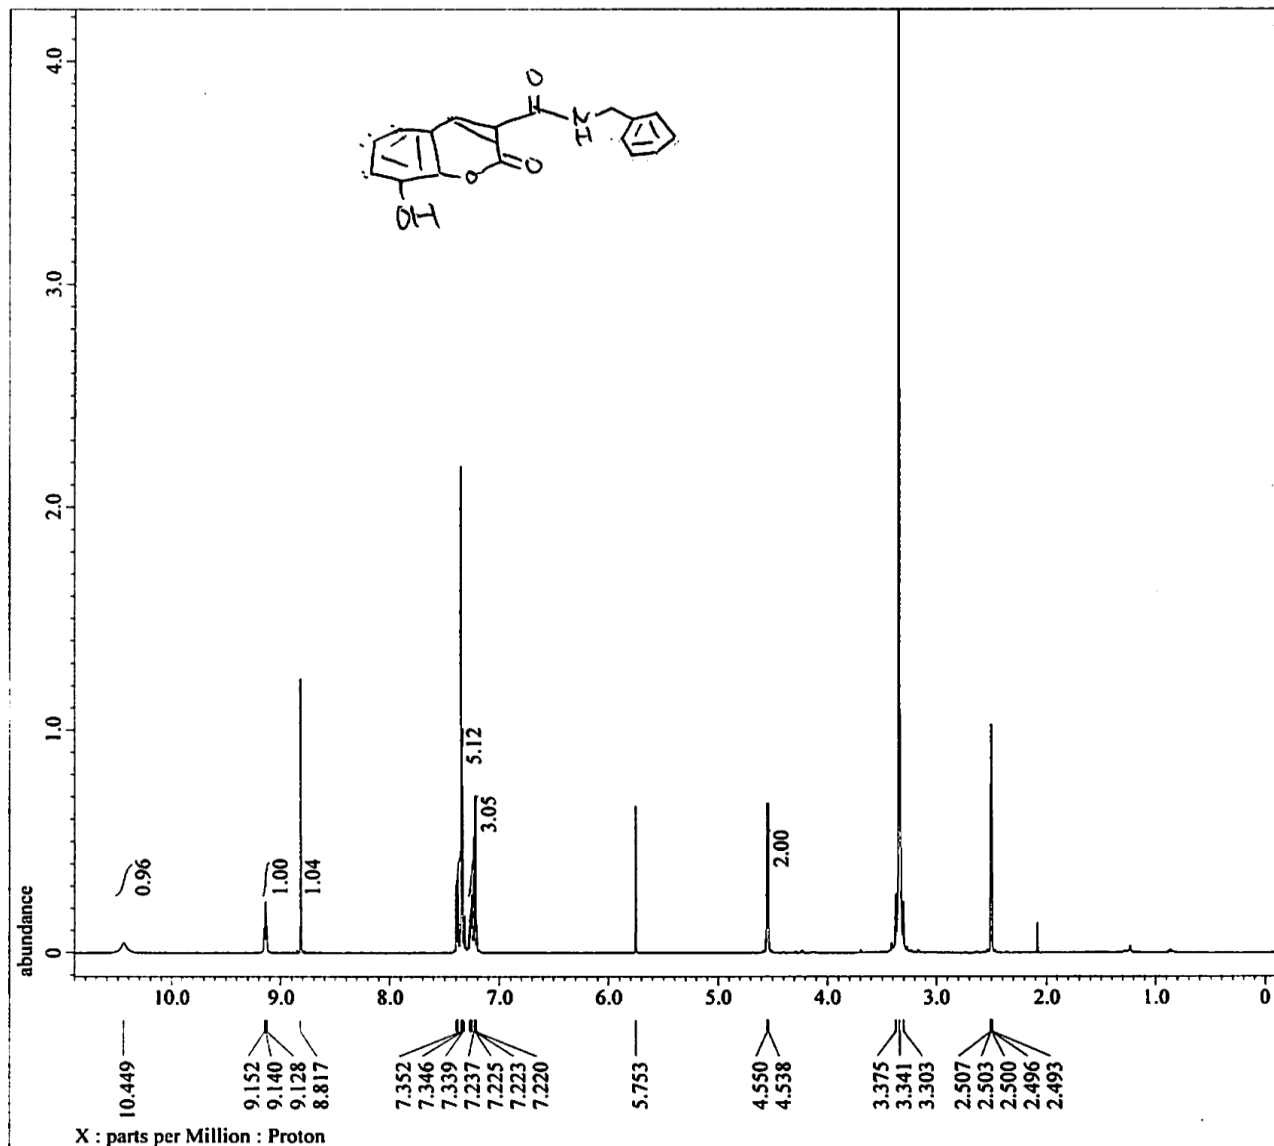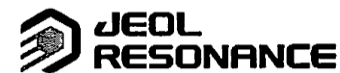

Filename = L1\_ifuku20131217-H01-1-6.j  
 Author = delta  
 Experiment = proton.jxp  
 Sample\_Id = L1  
 Solvent = DMSO-D6  
 Creation Time = 17-DEC-2013 13:34:20  
 Revision Time = 17-DEC-2013 13:37:13  
 Current Time = 17-DEC-2013 13:37:21

Data Format = 1D COMPLEX  
 Dim Size = 26214  
 Dim Title = Proton  
 Dim Units = [ppm]  
 Dimensions = X  
 Site = JNM-ECX500  
 Spectrometer = DELTA2\_NMR

Field Strength = 11.7473579[T] (500[MHz])  
 X\_Acq\_Duration = 3.49175808[s]  
 X\_Domain = 1H  
 X\_Freq = 500.15991521[MHz]  
 X\_Offset = 5.0[ppm]  
 X\_Points = 32768  
 X\_Prescans = 1  
 X\_Resolution = 0.28638868[Hz]  
 X\_Sweep = 9.38438438[kHz]  
 X\_Sweep\_Clipped = 7.50750751[kHz]  
 Irr\_Domain = Proton  
 Irr\_Freq = 500.15991521[MHz]  
 Irr\_Offset = 5.0[ppm]  
 Tri\_Domain = Proton  
 Tri\_Freq = 500.15991521[MHz]  
 Tri\_Offset = 5.0[ppm]  
 Clipped = FALSE  
 Scans = 4  
 Total\_Scans = 4

Relaxation Delay = 5[s]  
 Recvr\_Gain = 46  
 Temp\_Got = 22.2[dC]  
 X\_90\_Width = 11.6[us]  
 X\_Acq\_Time = 3.49175808[s]  
 X\_Angle = 45[deg]  
 X\_Atn = 4[dB]  
 X\_Pulse = 5.8[us]  
 Irr\_Mode = Off  
 Tri\_Mode = Off  
 Danto\_Preset = FALSE  
 Initial\_Wait = 1[s]  
 Repetition\_Time = 8.49175808[s]

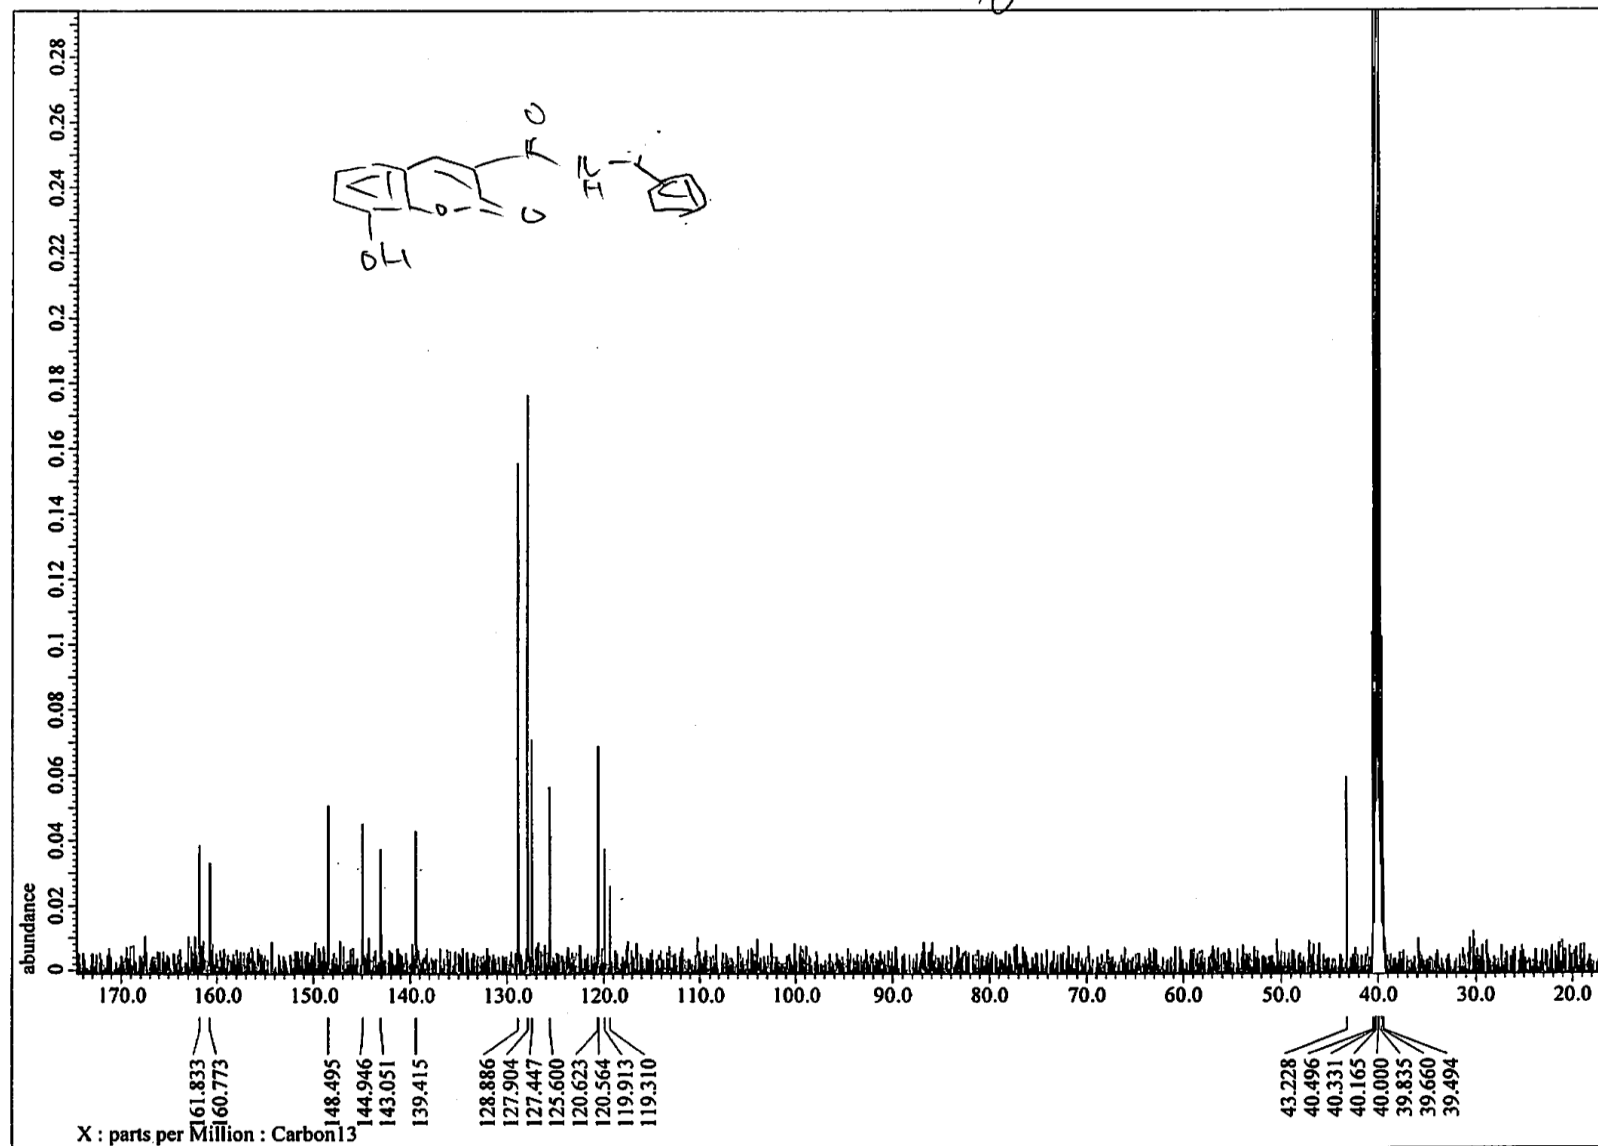

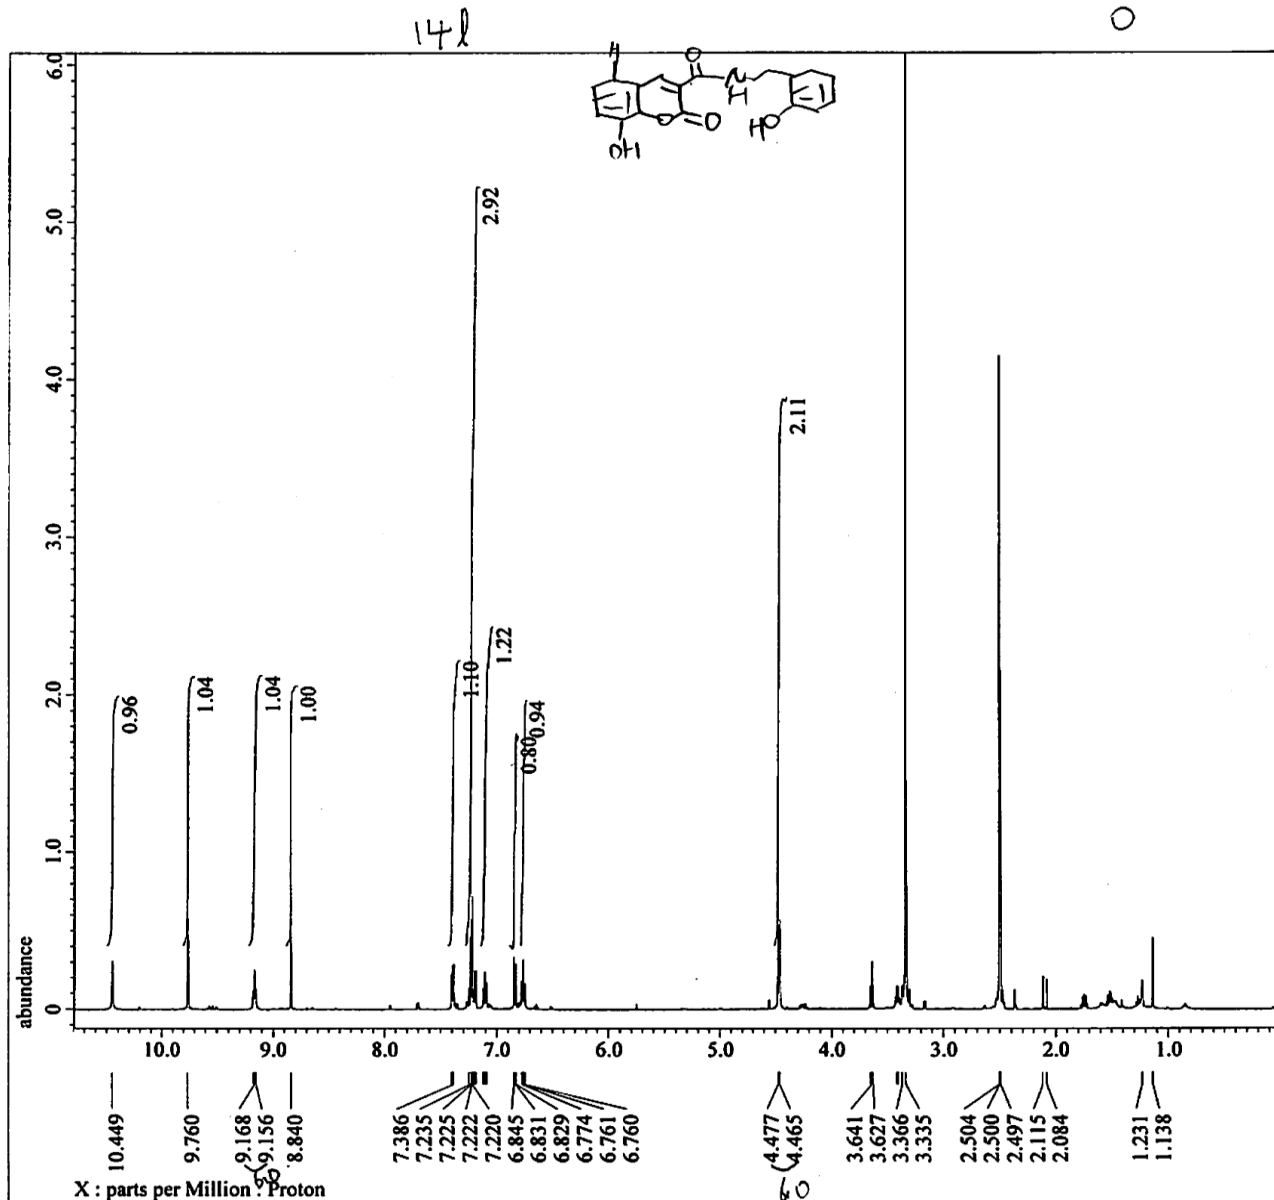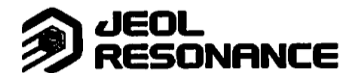

Filename = LI\_hul40311H-2-1-5.jdf  
 Author = delta  
 Experiment = proton.jxp  
 Sample Id = LI  
 Solvent = DMSO-D6  
 Creation Time = 11-MAR-2014 14:32:57  
 Revision Time = 11-MAR-2014 14:35:44  
 Current Time = 11-MAR-2014 14:35:57  
 Data Format = 1D COMPLEX  
 Dim Size = 26214  
 Dim Title = Proton  
 Dim Units = [ppm]  
 Dimensions = X  
 Site = JNM-ECX500  
 Spectrometer = DELTA2 NMR  
 Field Strength = 11.7473579[T] (500[MHz])  
 X Acq Duration = 3.49175808[s]  
 X Domain = 1H  
 X Freq = 500.15991521[MHz]  
 X Offset = 5.0[ppm]  
 X Points = 32768  
 X Proscans = 1  
 X Resolution = 0.28638868[Hz]  
 X Swoop = 9.38438438[kHz]  
 X Swoop Clipped = 7.50750751[kHz]  
 Irr Domain = Proton  
 Irr Freq = 500.15991521[MHz]  
 Irr Offset = 5.0[ppm]  
 Tri Domain = Proton  
 Tri Freq = 500.15991521[MHz]  
 Tri Offset = 5.0[ppm]  
 Clipped = FALSE  
 Scans = 8  
 Total Scans = 8  
 Relaxation Delay = 5[s]  
 Recvr Gain = 48  
 Temp Got = 21.2[dC]  
 X 90 Width = 11.6[us]  
 X Acq Time = 3.49175808[s]  
 X Angle = 45[deg]  
 X Atn = 4[dB]  
 X Pulse = 5.8[us]  
 Irr Mode = Off  
 Tri Mode = Off  
 Danto Presat = FALSE  
 Initial Wait = 1[s]  
 Repetition Time = 8.49175808[s]

148 ~~148~~

0

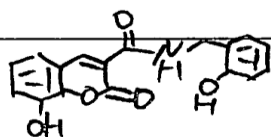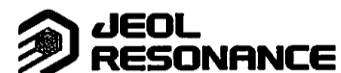

Filename = L1\_hul40410C-2-1-3.jdf  
Author = delta  
Experiment = carbon.jsp  
Sample Id = L1  
Solvent = DMSO-D6  
Creation Time = 10-APR-2014 13:46:27  
Revision Time = 10-APR-2014 13:59:17  
Current Time = 10-APR-2014 13:59:30

Data Format = 1D COMPLEX  
Dim Size = 26214  
Dim Title = Carbon13  
Dim Units = [ppm]  
Dimensions = X  
Site = JNM-ECX500  
Spectrometer = DELTA2\_NMR

Field Strength = 11.7473579[T] (500(MHz))  
X\_Acq\_Duration = 0.81788928[s]  
X\_Domain = 13C  
X\_Freq = 125.76529768(MHz)  
X\_Offset = 100[ppm]  
X\_Points = 32768  
X\_Proscans = 4  
X\_Resolution = 1.22265938[Hz]  
X\_Sweep = 40.06410256[kHz]  
X\_Sweep\_Clipped = 32.05128205[kHz]  
Irr\_Domain = Proton  
Irr\_Freq = 500.15991521(MHz)  
Irr\_Offset = 5.0[ppm]  
Clipped = FALSE  
Scans = 275  
Total\_Scans = 275

Relaxation\_Delay = 2[s]  
Recvr\_Gain = 46  
Temp\_Get = 21.9[dC]  
X\_90\_Width = 9[us]  
X\_Acq\_Time = 0.81788928[s]  
X\_Angle = 30[deg]  
X\_Atn = 5.7[dB]  
X\_Pulse = 3[us]  
Irr\_Atn\_Dec = 21.987[dB]  
Irr\_Atn\_Noe = 21.987[dB]  
Irr\_Noise = WALTZ  
Irr\_Pwidth = 92[us]  
Decoupling = TRUE  
Initial\_Wait = 1[s]  
Noc = TRUE  
Noc\_Time = 2[s]  
Repetition\_Time = 2.81788928[s]

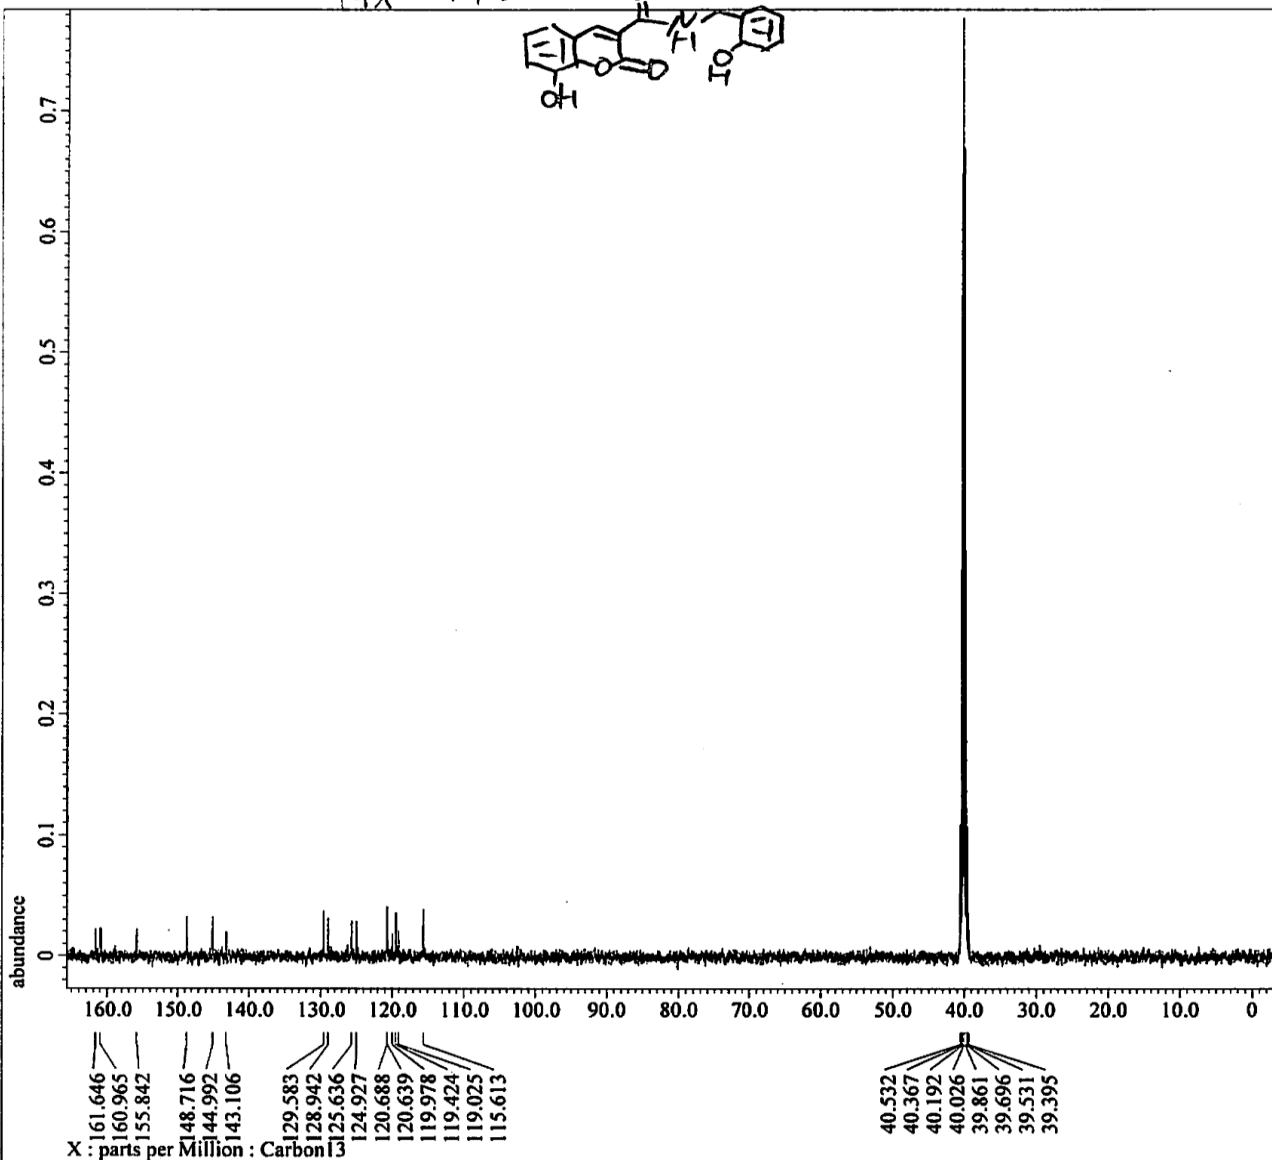



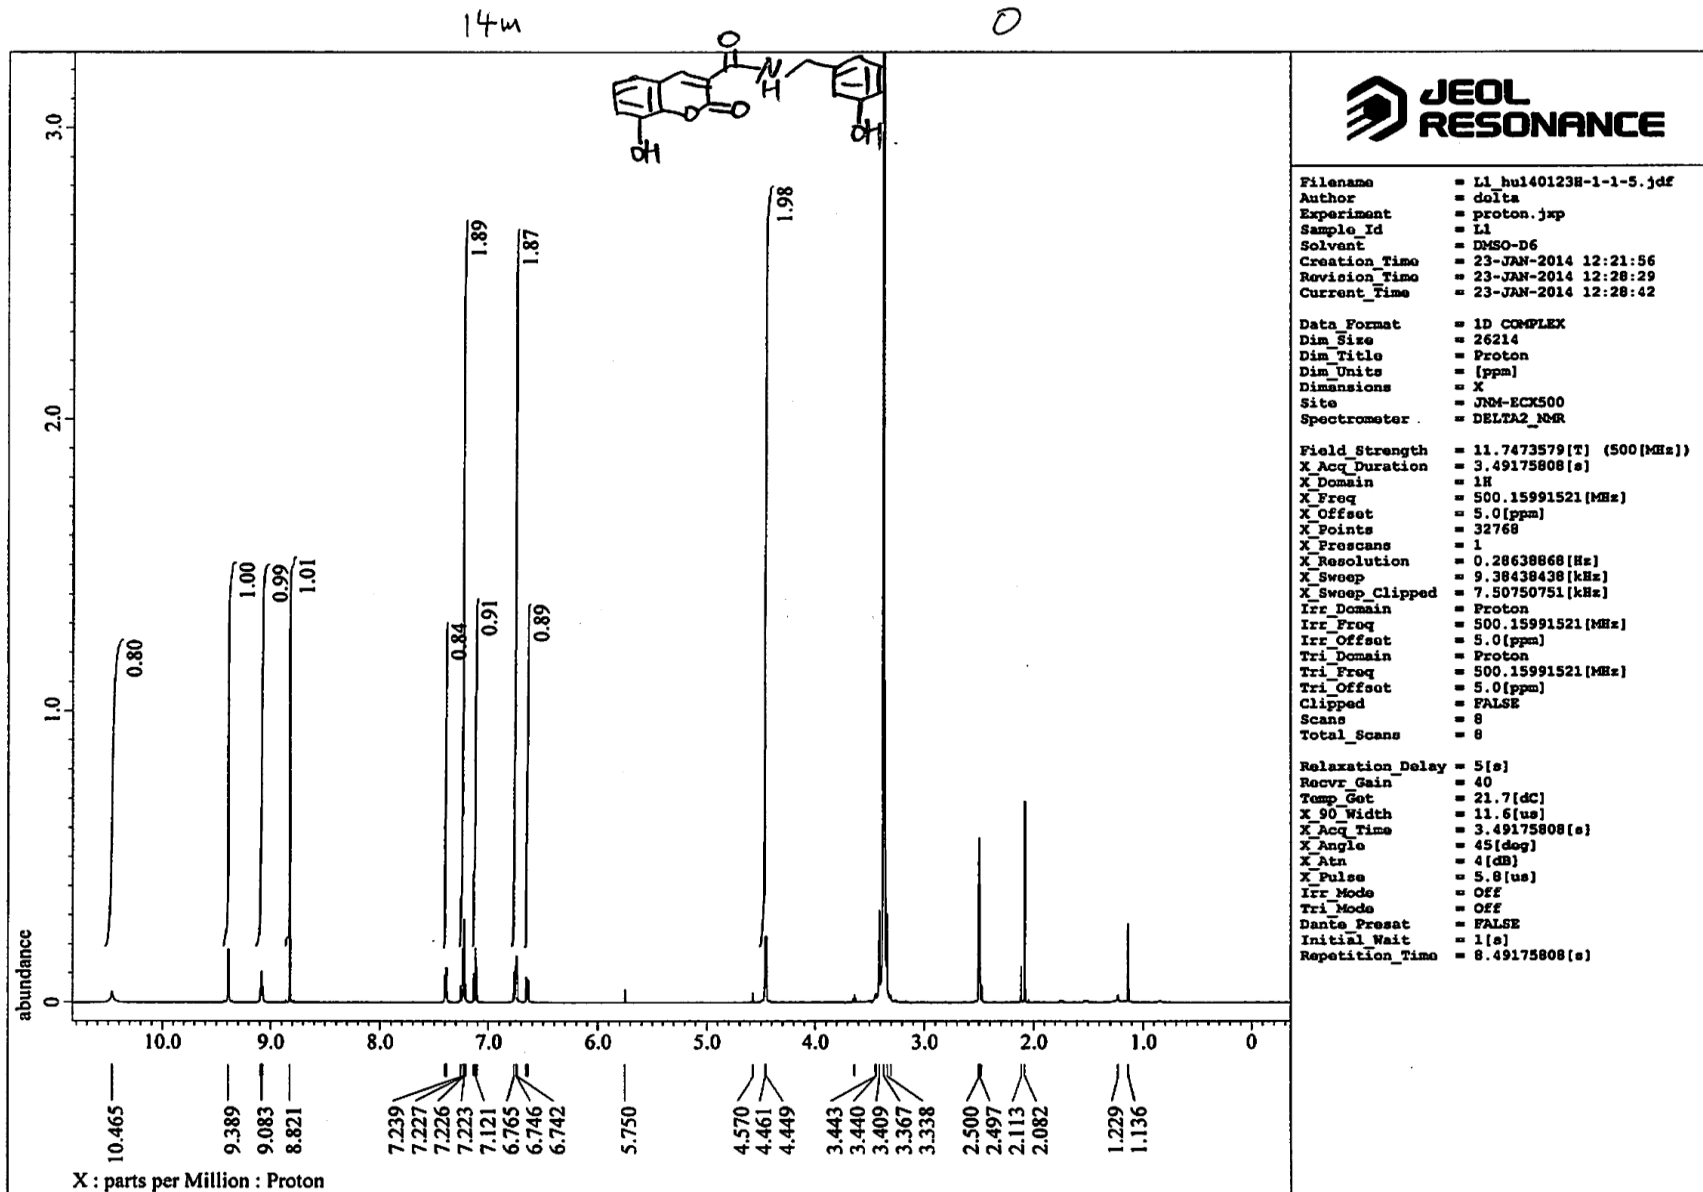

14m

0

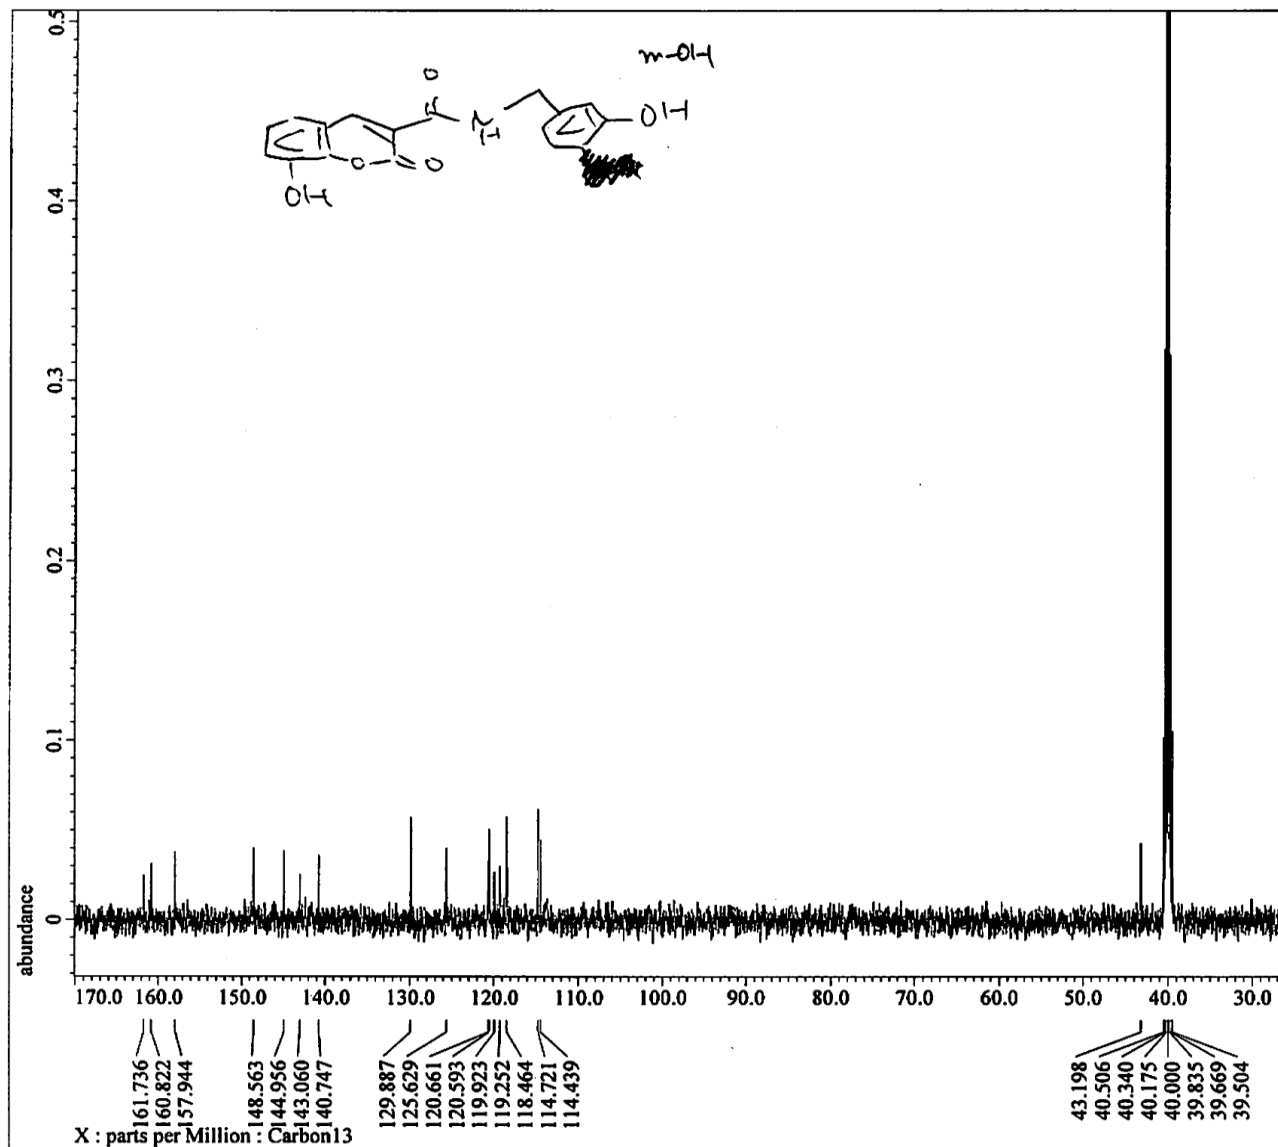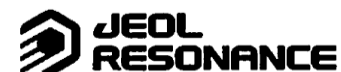

Filename = L1\_ifuku20140130-C02-1-3.j  
 Author = delta  
 Experiment = carbon.jxp  
 Sample\_Id = L1  
 Solvent = DMSO-D6  
 Creation\_Time = 30-JAN-2014 14:08:20  
 Revision\_Time = 30-JAN-2014 14:14:50  
 Current\_Time = 30-JAN-2014 14:16:01

Comment = p. 67-Pr.5  
 Data\_Format = 1D COMPLEX  
 Dim\_Size = 26214  
 Dim\_Title = Carbon13  
 Dim\_Units = [ppm]  
 Dimensions = X  
 Site = JNM-ECX500  
 Spectrometer = DELTA2 NMR

Field\_Strength = 11.7473579 [T] (500 [MHz])  
 X\_Acq\_Duration = 0.81788928 [s]  
 X\_Domain = 13C  
 X\_Freq = 125.76529768 [MHz]  
 X\_Offset = 100 [ppm]  
 X\_Points = 32768  
 X\_Prescans = 4  
 X\_Resolution = 1.22265938 [Hz]  
 X\_Sweep = 40.06410256 [kHz]  
 X\_Sweep\_Clipped = 32.05128205 [kHz]  
 Irr\_Domain = Proton  
 Irr\_Freq = 500.15991521 [MHz]  
 Irr\_Offset = 5.0 [ppm]  
 Clipped = FALSE  
 Scans = 129  
 Total\_Scans = 129

Relaxation\_Delay = 2 [s]  
 Recvr\_Gain = 46  
 Temp\_Set = 22.8 [dC]  
 X\_90\_Width = 9 [us]  
 X\_Acq\_Time = 0.81788928 [s]  
 X\_Angle = 30 [deg]  
 X\_Atn = 5.7 [dB]  
 X\_Pulse = 3 [us]  
 Irr\_Atn\_Dec = 21.987 [dB]  
 Irr\_Atn\_Noe = 21.987 [dB]  
 Irr\_Noise = WALTZ  
 Irr\_Pwidth = 92 [us]  
 Decoupling = TRUE  
 Initial\_Wait = 1 [s]  
 Noe = TRUE  
 Noe\_Time = 2 [s]  
 Repetition\_Time = 2.81788928 [s]

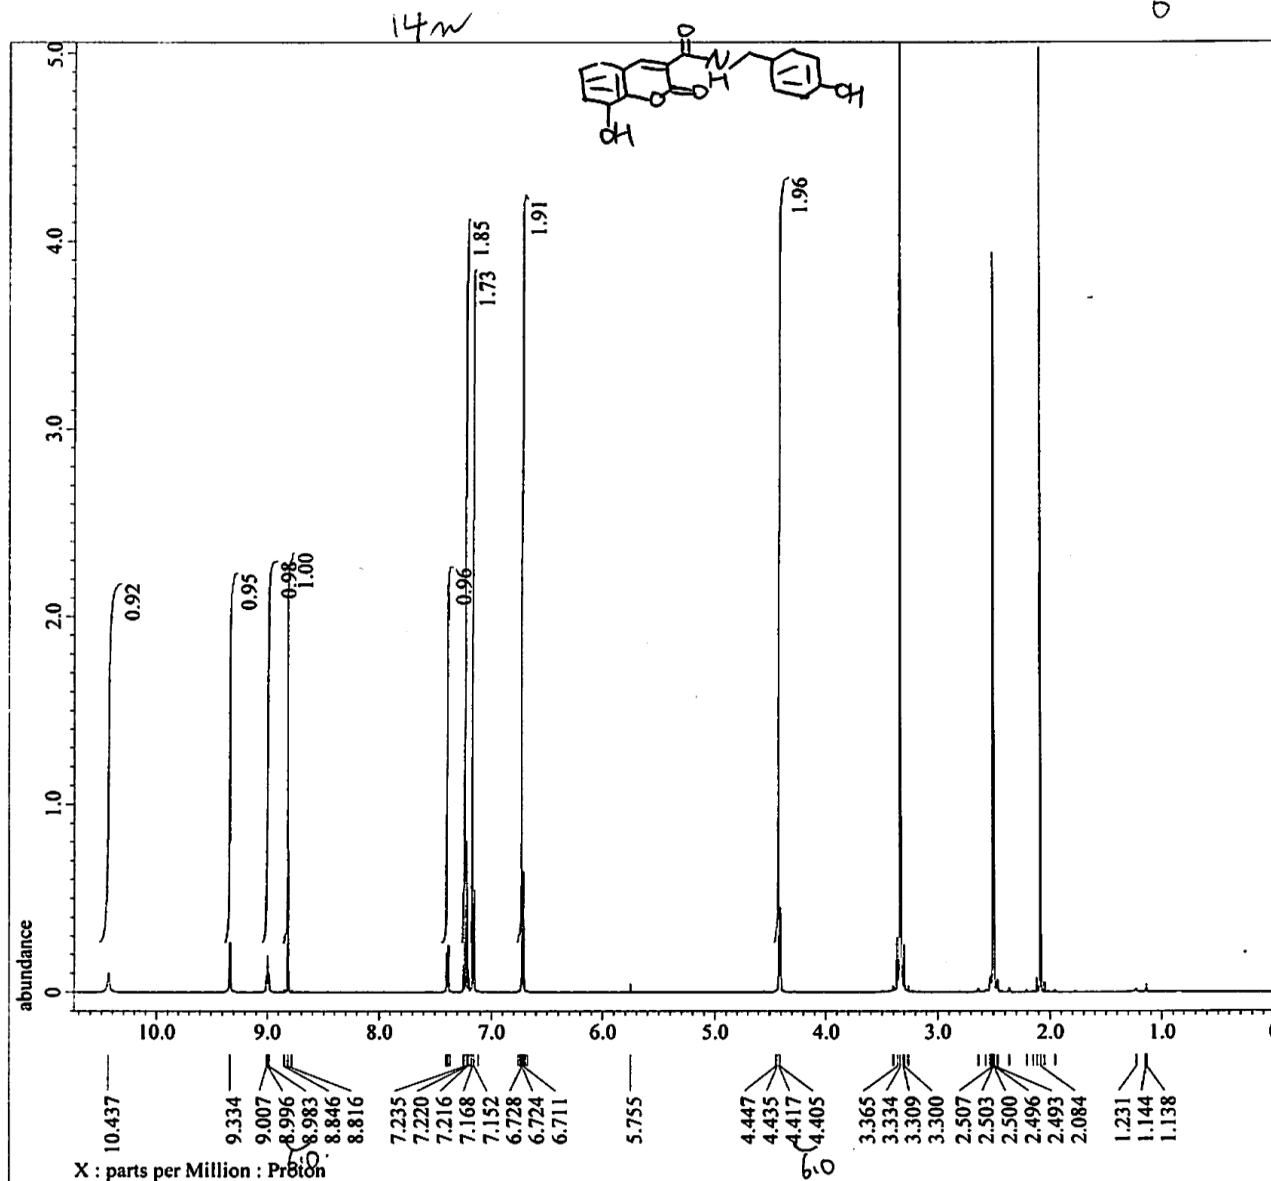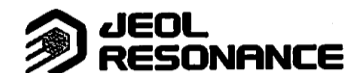

Filename = L1\_hul40404H-2-1-4.jdf  
 Author = delta  
 Experiment = proton.jxp  
 Sample\_Id = L1  
 Solvent = DMSO-D6  
 Cretion Time = 4-APR-2014 13:23:53  
 Revision Time = 4-APR-2014 13:25:15  
 Current Time = 4-APR-2014 13:26:05  
 Data Format = 1D COMPLEX  
 Dim Size = 26214  
 Dim Title = Proton  
 Dim Units = [ppm]  
 Dimensions = X  
 Site = JNM-ECK500  
 Spectrometer = DELTA2 NMR  
 Field Strength = 11.7473579[T] (500[MHz])  
 X Acq Duration = 3.49175808[s]  
 X Domain = 1H  
 X Freq = 500.15991521[MHz]  
 X Offset = 5.0[ppm]  
 X Points = 32768  
 X Prescans = 1  
 X Resolution = 0.28638668[Hz]  
 X Sweep = 9.38438438[kHz]  
 X Sweep Clipped = 7.50750751[kHz]  
 Irr Domain = Proton  
 Irr Freq = 500.15991521[MHz]  
 Irr Offset = 5.0[ppm]  
 Tri Domain = Proton  
 Tri Freq = 500.15991521[MHz]  
 Tri Offset = 5.0[ppm]  
 Clipped = FALSE  
 Scans = 3  
 Total Scans = 3  
 Relaxation Delay = 5[s]  
 Recvr Gain = 46  
 Temp Got = 21.9[dc]  
 X 90 Width = 11.6[us]  
 X Acq Time = 3.49175808[s]  
 X Angle = 45[deg]  
 X Atn = 4[db]  
 X Pulse = 5.8[us]  
 Irr Mode = Off  
 Tri Mode = Off  
 Dante Presat = FALSE  
 Initial Wait = 1[s]  
 Repetition Time = 8.49175808[s]

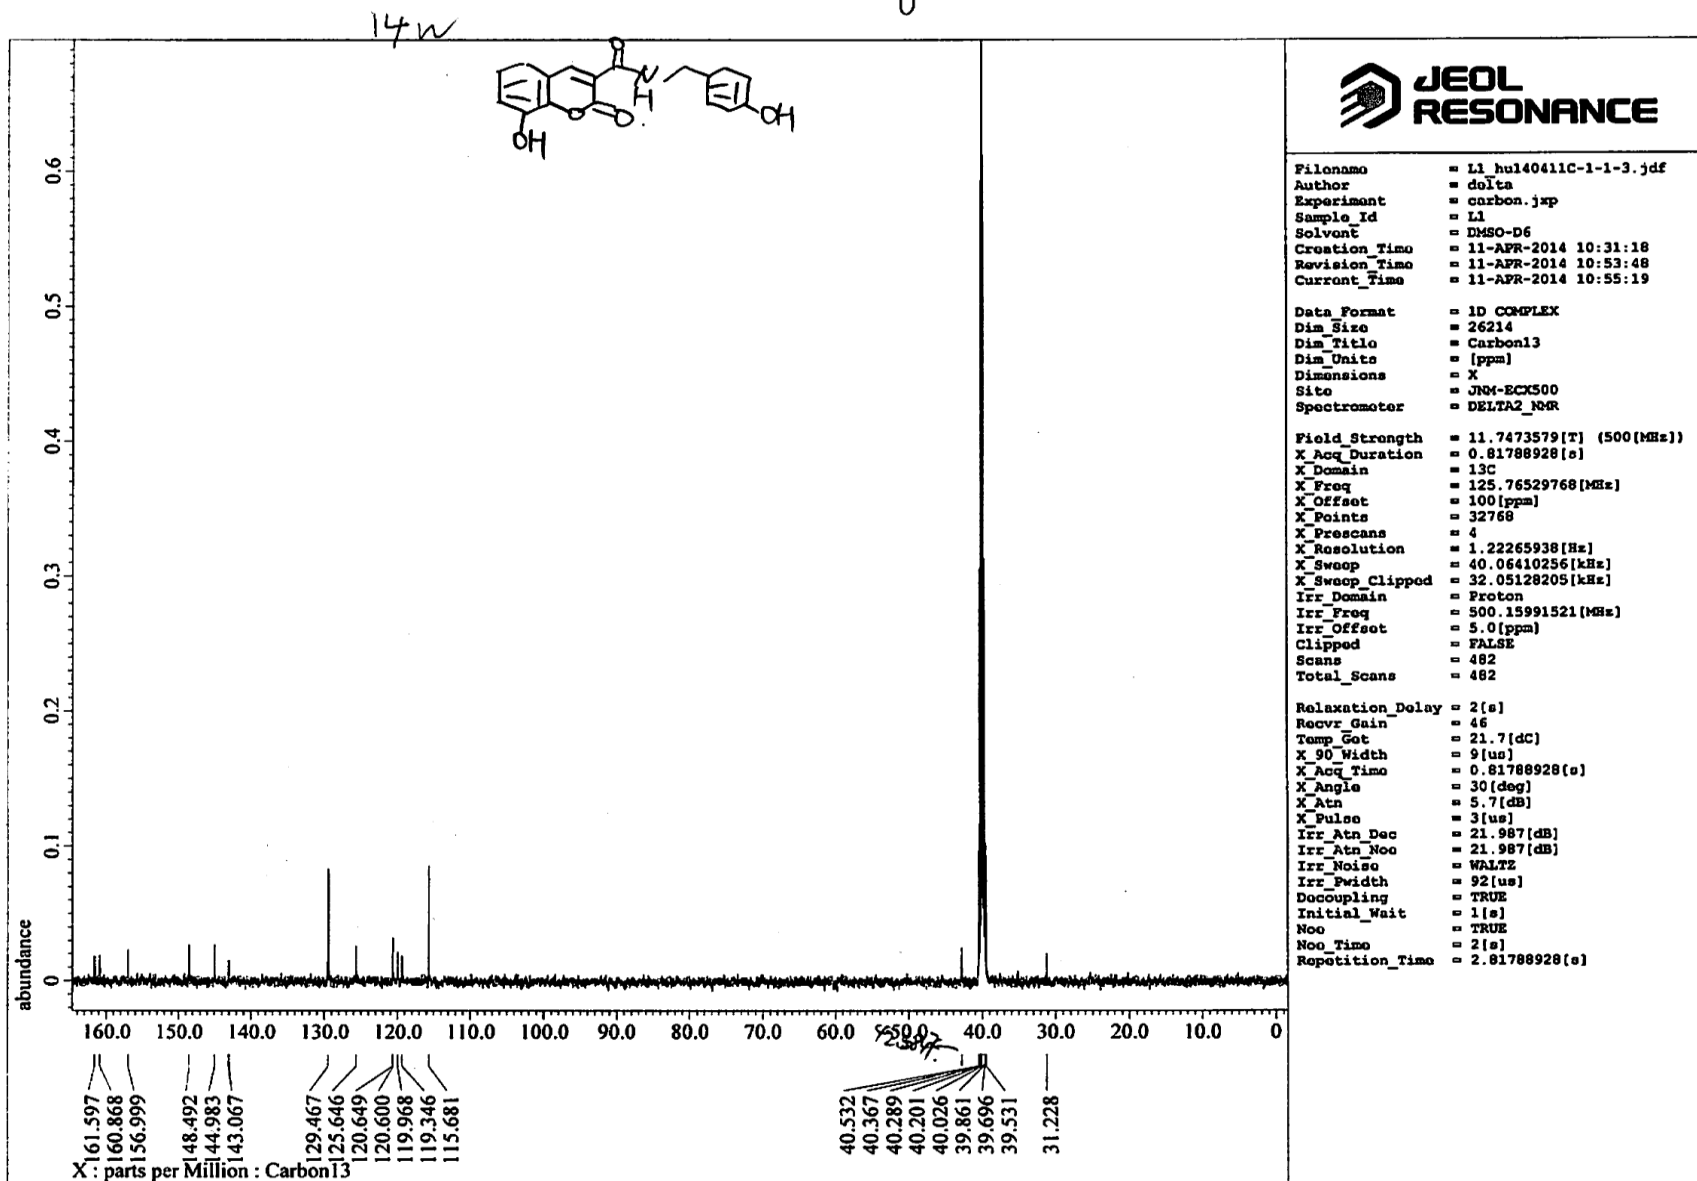

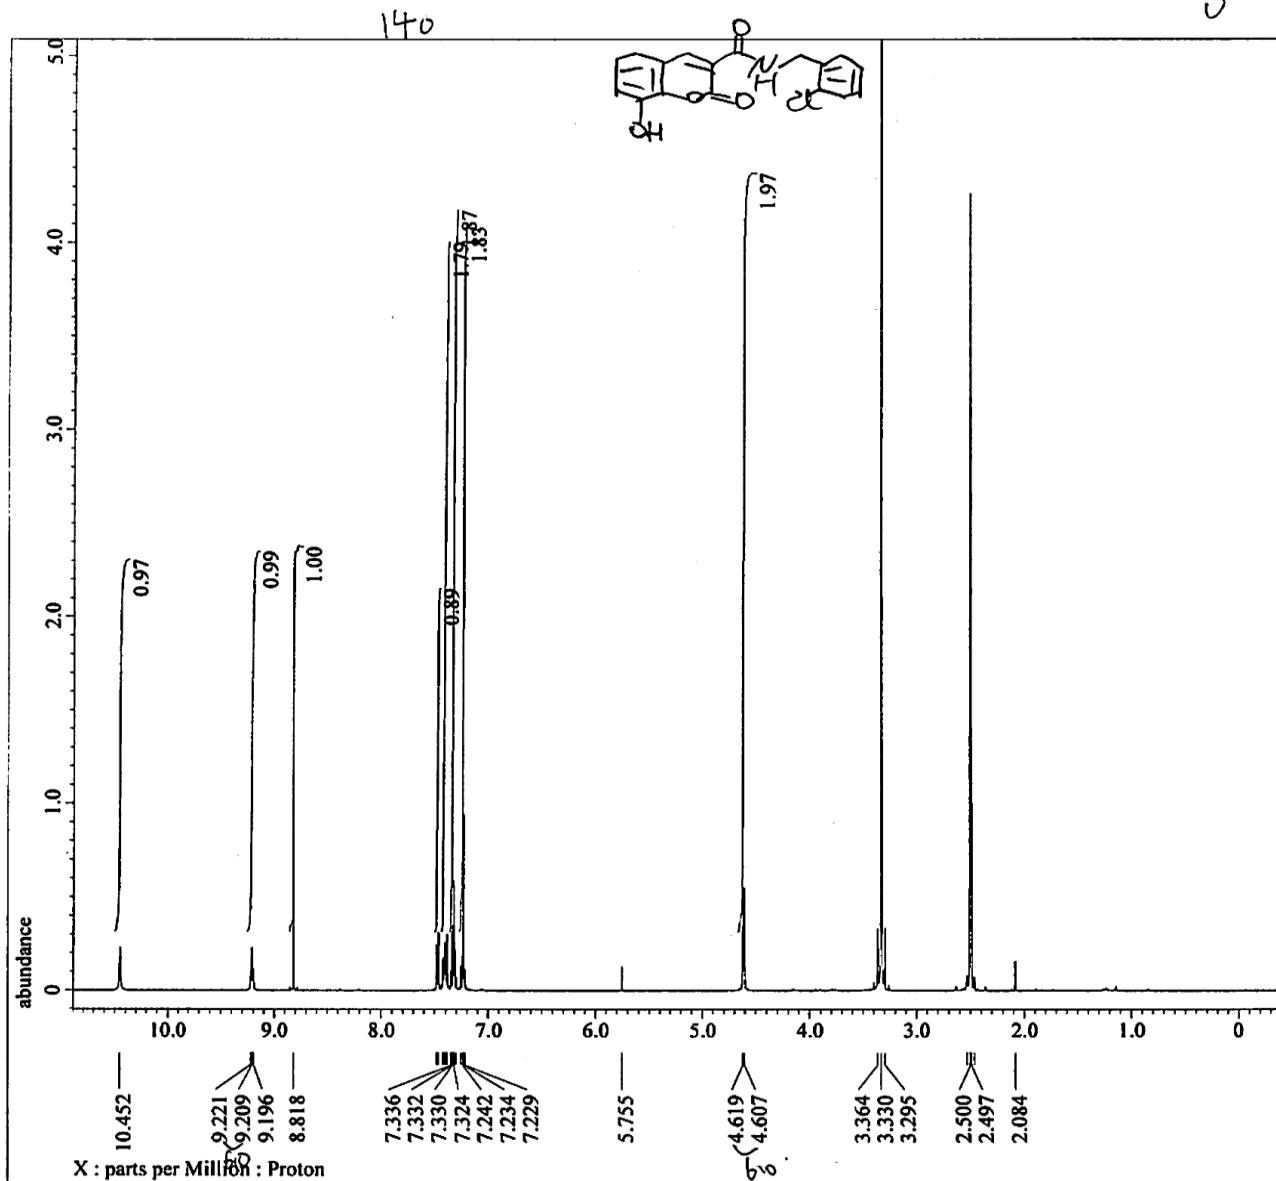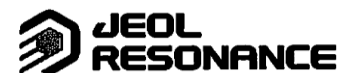

Filename = LI\_xia140320H-2-1-5.jdf  
Author = delta  
Experiment = proton.jpg  
Sample Id = LI  
Solvent = DMSO-D6  
Creation Time = 20-MAR-2014 13:03:31  
Revision Time = 20-MAR-2014 13:05:12  
Current Time = 20-MAR-2014 13:05:24

Data Format = 1D COMPLEX  
Dim Size = 26214  
Dim Title = Proton  
Dim Units = [ppm]  
Dimensions = X  
Site = JRM-ECS500  
Spectrometer = DELTA2\_NMR

Field Strength = 11.7473579[T] (500[MHz])  
X\_Acq\_Duration = 3.49175808[s]  
X\_Domain = 1H  
X\_Freq = 500.15991521[MHz]  
X\_Offset = 5.0[ppm]  
X\_Points = 32768  
X\_Proscans = 1  
X\_Resolution = 0.28638868[Hz]  
X\_Sweep = 9.38438438[kHz]  
X\_Sweep\_Clipped = 7.50750751[kHz]  
Irr\_Domain = Proton  
Irr\_Freq = 500.15991521[MHz]  
Irr\_Offset = 5.0[ppm]  
Tri\_Domain = Proton  
Tri\_Freq = 500.15991521[MHz]  
Tri\_Offset = 5.0[ppm]  
Clipped = FALSE  
Scans = 8  
Total\_Scans = 8

Relaxation\_Delay = 5[s]  
Recvr\_Gain = 48  
Temp\_Get = 22.7[degC]  
X\_90\_Width = 11.6[us]  
X\_Acq\_Time = 3.49175808[s]  
X\_Angle = 45[deg]  
X\_Atn = 4[dB]  
X\_Pulse = 5.8[us]  
Irr\_Mode = Off  
Tri\_Mode = Off  
Dante\_Preset = FALSE  
Initial\_Wait = 1[s]  
Repetition\_Time = 8.49175808[s]

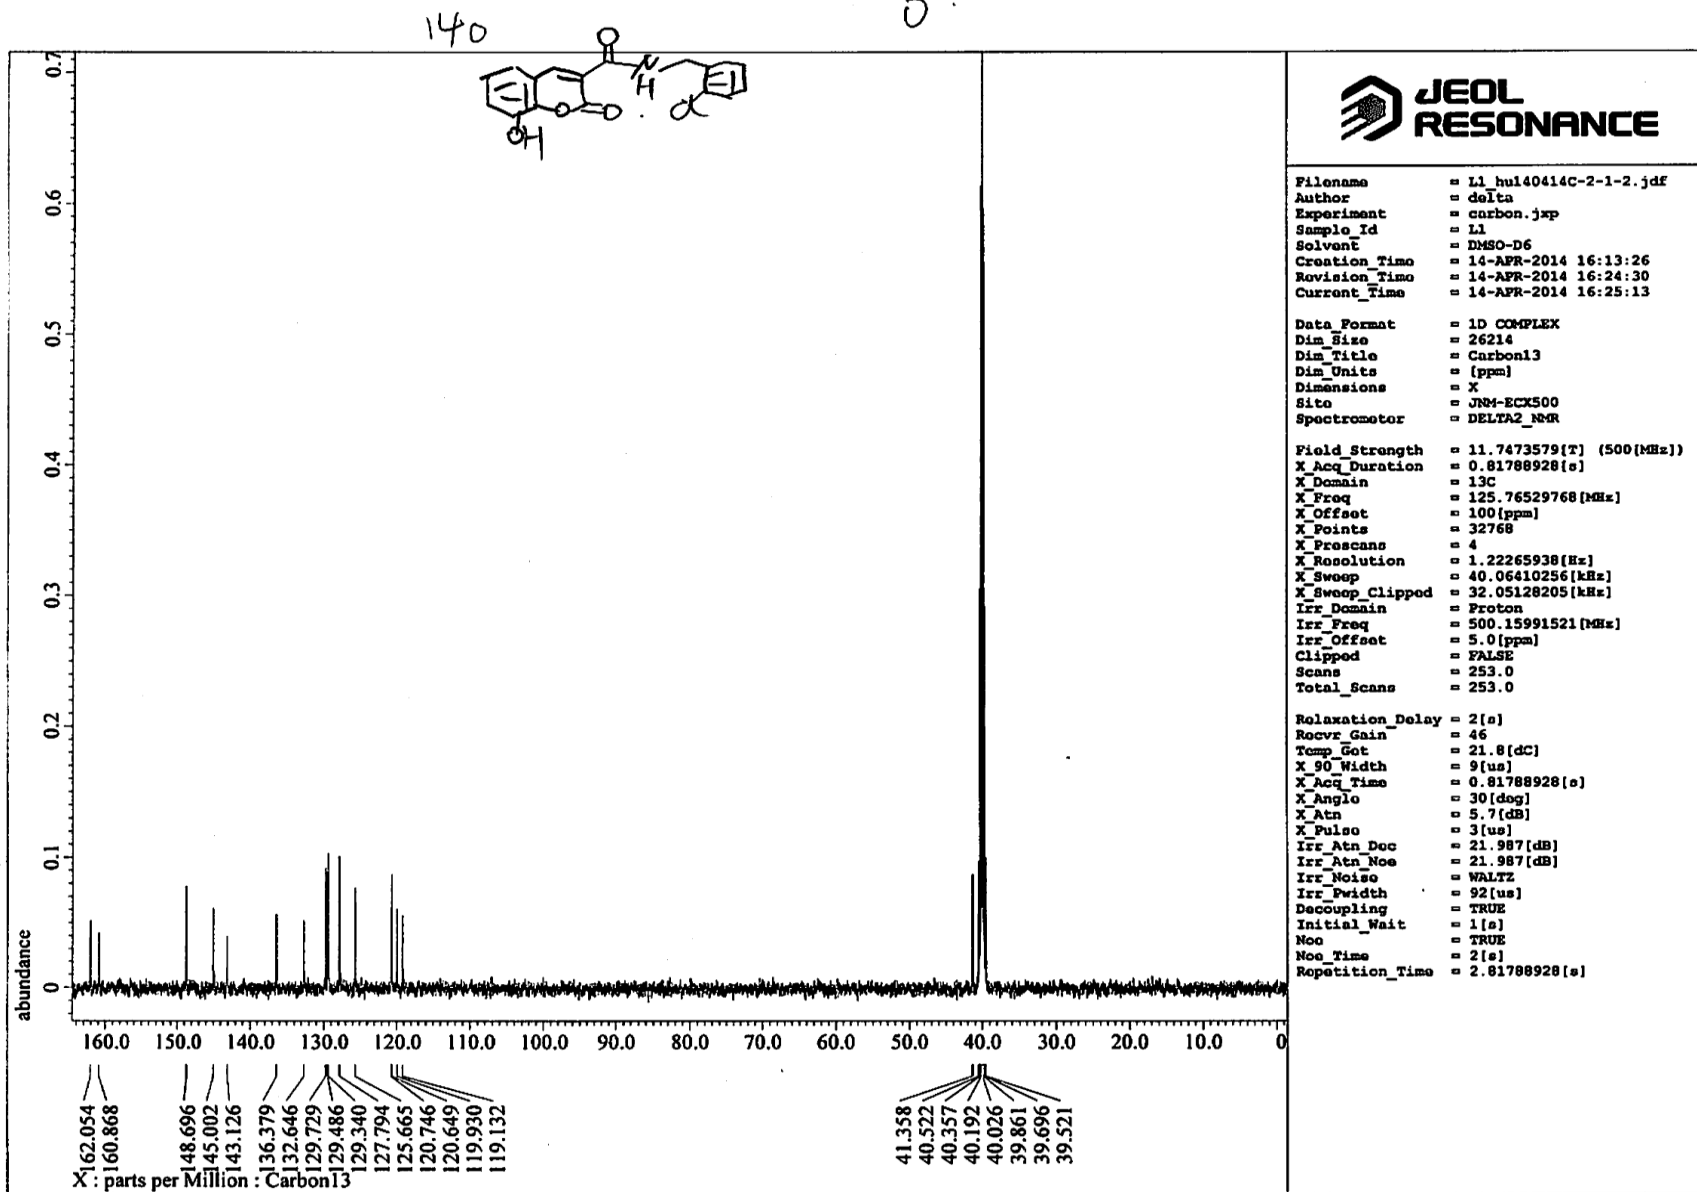

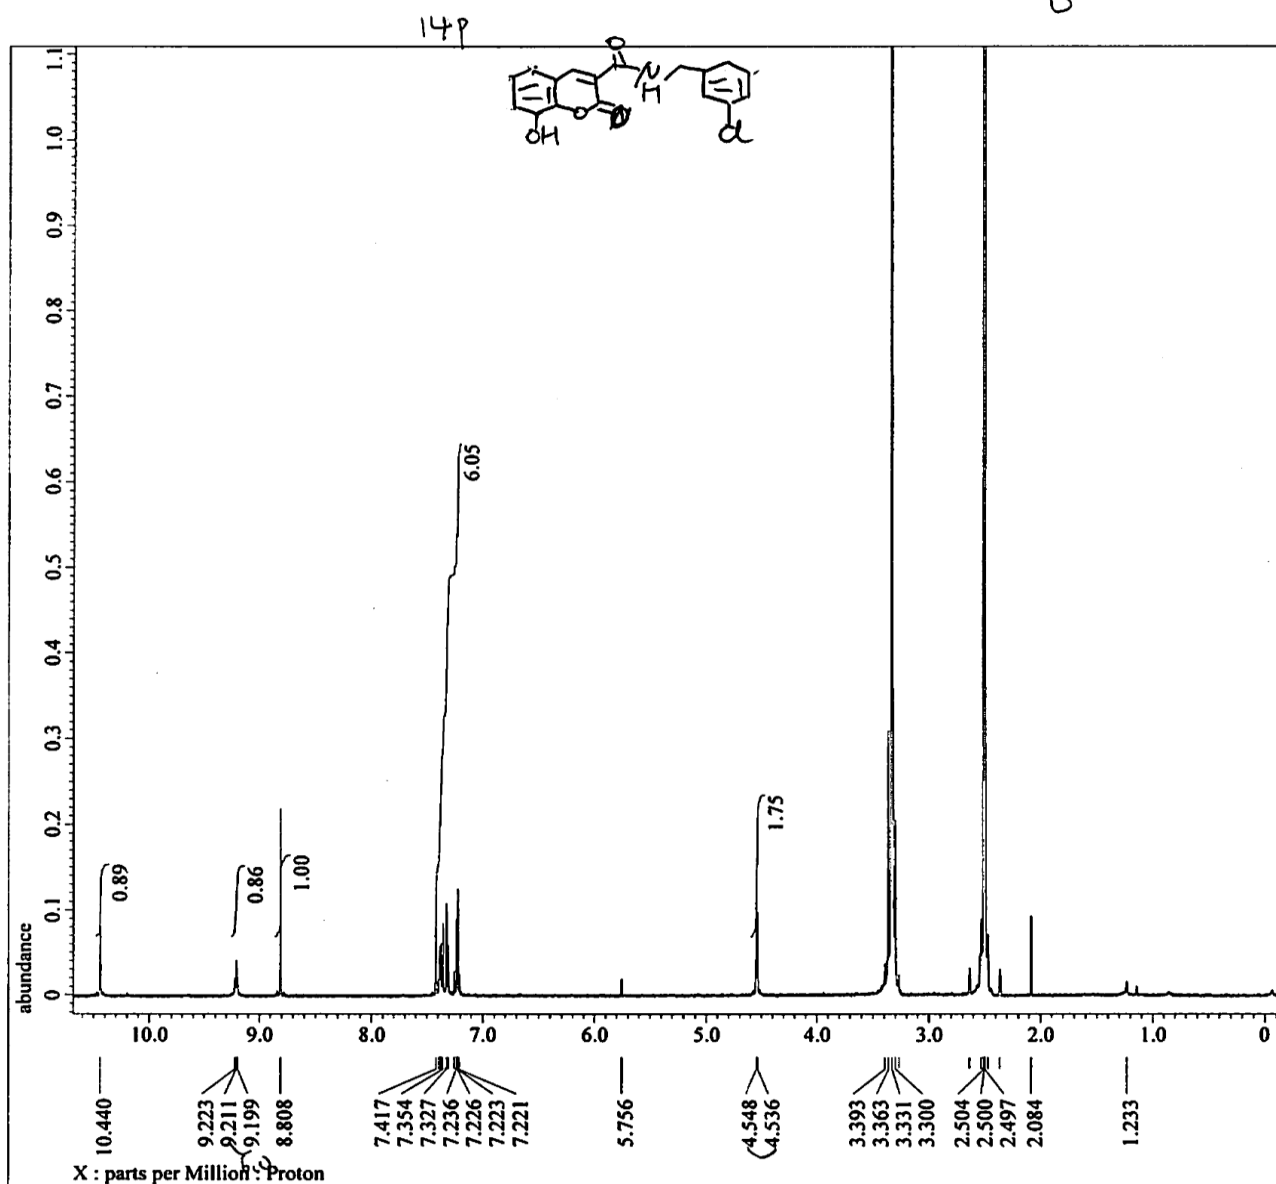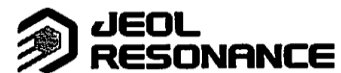

Filename = L1\_hul40403H-1-1-6.jdf  
 Author = delta  
 Experiment = proton.jpg  
 Sample Id = L1  
 Solvent = DMSO-D6  
 Creation Time = 3-APR-2014 15:25:50  
 Revision Time = 3-APR-2014 15:28:02  
 Current Time = 3-APR-2014 15:28:36

Data Format = 1D COMPLEX  
 Dim Size = 26214  
 Dim Title = Proton  
 Dim Units = [ppm]  
 Dimensions = X  
 Site = JNM-ECX500  
 Spectrometer = DELTA2\_NMR

Field Strength = 11.7473579[T] (500[MHz])  
 X\_Acq\_Duration = 3.49175808[s]  
 X\_Domain = 1H  
 X\_Freq = 500.15991521[MHz]  
 X\_Offset = 5.0[ppm]  
 X\_Points = 32768  
 X\_Prescans = 1  
 X\_Resolution = 0.28638868[Hz]  
 X\_Sweep = 9.38438438[kHz]  
 X\_Sweep\_Clipped = 7.50750751[kHz]  
 Irr\_Domain = Proton  
 Irr\_Freq = 500.15991521[MHz]  
 Irr\_Offset = 5.0[ppm]  
 Tri\_Domain = Proton  
 Tri\_Freq = 500.15991521[MHz]  
 Tri\_Offset = 5.0[ppm]  
 Clipped = FALSE  
 Scans = 8  
 Total\_Scans = 8

Relaxation\_Delay = 5[s]  
 Recvr\_Gain = 50  
 Temp\_Get = 21.6[degC]  
 X\_90\_Width = 11.6[us]  
 X\_Acq\_Time = 3.49175808[s]  
 X\_Angle = 45[deg]  
 X\_Atn = 4[deg]  
 X\_Pulse = 5.8[us]  
 Irr\_Mode = OFF  
 Tri\_Mode = OFF  
 Dante\_Presat = FALSE  
 Initial\_Wait = 1[s]  
 Repetition\_Time = 8.49175808[s]

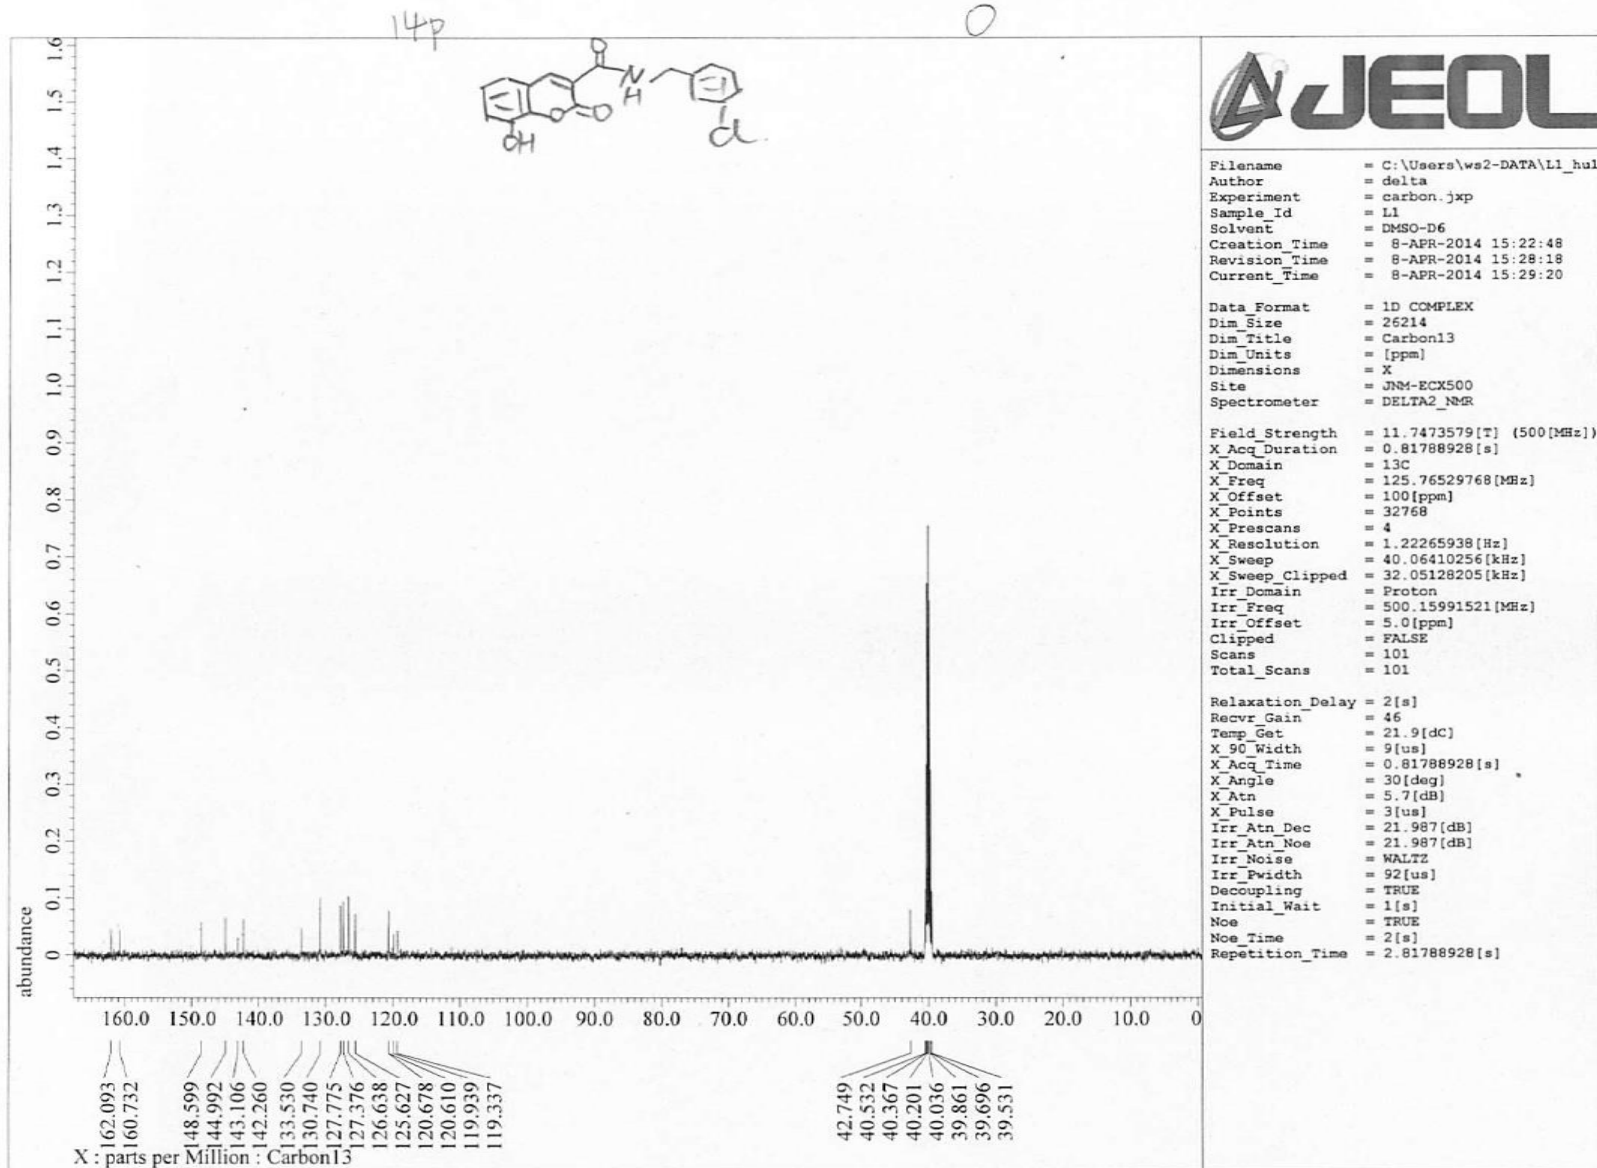



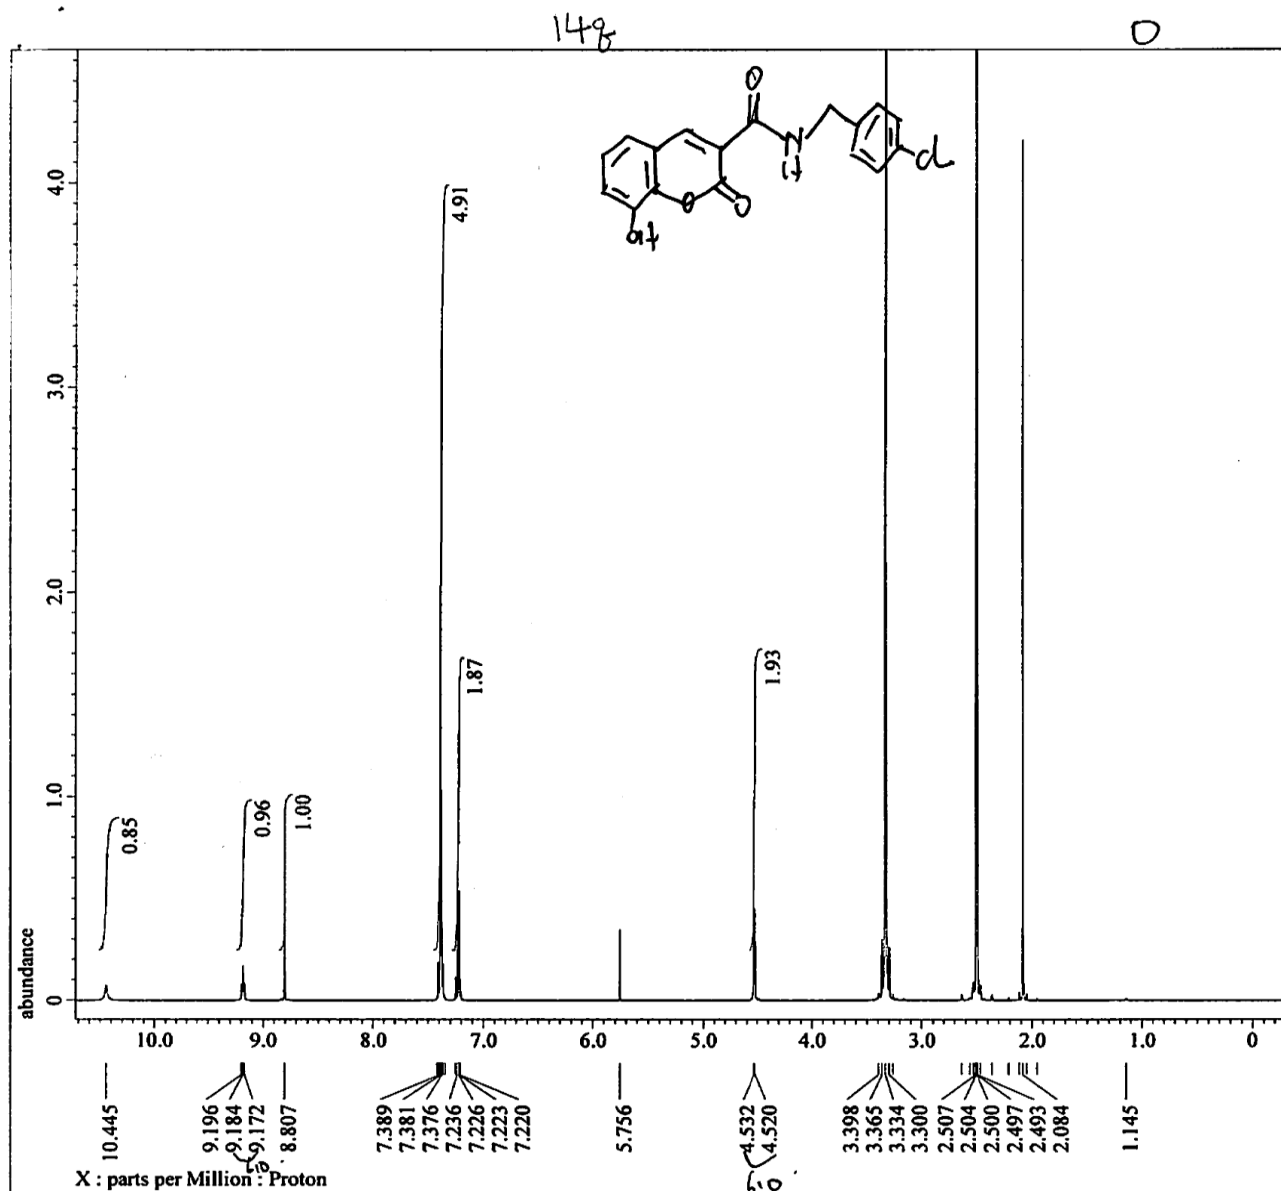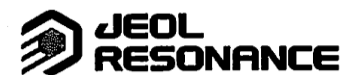

Filename = L1\_hul40407H-1-1-4.jdf  
 Author = delta  
 Experiment = proton.jpg  
 Sample Id = L1  
 Solvent = DMSO-D6  
 Creation Time = 7-APR-2014 13:34:55  
 Revision Time = 7-APR-2014 13:36:19  
 Current Time = 7-APR-2014 13:36:31  
 Data Format = 1D COMPLEX  
 Dim Size = 26214  
 Dim Title = Proton  
 Dim Units = [ppm]  
 Dimensions = X  
 Site = JNM-ECK500  
 Spectrometer = DELTA2 NMR  
 Field Strength = 11.7473579[T] (500[MHz])  
 X Acq Duration = 3.49175808[s]  
 X Domain = 1H  
 X Freq = 500.15991521[MHz]  
 X Offset = 5.0[ppm]  
 X Points = 32768  
 X Proscans = 1  
 X Resolution = 0.28638868[Hz]  
 X Swoop = 9.38438438[kHz]  
 X Swoop Clipped = 7.50750751[kHz]  
 Irr Domain = Proton  
 Irr Freq = 500.15991521[MHz]  
 Irr Offset = 5.0[ppm]  
 Tri Domain = Proton  
 Tri Freq = 500.15991521[MHz]  
 Tri Offset = 5.0[ppm]  
 Clipped = FALSE  
 Scans = 8  
 Total Scans = 8  
 Relaxation Delay = 5[s]  
 Recvr Gain = 48  
 Temp Get = 21.7[dC]  
 X 90 Width = 11.6[us]  
 X Acq Time = 3.49175808[s]  
 X Angle = 45[deg]  
 X Attn = 4[dB]  
 X Pulse = 5.8[us]  
 Irf Mode = Off  
 Tri Mode = Off  
 Datto Presat = FALSE  
 Initial Wait = 1[s]  
 Repetition Time = 8.49175808[s]

148 ~~148~~ ~~138~~

0

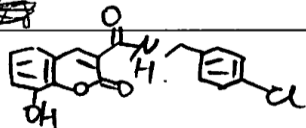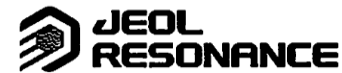

```

Filename      = L1_hu140411C-3-1-2.jdf
Author        = delta
Experiment     = carbon.jsp
Sample_Id      = L1
Solvent        = DMSO-D6
Creation_Time   = 11-APR-2014 16:21:57
Revision_Time  = 11-APR-2014 16:29:48
Current_Time   = 11-APR-2014 16:30:13

Data_Format    = 1D COMPLEX
Dim_Size       = 26214
Dim_Title      = Carbon13
Dim_Units      = [ppm]
Dimensions     = X
Site           = JNM-ECX500
Spectrometer   = DELTA2 NMR

Field_Strength = 11.7473579[T] (500[MHz])
X_Acq_Duration = 0.81788928[s]
X_Domain       = 13C
X_Freq         = 125.76529768[MHz]
X_Offset       = 100[ppm]
X_Points       = 32768
X_Prescans     = 4
X_Resolution   = 1.22265938[Hz]
X_Sweep        = 40.06410256[kHz]
X_Sweep_Clipped = 32.05128205[kHz]
Irr_Domain     = Proton
Irr_Freq       = 500.15991521[MHz]
Irr_Offset     = 5.0[ppm]
Clipped        = FALSE
Scans          = 185
Total_Scans    = 185

Relaxation_Delay = 2[s]
Recvr_Gain       = 46
Temp_Get         = 21.8[dC]
X_90_Width       = 9[us]
X_Acq_Time       = 0.81788928[s]
X_Angle          = 30[deg]
X_Atn            = 5.7[dB]
X_Pulse         = 3[us]
Irr_Atn_Dec      = 21.987[dB]
Irr_Atn_Noo     = 21.987[dB]
Irr_Noise        = WALTZ
Irr_Pwidth       = 92[us]
Decoupling       = TRUE
Initial_Wait     = 1[s]
Noo              = TRUE
Noo_Time         = 2[s]
Repetition_Time  = 2.81788928[s]
  
```

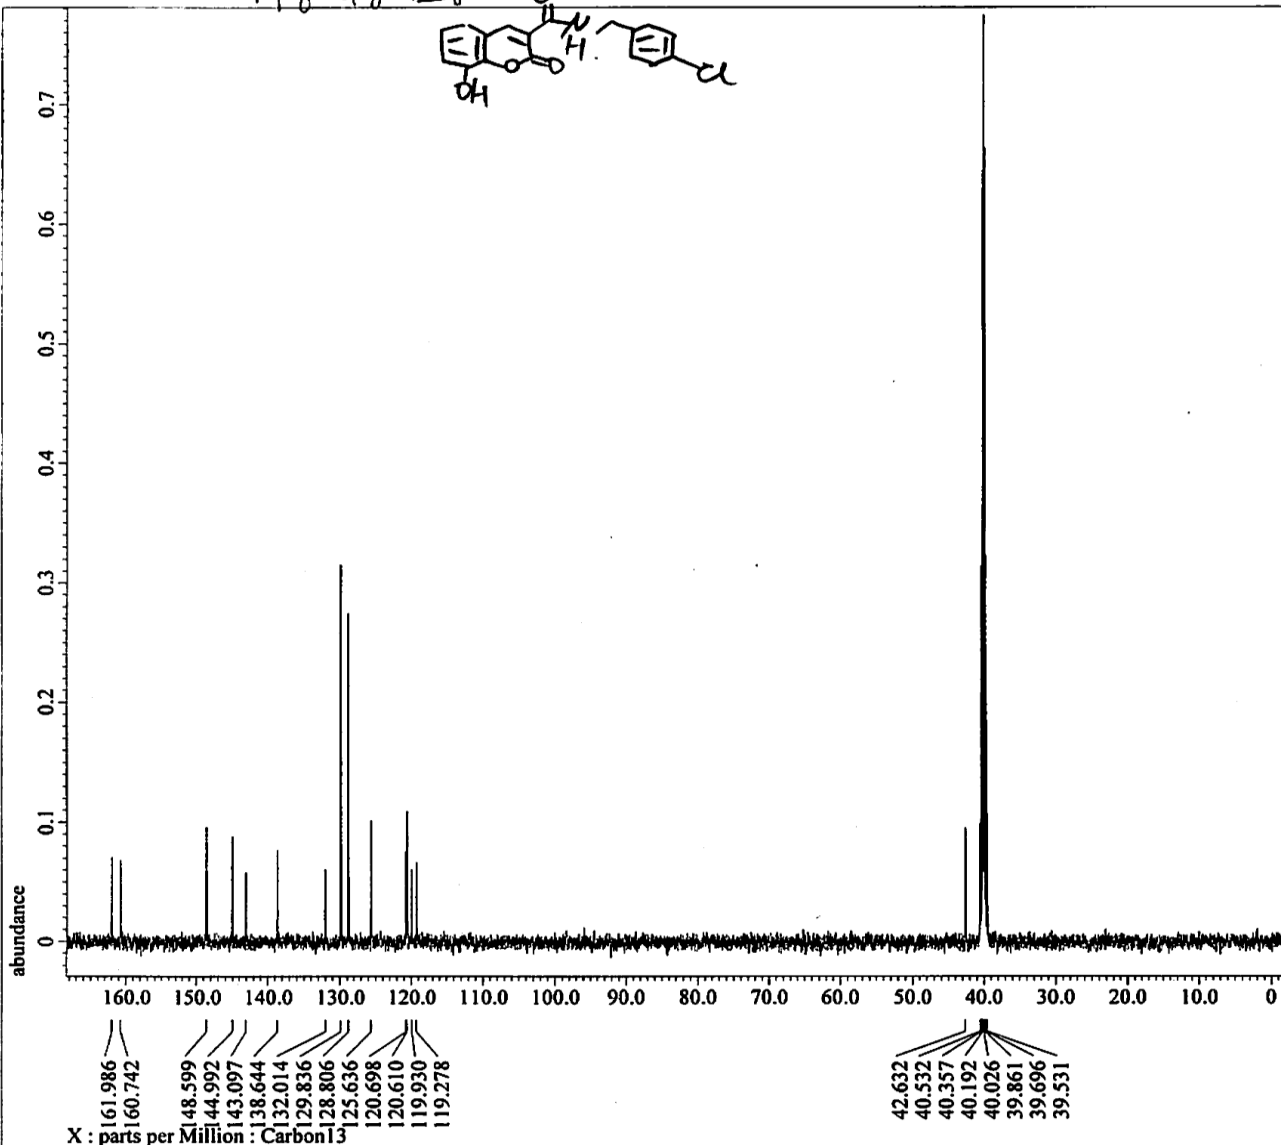

161.986  
160.742  
148.599  
144.992  
143.097  
138.644  
132.014  
129.836  
128.806  
125.636  
120.698  
120.610  
119.930  
119.278

42.632  
40.532  
40.357  
40.192  
40.026  
39.861  
39.696  
39.531
